# Supplementary material for: Type VI Secretion System Toxins Horizontally Shared between Marine Bacteria
Source: PLoS Pathog. 2015 Aug 25;11(8):e1005128. doi: 10.1371/journal.ppat.1005128 (PMC4549250; doi:10.1371/journal.ppat.1005128)
Supplement: S2 Dataset — (XLSX) [file ppat.1005128.s006.xlsx]

## Sheet: Quantitation
CPFP Simple Protein Overview
Submission: SUB3139 - PRJ-204-Vibrio alginolyticus 12G01-Salomon-VaT6SS1 secretome-
Search: MSS3645 - PRJ-204-Vibrio alginolyticus 12G01-Salomon-VaT6SS1 secretome- 12G01 (Meta)
Key to Groups
Group	Data Files	T6SS1
Group Va- 1	OTE1_C03446	-
Group Va- 2	OTE1_C03447	-
Group Va- 3	OTE1_C03448	-
Group Va1+ 1	OTE1_C03443	+
Group Va1+ 2	OTE1_C03444	+
Group Va1+ 3	OTE1_C03445	+
Results
								SPECTRAL COUNTS								SPECTRAL INDEX (MIC SIn)						RATIOS Va1+/Va-					plgem p-value
Protein	Description	Length (AA)	mw (Da)	Indistinguishable Proteins	PSMs	Peptide Seqs	% Coverage	Va- 1	Va- 2	Va- 3	Va1+ 1	Va1+ 2	Va1+ 3	Mean Va-	Mean Va1+	Va- 1	Va- 2	Va- 3	Va1+ 1	Va1+ 2	Va1+ 3	Rep 1	Rep 2	Rep 3	Mean	StdDev
tr|Q1VFR9|Q1VFR9_VIBAL	Lateral flagellin LafA OS=Vibrio alginolyticus 12G01 GN=V12G01_05131 PE=4 SV=1	283	29770.5		16319	28	82	2237	2633	2470	2041	1348	2149	2446.67	1846	0.002128	0.002448	0.002227	0.002115	0.001526	0.002009	0.912383	0.511964	0.87004	0.764796	0.21998	0.00592136
tr|Q1VB39|Q1VB39_VIBAL	BfdA OS=Vibrio alginolyticus 12G01 GN=V12G01_01540 PE=4 SV=1	172	19447.6		2617	21	97.1	156	23	16	758	614	776	65	716	1.415e-05	1.707e-07	1.209e-07	0.0008946	0.0009066	0.0007654	4.85897	26.6957	48.5	26.6849	21.8205	0
tr|Q1V395|Q1V395_VIBAL	Outer membrane protein OmpU OS=Vibrio alginolyticus 12G01 GN=V12G01_21753 PE=4 SV=1	340	37157.4		2126	27	54.7	388.5	394.5	268.5	328.5	172.5	302.5	350.5	267.833	0.0001108	7.888e-05	0.0001348	8.931e-05	4.384e-05	0.0001009	0.84556	0.437262	1.12663	0.803151	0.346635	0.015762
tr|Q1VET5|Q1VET5_VIBAL	Flagellin OS=Vibrio alginolyticus 12G01 GN=V12G01_22748 PE=4 SV=1	377	40158		872	42	95.2	74.5	83.5	73	97.5	39.5	56.5	77	64.5	6.51e-06	5.834e-06	8.071e-06	7.513e-06	4.769e-06	4.658e-06	1.30872	0.473054	0.773973	0.851917	0.423253	0.258533
tr|Q1VFN5|Q1VFN5_VIBAL	ScrA (Aminotransferase) OS=Vibrio alginolyticus 12G01 GN=V12G01_05301 PE=3 SV=1	469	53095.3		692	33	70.6	129	122	114	116	59	81	121.667	85.3333	1.995e-05	1.72e-05	1.867e-05	1.265e-05	7.624e-06	1.223e-05	0.899225	0.483607	0.710526	0.697786	0.208102	0.0169054
tr|Q1V439|Q1V439_VIBAL	Pyruvate dehydrogenase E1 component OS=Vibrio alginolyticus 12G01 GN=V12G01_21523 PE=3 SV=1	887	99798.9		682	66	64.5	131	136	117	99	54	104	128	85.6667	9.559e-06	6.823e-06	6.536e-06	3.465e-06	3.179e-06	5.514e-06	0.755725	0.397059	0.888889	0.680558	0.254385	0.0245228
tr|Q1VFS1|Q1VFS1_VIBAL	Uncharacterized protein OS=Vibrio alginolyticus 12G01 GN=V12G01_05121 PE=4 SV=1	448	48855		681	31	66.7	125	145	112	103	53	80	127.333	78.6667	2.134e-05	2.202e-05	1.414e-05	2.783e-05	7.206e-06	1.3e-05	0.824	0.365517	0.714286	0.634601	0.239403	0.190597
tr|Q1V362|Q1V362_VIBAL	UDP-sugar hydrolase OS=Vibrio alginolyticus 12G01 GN=ushA PE=3 SV=1	562	61526.9		639	37	56	115.5	107.5	78	108	52	72	100.333	77.3333	1.694e-05	1.191e-05	2.372e-05	1.077e-05	7.96e-06	9.244e-06	0.935065	0.483721	0.923077	0.780621	0.257193	0.0112816
tr|Q1VCX2|Q1VCX2_VIBAL	Flagellar hook protein E OS=Vibrio alginolyticus 12G01 GN=flgE PE=4 SV=1	398	41187.9		615	24	77.1	82	107	113	84	30	61	100.667	58.3333	8.284e-06	8.103e-06	1.874e-05	7.007e-06	4.325e-06	7.691e-06	1.02439	0.280374	0.539823	0.614862	0.377642	0.0182274
tr|Q1V8Y4|Q1V8Y4_VIBAL	Flagellin OS=Vibrio alginolyticus 12G01 GN=V12G01_15485 PE=4 SV=1	384	40978.2		603	27	89.3	80	91	79	118.5	43	87	83.3333	82.8333	6.581e-06	6.841e-06	6.622e-06	1.109e-05	5.135e-06	8.113e-06	1.48125	0.472527	1.10127	1.01835	0.509448	0.237637
tr|Q1VET4|Q1VET4_VIBAL	Flagellin OS=Vibrio alginolyticus 12G01 GN=V12G01_22753 PE=4 SV=1	376	39953.7		548	34	91	82	87	84	123	48	72	84.3333	81	1.055e-05	1.261e-05	1.24e-05	1.323e-05	1.325e-05	6.604e-06	1.5	0.551724	0.857143	0.969622	0.484041	0.48006
tr|Q1VAG8|Q1VAG8_VIBAL	Chaperone protein DnaK OS=Vibrio alginolyticus 12G01 GN=dnaK PE=1 SV=1	637	69145.3		530	56	69.7	104.5	102.5	89	57	54	74	98.6667	61.6667	7.532e-06	6.756e-06	4.781e-06	2.431e-06	5.399e-06	4.586e-06	0.545455	0.526829	0.831461	0.634581	0.170757	0.0755494
tr|Q1V3W9|Q1V3W9_VIBAL	DNA-directed RNA polymerase subunit beta' OS=Vibrio alginolyticus 12G01 GN=rpoC PE=3 SV=1	1400	155094		524	80	55.9	97	99	100	76	52	66	98.6667	64.6667	3.41e-06	2.224e-06	2.732e-06	2.006e-06	2.397e-06	2.275e-06	0.783505	0.525253	0.66	0.656253	0.129167	0.281386
tr|Q1VD14|Q1VD14_VIBAL	Putative outer membrane protein OmpV OS=Vibrio alginolyticus 12G01 GN=V12G01_02700 PE=4 SV=1	289	31950.6		516	16	48.8	77	91	72	66	28	68	80	54	1.283e-05	1.142e-05	8.666e-06	7.005e-06	4.805e-06	8.151e-06	0.857143	0.307692	0.944444	0.703093	0.345198	0.0358937
tr|Q1V7E1|Q1V7E1_VIBAL	Outer membrane protein OmpW OS=Vibrio alginolyticus 12G01 GN=V12G01_03756 PE=4 SV=1	214	23338.6		514	6	39.3	102	85	75	99	44	70	87.3333	71	1.446e-05	8.449e-06	9.444e-06	7.089e-06	5.198e-06	6.475e-06	0.970588	0.517647	0.933333	0.80719	0.251442	0.0273666
tr|Q1VCX8|Q1VCX8_VIBAL	Putative flagellar hook-associated protein OS=Vibrio alginolyticus 12G01 GN=V12G01_02880 PE=4 SV=1	457	48851.3		508	26	61.3	93	98	81	72	29	66	90.6667	55.6667	8.04e-06	1.002e-05	1.039e-05	5.778e-06	3.127e-06	6.897e-06	0.774194	0.295918	0.814815	0.628309	0.288574	0.0250797
tr|Q1VFX1|Q1VFX1_VIBAL	GlcNAc-binding protein A OS=Vibrio alginolyticus 12G01 GN=gbpA PE=3 SV=1	487	53595		495	29	64.9	88	93	74	80	40	76	85	65.3333	1.115e-05	7.344e-06	8.078e-06	8.427e-06	5.038e-06	7.381e-06	0.909091	0.430108	1.02703	0.788742	0.316135	0.169526
tr|Q1VCV6|Q1VCV6_VIBAL	Putative outer membrane protein OmpA OS=Vibrio alginolyticus 12G01 GN=V12G01_02990 PE=3 SV=1	326	35813.3		492	8	36.5	59	51	20	21	131	117	43.3333	89.6667	1.565e-06	1.012e-06	6.718e-07	3.243e-06	0.0004644	5.632e-05	0.355932	2.56863	5.85	2.92485	2.7643	6.80128e-05
tr|Q1V681|Q1V681_VIBAL	Extracellular nuclease-related protein OS=Vibrio alginolyticus 12G01 GN=V12G01_15020 PE=4 SV=1	984	106774		481	52	62.6	86	79	65	79	38	56	76.6667	57.6667	4.391e-06	2.611e-06	2.721e-06	3.858e-06	2.599e-06	2.085e-06	0.918605	0.481013	0.861538	0.753719	0.237888	0.429279
tr|Q1V9W3|Q1V9W3_VIBAL	Uncharacterized protein OS=Vibrio alginolyticus 12G01 GN=V12G01_21338 PE=4 SV=1	1013	111628		469	63	64.7	90	86	69	87	30	68	81.6667	61.6667	5.036e-06	3.395e-06	2.609e-06	3.189e-06	1.273e-06	3.107e-06	0.966667	0.348837	0.985507	0.767004	0.362265	0.130878
tr|Q1VDP2|Q1VDP2_VIBAL	Uncharacterized protein OS=Vibrio alginolyticus 12G01 GN=V12G01_19327 PE=4 SV=1	531	58270.8		468	31	67	81	94	71	80	45	65	82	63.3333	9.122e-06	1.119e-05	9.808e-06	7.672e-06	6.232e-06	7.14e-06	0.987654	0.478723	0.915493	0.793957	0.275374	0.0824655
tr|Q1V3X0|Q1V3X0_VIBAL	DNA-directed RNA polymerase beta subunit (Fragment) OS=Vibrio alginolyticus 12G01 GN=V12G01_00020 PE=3 SV=1	1118	124080		467	65	66.7	76	87	86	73	41	68	83	60.6667	2.015e-06	1.731e-06	2.399e-06	1.545e-06	1.08e-06	1.999e-06	0.960526	0.471264	0.790698	0.740829	0.248414	0.239486
tr|Q1VCX9|Q1VCX9_VIBAL	Flagellar hook-associated protein L OS=Vibrio alginolyticus 12G01 GN=flgL PE=4 SV=1	299	32433.1		454	26	88	77	97	80	65	39	58	84.6667	54	1.26e-05	1.315e-05	1.351e-05	9.631e-06	6.856e-06	8.574e-06	0.844156	0.402062	0.725	0.657073	0.228741	0.0408289
tr|Q1V5E2|Q1V5E2_VIBAL	Putative NAD-glutamate dehydrogenase OS=Vibrio alginolyticus 12G01 GN=V12G01_18077 PE=4 SV=1	1613	184070		432	89	54.1	82	77	77	59	30	60	78.6667	49.6667	1.68e-06	1.372e-06	1.679e-06	6.599e-07	6.701e-07	8.828e-07	0.719512	0.38961	0.779221	0.629448	0.20984	0.0561573
tr|Q1V6F0|Q1V6F0_VIBAL	Elongation factor Tu OS=Vibrio alginolyticus 12G01 GN=tuf PE=3 SV=1	394	43189.8		422	25	67	91	69	59	52	54	56	73	54	1.528e-05	7.032e-06	7.614e-06	6.439e-06	2e-05	1.114e-05	0.571429	0.782609	0.949153	0.76773	0.189301	0.164264
tr|Q1V4P7|Q1V4P7_VIBAL	60 kDa chaperonin OS=Vibrio alginolyticus 12G01 GN=groL PE=3 SV=1	548	57740.7		385	35	53.6	60	64	66	57	46	58	63.3333	53.6667	3.87e-06	3.985e-06	4.542e-06	2.277e-06	4.112e-06	3.831e-06	0.95	0.71875	0.878788	0.849179	0.118434	0.290053
tr|Q1V3I9|Q1V3I9_VIBAL	Immunogenic protein OS=Vibrio alginolyticus 12G01 GN=V12G01_12033 PE=4 SV=1	322	34745.3		382	29	83.2	60.5	64.5	64	63.5	33.5	44.5	63	47.1667	1.299e-05	9.677e-06	1.257e-05	9.967e-06	7.795e-06	9.053e-06	1.04959	0.51938	0.695312	0.75476	0.270056	0.127698
tr|Q1VB33|Q1VB33_VIBAL	Uncharacterized protein OS=Vibrio alginolyticus 12G01 GN=V12G01_01570 PE=4 SV=1	3513	379834		369	95	33.7	62	90	42	60	17	67	64.6667	48	4.263e-07	5.267e-07	2.598e-07	3.63e-07	1.065e-07	4.353e-07	0.967742	0.188889	1.59524	0.91729	0.704531	0.365475
tr|Q1VB40|Q1VB40_VIBAL	Putative VgrG protein OS=Vibrio alginolyticus 12G01 GN=V12G01_01535 PE=4 SV=1	692	77530		358	38	64.3	29	30	34	117	44	80	31	80.3333	1.054e-06	8.053e-07	1.059e-06	4.943e-06	3.277e-06	4.681e-06	4.03448	1.46667	2.35294	2.61803	1.30427	0.00319235
tr|Q1VAZ1|Q1VAZ1_VIBAL	Peptide ABC transporter, periplasmic peptide-binding protein OS=Vibrio alginolyticus 12G01 GN=V12G01_10698 PE=4 SV=1	517	57566.9		350	32	73.1	47	67	56	56	31	49	56.6667	45.3333	5.205e-06	5.496e-06	4.545e-06	2.839e-06	4.861e-06	3.74e-06	1.19149	0.462687	0.875	0.843059	0.36545	0.168714
tr|Q1V437|Q1V437_VIBAL	Dihydrolipoyl dehydrogenase OS=Vibrio alginolyticus 12G01 GN=V12G01_21533 PE=3 SV=1	475	51090.7		344	37	67.4	60	61	61	45	42	52	60.6667	46.3333	7.379e-06	5.674e-06	9.549e-06	3.883e-06	6.589e-06	5.538e-06	0.75	0.688525	0.852459	0.763661	0.0828166	0.106984
tr|Q1V5S3|Q1V5S3_VIBAL	Trigger factor OS=Vibrio alginolyticus 12G01 GN=tig PE=3 SV=1	435	48503.9		343	35	70.1	70	65	58	49	34	48	64.3333	43.6667	7.172e-06	3.755e-06	4.693e-06	3.475e-06	5.174e-06	4.496e-06	0.7	0.523077	0.827586	0.683554	0.152919	0.304599
tr|Q1VG08|Q1VG08_VIBAL	Ornithine decarboxylase, inducible OS=Vibrio alginolyticus 12G01 GN=V12G01_04686 PE=4 SV=1	726	82458		333	34	54.7	64	61	54	34	23	48	59.6667	35	4.862e-06	2.161e-06	2.633e-06	1.345e-06	1.683e-06	2.738e-06	0.53125	0.377049	0.888889	0.599063	0.262572	0.0799702
tr|Q1V718|Q1V718_VIBAL	Uncharacterized protein OS=Vibrio alginolyticus 12G01 GN=V12G01_16082 PE=4 SV=1	305	34499.1		329	17	50.8	53	58	49	45	21	30	53.3333	32	9.33e-06	7.289e-06	7.217e-06	5.046e-06	5.839e-06	6.117e-06	0.849057	0.362069	0.612245	0.60779	0.243524	0.108026
tr|Q1VG13|Q1VG13_VIBAL	Putative maltogenic amylase OS=Vibrio alginolyticus 12G01 GN=V12G01_04661 PE=4 SV=1	543	59539.1		329	27	59.7	68	56	46	60	25	41	56.6667	42	8.203e-06	4.011e-06	4.304e-06	3.263e-06	3.159e-06	3.465e-06	0.882353	0.446429	0.891304	0.740029	0.254304	0.0567439
tr|Q1V348|Q1V348_VIBAL	Isocitrate dehydrogenase OS=Vibrio alginolyticus 12G01 GN=V12G01_20748 PE=4 SV=1	741	80937.3		304	51	62.6	51	60	60	47	18	45	57	36.6667	1.97e-06	1.603e-06	2.982e-06	1.639e-06	7.59e-07	1.865e-06	0.921569	0.3	0.75	0.65719	0.32101	0.138402
tr|Q1V8Z2|Q1V8Z2_VIBAL	Flagellar hook protein E OS=Vibrio alginolyticus 12G01 GN=flgE PE=4 SV=1	437	47480.9		304	23	67.7	45	49	49	57	21	36	47.6667	38	4.396e-06	3.862e-06	4.494e-06	3.858e-06	2.216e-06	3.252e-06	1.26667	0.428571	0.734694	0.809977	0.424089	0.162257
tr|Q1V5D5|Q1V5D5_VIBAL	Uncharacterized protein OS=Vibrio alginolyticus 12G01 GN=V12G01_18112 PE=4 SV=1	577	62227.9		295	28	43.3	42	51	45	50	27	37	46	38	3.975e-06	2.559e-06	3.165e-06	2.545e-06	2.3e-06	1.845e-06	1.19048	0.529412	0.822222	0.84737	0.331249	0.143698
tr|Q1VA98|Q1VA98_VIBAL	Antioxidant, AhpC/Tsa family protein OS=Vibrio alginolyticus 12G01 GN=V12G01_13090 PE=4 SV=1	203	22277.2		293	15	70.4	52	46	52	45	36	41	50	40.6667	2.05e-05	1.419e-05	2.393e-05	9.972e-06	1.376e-05	1.483e-05	0.865385	0.782609	0.788462	0.812152	0.0461939	0.036119
tr|Q1VEZ5|Q1VEZ5_VIBAL	Elongation factor Ts OS=Vibrio alginolyticus 12G01 GN=tsf PE=3 SV=1	281	29904.5		284	27	81.1	66	47	43	38	22	44	52	34.6667	1.152e-05	4.683e-06	6.89e-06	2.794e-06	2.814e-06	4.835e-06	0.575758	0.468085	1.02326	0.689033	0.29441	0.012187
tr|Q1VAZ6|Q1VAZ6_VIBAL	Outer membrane protein OmpA OS=Vibrio alginolyticus 12G01 GN=V12G01_01755 PE=3 SV=1	330	36158.2		270	13	44.5	44	43	31	45	32	43	39.3333	40	1.078e-05	1.194e-05	5.429e-06	1.068e-05	4.705e-06	6.372e-06	1.02273	0.744186	1.3871	1.05134	0.322409	0.156812
tr|Q1V354|Q1V354_VIBAL	Fructose-bisphosphate aldolase OS=Vibrio alginolyticus 12G01 GN=V12G01_13939 PE=4 SV=1	358	38813.4		265	18	65.4	43	40	42	38	26	38	41.6667	34	6.28e-06	5.072e-06	6.015e-06	4.858e-06	6.343e-06	4.947e-06	0.883721	0.65	0.904762	0.812828	0.141405	0.522721
tr|Q1V527|Q1V527_VIBAL	Polyribonucleotide nucleotidyltransferase OS=Vibrio alginolyticus 12G01 GN=pnp PE=3 SV=1	711	77042.8		265	36	57.9	51	53	53	34	18	38	52.3333	30	2.322e-06	1.829e-06	2.023e-06	1.06e-06	8.046e-07	1.477e-06	0.666667	0.339623	0.716981	0.574423	0.204894	0.073237
tr|Q1VFX5|Q1VFX5_VIBAL	Uncharacterized protein OS=Vibrio alginolyticus 12G01 GN=V12G01_04851 PE=4 SV=1	297	30750.2		263	13	69	45	47	39	46	24	40	43.6667	36.6667	1.161e-05	1.102e-05	7.401e-06	8.1e-06	1.24e-05	1.106e-05	1.02222	0.510638	1.02564	0.852834	0.296355	0.567371
tr|Q1V607|Q1V607_VIBAL	Alanine dehydrogenase OS=Vibrio alginolyticus 12G01 GN=V12G01_20346 PE=3 SV=1	374	40007.8		260	21	50.5	47	50	48	33	23	37	48.3333	31	9.919e-06	6.7e-06	8.364e-06	5.862e-06	4.966e-06	6.647e-06	0.702128	0.46	0.770833	0.64432	0.163281	0.0934708
tr|Q1VA66|Q1VA66_VIBAL	54K polar flagellar sheath protein A OS=Vibrio alginolyticus 12G01 GN=V12G01_20823 PE=4 SV=1	491	53662.9		256	25	50.7	51	50	34	47	19	30	45	32	4.65e-06	3.819e-06	4.987e-06	2.786e-06	3.187e-06	2.555e-06	0.921569	0.38	0.882353	0.727974	0.301991	0.0835282
tr|Q1V3D3|Q1V3D3_VIBAL	Aconitate hydratase 2 OS=Vibrio alginolyticus 12G01 GN=V12G01_21623 PE=3 SV=1	865	94512.9		256	38	51.1	45	43	47	31	18	36	45	28.3333	1.7e-06	1.365e-06	2.069e-06	9.874e-07	7.17e-07	1.282e-06	0.688889	0.418605	0.765957	0.624484	0.182413	0.105373
tr|Q1VF93|Q1VF93_VIBAL	Elongation factor EF-2 (Fragment) OS=Vibrio alginolyticus 12G01 GN=V12G01_21958 PE=1 SV=1	442	48060.1		252	26	57.2	58	46	37	29	26	36	47	30.3333	9.212e-06	3.029e-06	4.012e-06	2.684e-06	3.188e-06	4.128e-06	0.5	0.565217	0.972973	0.679397	0.256327	0.0657853
tr|Q1VCV1|Q1VCV1_VIBAL	Uncharacterized protein OS=Vibrio alginolyticus 12G01 GN=V12G01_03015 PE=4 SV=1	183	19810.5		248	8	72.1	44	58	54	42	14	21	52	25.6667	1.049e-05	6.292e-06	9.263e-06	6.436e-06	3.847e-06	5.781e-06	0.954545	0.241379	0.388889	0.528271	0.37646	0.0461467
tr|Q1VB00|Q1VB00_VIBAL	Transketolase OS=Vibrio alginolyticus 12G01 GN=V12G01_01735 PE=3 SV=1	663	72030.5		246	33	64	31	31	25	23.5	11	22	29	18.8333	2.02e-06	1.504e-06	1.343e-06	9.057e-07	1.092e-06	1.316e-06	0.758065	0.354839	0.88	0.664301	0.27485	0.18
tr|Q1VAR0|Q1VAR0_VIBAL	Phosphoenolpyruvate carboxykinase [ATP] OS=Vibrio alginolyticus 12G01 GN=pckA PE=3 SV=1	542	60252.1		243	39	70.8	44	45	41	35	19	31	43.3333	28.3333	3.562e-06	2.937e-06	2.706e-06	1.2e-06	1.557e-06	1.731e-06	0.795455	0.422222	0.756098	0.657925	0.205071	0.0389883
tr|Q1VDY2|Q1VDY2_VIBAL	Arylsulfatase A OS=Vibrio alginolyticus 12G01 GN=V12G01_18877 PE=4 SV=1	505	56567.1		241	30	57.8	46	37	42	47	22	35	41.6667	34.6667	3.726e-06	2.832e-06	2.792e-06	3.101e-06	1.798e-06	2.898e-06	1.02174	0.594595	0.833333	0.816556	0.214066	0.333747
tr|Q1VFN2|Q1VFN2_VIBAL	2-amino-3-ketobutyrate coenzyme A ligase OS=Vibrio alginolyticus 12G01 GN=V12G01_05316 PE=3 SV=1	397	43285.8		237	22	70.3	39	39	53	29	19	40	43.6667	29.3333	4.203e-06	2.809e-06	4.428e-06	1.815e-06	2.196e-06	4.498e-06	0.74359	0.487179	0.754717	0.661829	0.151353	0.181947
tr|Q1VB36|Q1VB36_VIBAL	Uncharacterized protein OS=Vibrio alginolyticus 12G01 GN=V12G01_01555 PE=4 SV=1	1581	177732		232	76	55.3	0	0	1	100	39	74	0.333333	71	0	0	8.105e-09	1.857e-06	1.054e-06	1.635e-06			74	74		0.00173858
tr|Q1VD60|Q1VD60_VIBAL	Phosphoenolpyruvate synthase OS=Vibrio alginolyticus 12G01 GN=V12G01_02470 PE=3 SV=1	790	87571.9		230	34	48	41	42	46	28	16	35	43	26.3333	2.661e-06	1.394e-06	1.839e-06	9.562e-07	1.11e-06	1.435e-06	0.682927	0.380952	0.76087	0.60825	0.200666	0.106193
tr|Q1V5L9|Q1V5L9_VIBAL	Enolase OS=Vibrio alginolyticus 12G01 GN=eno PE=3 SV=1	433	45716.3		229	21	47.1	47	43	38	22	23	33	42.6667	26	8.15e-06	3.422e-06	5.598e-06	1.962e-06	5.698e-06	2.878e-06	0.468085	0.534884	0.868421	0.623797	0.214468	0.0622359
tr|Q1VCX4|Q1VCX4_VIBAL	Putative flagellar basal-body rod protein OS=Vibrio alginolyticus 12G01 GN=V12G01_02900 PE=4 SV=1	261	28035.8		224	10	49	36	44	39	38	23	31	39.6667	30.6667	4.8e-06	5.375e-06	6.533e-06	3.976e-06	4.622e-06	4.223e-06	1.05556	0.522727	0.794872	0.791052	0.266435	0.180935
tr|Q1VC58|Q1VC58_VIBAL	Uncharacterized protein OS=Vibrio alginolyticus 12G01 GN=V12G01_17542 PE=4 SV=1	492	53255.5		220	22	36.8	1	1	3	8	112	53	1.66667	57.6667	5.467e-08	2.36e-09	4.9e-08	2.956e-07	6.286e-05	1.413e-05	8	112	17.6667	45.8889	57.4576	0.000357067
tr|Q1VE85|Q1VE85_VIBAL	Uncharacterized protein OS=Vibrio alginolyticus 12G01 GN=V12G01_18362 PE=4 SV=1	272	29967.2		218	29	77.6	34	33	39	43	20	30	35.3333	31	5.601e-06	5.442e-06	6.84e-06	5.325e-06	3.601e-06	4.304e-06	1.26471	0.606061	0.769231	0.879999	0.34301	0.150444
tr|Q1V8Z3|Q1V8Z3_VIBAL	Flagellar basal-body rod modification protein D OS=Vibrio alginolyticus 12G01 GN=flgD PE=4 SV=1	236	25121.7		218	21	97.9	34	40	28	40	20	29	34	29.6667	6.317e-06	4.849e-06	4.884e-06	4.723e-06	4.552e-06	4.517e-06	1.17647	0.5	1.03571	0.904062	0.356935	0.341564
tr|Q1VFC2|Q1VFC2_VIBAL	Maltose ABC transporter periplasmic protein OS=Vibrio alginolyticus 12G01 GN=malE PE=4 SV=1	392	42240.3		211	21	58.9	33	36	30	36	14	37	33	29	4.617e-06	4.004e-06	3.495e-06	3.726e-06	3.722e-06	4.407e-06	1.09091	0.388889	1.23333	0.904377	0.45207	0.661798
tr|Q1V3Z6|Q1V3Z6_VIBAL	Transketolase OS=Vibrio alginolyticus 12G01 GN=V12G01_13964 PE=3 SV=1	664	72309.5		203	31	63.3	24	22	19	13.5	8	16	21.6667	12.5	1.415e-06	8.741e-07	9.843e-07	5.058e-07	6.687e-07	9.669e-07	0.5625	0.363636	0.842105	0.589414	0.240367	0.182325
tr|Q1VFE7|Q1VFE7_VIBAL	Azurin OS=Vibrio alginolyticus 12G01 GN=V12G01_05741 PE=4 SV=1	150	16024.7		195	6	67.3	33	43	35	35	10	25	37	23.3333	3.923e-06	4.168e-06	5.507e-06	4.217e-06	2.386e-06	2.298e-06	1.06061	0.232558	0.714286	0.66915	0.415865	0.0953751
tr|Q1V7J7|Q1V7J7_VIBAL	Uncharacterized protein OS=Vibrio alginolyticus 12G01 GN=V12G01_11653 PE=4 SV=1	700	78592.1		192	24	32.4	35	44	34	33	14	27	37.6667	24.6667	2.679e-06	2.839e-06	2.583e-06	1.192e-06	1.282e-06	1.571e-06	0.942857	0.318182	0.794118	0.685052	0.326307	0.0456111
tr|Q1V4N0|Q1V4N0_VIBAL	Dihydrolipoyllysine-residue succinyltransferase component of 2-oxoglutarate dehydrogenase complex OS=Vibrio alginolyticus 12G01 GN=V12G01_15797 PE=3 SV=1	402	43818.9		190	21	57.5	33	28	35	30	20	31	32	27	2.472e-06	1.866e-06	3.904e-06	1.507e-06	1.327e-06	2.104e-06	0.909091	0.714286	0.885714	0.836364	0.106367	0.0888162
tr|Q1V9S9|Q1V9S9_VIBAL	Glycine dehydrogenase (decarboxylating) OS=Vibrio alginolyticus 12G01 GN=gcvP PE=1 SV=1	954	104393		187	35	42.5	31	33	33	21	15	29	32.3333	21.6667	1.378e-06	8.004e-07	1.219e-06	6.682e-07	5.469e-07	7.98e-07	0.677419	0.454545	0.878788	0.670251	0.212212	0.13753
tr|Q1V8Y6|Q1V8Y6_VIBAL	Flagellar hook-associated protein K OS=Vibrio alginolyticus 12G01 GN=flgK PE=4 SV=1	646	71398.7		182	37	62.5	30	36	33	37	10	25	33	24	1.258e-06	8.766e-07	9.978e-07	1.132e-06	6.677e-07	8.366e-07	1.23333	0.277778	0.757576	0.756229	0.477779	0.434457
tr|Q1VAR8|Q1VAR8_VIBAL	Glutamine synthetase OS=Vibrio alginolyticus 12G01 GN=glnA PE=3 SV=1	469	51704.3		182	19	40.5	33	31	32	29	18	27	32	24.6667	2.697e-06	1.385e-06	2.447e-06	1.247e-06	1.309e-06	2.443e-06	0.878788	0.580645	0.84375	0.767728	0.162963	0.248153
tr|Q1V8A8|Q1V8A8_VIBAL	ATP synthase subunit alpha OS=Vibrio alginolyticus 12G01 GN=atpA PE=3 SV=1	513	55687		178	33	55	35	31	36	25	21	28	34	24.6667	2.082e-06	1.411e-06	2.023e-06	9.788e-07	1.7e-06	1.733e-06	0.714286	0.677419	0.777778	0.723161	0.0507645	0.317433
tr|Q1V2Z8|Q1V2Z8_VIBAL	30S ribosomal protein S1 OS=Vibrio alginolyticus 12G01 GN=V12G01_15927 PE=4 SV=1	389	43171.4		170	22	44.5	36	26	22	18	23	18	28	19.6667	6.582e-06	2.238e-06	1.936e-06	9.897e-07	6.855e-06	2.575e-06	0.5	0.884615	0.818182	0.734266	0.205581	0.643209
tr|Q1V4K0|Q1V4K0_VIBAL	Aspartate ammonia-lyase OS=Vibrio alginolyticus 12G01 GN=V12G01_00945 PE=4 SV=1	483	52742.7		169	19	41.8	30	29	27	27	19	27	28.6667	24.3333	3.296e-06	2.499e-06	2.386e-06	1.571e-06	1.466e-06	2.348e-06	0.9	0.655172	1	0.851724	0.17741	0.128689
tr|Q1V4M9|Q1V4M9_VIBAL	Succinyl-CoA ligase [ADP-forming] subunit beta OS=Vibrio alginolyticus 12G01 GN=sucC PE=3 SV=1	388	41610.4		165	19	51	28	33	32	20	18	24	31	20.6667	3.241e-06	3.109e-06	4.394e-06	1.835e-06	3.028e-06	2.58e-06	0.714286	0.545455	0.75	0.669913	0.109254	0.14017
tr|Q1VEN7|Q1VEN7_VIBAL	Long-chain fatty acid transport protein OS=Vibrio alginolyticus 12G01 GN=V12G01_22988 PE=4 SV=1	419	46131.5		164	18	54.4	33	31	31	29	11	19	31.6667	19.6667	4.105e-06	2.514e-06	3.226e-06	3.452e-06	8.629e-07	1.475e-06	0.878788	0.354839	0.612903	0.61551	0.261984	0.0731392
tr|Q1VEZ6|Q1VEZ6_VIBAL	30S ribosomal protein S2 OS=Vibrio alginolyticus 12G01 GN=rpsB PE=3 SV=1	242	26752.9		160	21	70.7	21	22	23	17	33	21	22	23.6667	2.972e-06	2.738e-06	2.954e-06	9.291e-07	9.383e-06	3.387e-06	0.809524	1.5	0.913043	1.07419	0.372378	0.0764123
tr|Q1VAR7|Q1VAR7_VIBAL	BipA protein OS=Vibrio alginolyticus 12G01 GN=V12G01_11068 PE=4 SV=1	609	67205.4		158	25	40.6	32	27	26	20	15	22	28.3333	19	2.265e-06	1.01e-06	1.821e-06	7.812e-07	1.497e-06	1.451e-06	0.625	0.555556	0.846154	0.67557	0.151756	0.226976
tr|Q1V9V1|Q1V9V1_VIBAL	Iron-containing alcohol dehydrogenase OS=Vibrio alginolyticus 12G01 GN=V12G01_08790 PE=4 SV=1	382	42048.4		155	18	55.2	28	27	27	25	7	26	27.3333	19.3333	3.786e-06	1.685e-06	1.733e-06	1.499e-06	1.352e-06	2.361e-06	0.892857	0.259259	0.962963	0.705026	0.387634	0.190954
tr|Q1V8C6|Q1V8C6_VIBAL	Putative lipase OS=Vibrio alginolyticus 12G01 GN=V12G01_08645 PE=4 SV=1	802	84458.6		154	18	28.8	28	28	30	27	15	24	28.6667	22	1.88e-06	1.215e-06	1.498e-06	1.416e-06	1.301e-06	8.803e-07	0.964286	0.535714	0.8	0.766667	0.216221	0.304119
tr|Q1V4T2|Q1V4T2_VIBAL	Outer membrane channel protein OS=Vibrio alginolyticus 12G01 GN=tolC PE=4 SV=1	442	47972.4		154	21	54.8	26	31	28	25	13	25	28.3333	21	2.692e-06	2.384e-06	2.215e-06	1.231e-06	1.037e-06	1.888e-06	0.961538	0.419355	0.892857	0.757917	0.295207	0.079762
tr|Q1VA68|Q1VA68_VIBAL	Amino acid ABC transporter, periplasmic amino acid-binding protein OS=Vibrio alginolyticus 12G01 GN=V12G01_20813 PE=3 SV=1	256	28293.4		154	19	60.2	29	28	29	30	16	17	28.6667	21	4.235e-06	2.201e-06	3.747e-06	2.876e-06	3.057e-06	2.428e-06	1.03448	0.571429	0.586207	0.730706	0.263182	0.301428
tr|Q1VEF7|Q1VEF7_VIBAL	Glyceraldehyde-3-phosphate dehydrogenase OS=Vibrio alginolyticus 12G01 GN=V12G01_23388 PE=3 SV=1	331	35365		153	18	51.1	25	24	18	21	31	21	22.3333	24.3333	2.439e-06	1.768e-06	2.441e-06	1.206e-06	1.075e-05	2.525e-06	0.84	1.29167	1.16667	1.09944	0.233216	0.0173305
tr|Q1V438|Q1V438_VIBAL	Acetyltransferase component of pyruvate dehydrogenase complex OS=Vibrio alginolyticus 12G01 GN=V12G01_21528 PE=3 SV=1	630	65357.9		153	24	43	28	23	30	19	13	25	27	19	2.289e-06	1.374e-06	1.954e-06	1.001e-06	1.016e-06	1.692e-06	0.678571	0.565217	0.833333	0.692374	0.13459	0.154891
tr|Q1VB01|Q1VB01_VIBAL	Transaldolase OS=Vibrio alginolyticus 12G01 GN=tal PE=3 SV=1	316	34914.9		152	23	63.3	32	35	29	16	6	25	32	15.6667	3.31e-06	2.523e-06	2.746e-06	1.431e-06	5.231e-07	2.223e-06	0.5	0.171429	0.862069	0.511166	0.345456	0.0406249
tr|Q1V3Q8|Q1V3Q8_VIBAL	Protease, insulinase family protein OS=Vibrio alginolyticus 12G01 GN=V12G01_21403 PE=3 SV=1	947	106230		151	36	42.2	30	34	26	18	3	21	30	14	6.32e-07	8.189e-07	6.28e-07	2.289e-07	9.233e-08	4.478e-07	0.6	0.0882353	0.807692	0.498643	0.370283	0.0565058
tr|Q1V672|Q1V672_VIBAL	Adenylosuccinate synthetase OS=Vibrio alginolyticus 12G01 GN=purA PE=3 SV=1	438	47831.5		151	18	56.2	25	27	26	23	19	21	26	21	2.375e-06	1.699e-06	1.509e-06	1.26e-06	2.049e-06	1.404e-06	0.92	0.703704	0.807692	0.810465	0.108175	0.394482
tr|Q1V592|Q1V592_VIBAL	Putative outer membrane protein OS=Vibrio alginolyticus 12G01 GN=V12G01_03432 PE=4 SV=1	349	38024.2		150	7	21.2	23	22	18	26	11	16	21	17.6667	3.173e-06	5.315e-06	4.595e-06	3.594e-06	1.916e-06	2.445e-06	1.13043	0.5	0.888889	0.839775	0.318074	0.0709841
tr|Q1V3I6|Q1V3I6_VIBAL	Malate dehydrogenase OS=Vibrio alginolyticus 12G01 GN=mdh PE=3 SV=1	311	32263		150	20	72.7	33	23	23	24	14	22	26.3333	20	3.558e-06	3.102e-06	3.05e-06	2.998e-06	4.664e-06	3.152e-06	0.727273	0.608696	0.956522	0.764163	0.176823	0.481101
tr|Q1VET2|Q1VET2_VIBAL	Flagellar capping protein OS=Vibrio alginolyticus 12G01 GN=fliD PE=4 SV=1	664	72691.8		148	39	58.1	21	27	20	31	11	20	22.6667	20.6667	1.079e-06	7.795e-07	6.339e-07	9.246e-07	7.226e-07	6.482e-07	1.47619	0.407407	1	0.961199	0.535447	0.588527
tr|Q1VFL4|Q1VFL4_VIBAL	Outer membrane protein OmpU OS=Vibrio alginolyticus 12G01 GN=V12G01_05406 PE=4 SV=1	326	35940		144	13	37.7	27.5	31.5	22	17.5	7.5	12.5	27	12.5	5.125e-06	3.683e-06	5.505e-06	1.609e-06	2.057e-06	1.417e-06	0.636364	0.238095	0.568182	0.48088	0.213004	0.00884591
tr|Q1V799|Q1V799_VIBAL	Lysine--tRNA ligase OS=Vibrio alginolyticus 12G01 GN=lysS PE=3 SV=1	505	57503.8		141	32	53.1	27	30	22	13	6	20	26.3333	13	1.591e-06	1.548e-06	1.049e-06	6.509e-07	4.988e-07	8.413e-07	0.481481	0.2	0.909091	0.530191	0.357046	0.0647779
tr|Q1V8B5|Q1V8B5_VIBAL	Uncharacterized protein (Fragment) OS=Vibrio alginolyticus 12G01 GN=V12G01_08700 PE=4 SV=1	168	18149		141	15	94.6	26	23	25	25	13	20	24.6667	19.3333	6.649e-06	5.586e-06	8.747e-06	5.156e-06	8.306e-06	5.116e-06	0.961538	0.565217	0.8	0.775585	0.199285	0.384021
tr|Q1VF49|Q1VF49_VIBAL	Outer membrane protein OmpK OS=Vibrio alginolyticus 12G01 GN=V12G01_22178 PE=4 SV=1	265	29382		141	11	35.8	23	25	22	28	17	22	23.3333	22.3333	4.338e-06	4.505e-06	4.73e-06	3.181e-06	3.24e-06	4.122e-06	1.21739	0.68	1	0.965797	0.270323	0.207498
tr|Q1V4N1|Q1V4N1_VIBAL	2-oxoglutarate dehydrogenase, E1 component OS=Vibrio alginolyticus 12G01 GN=V12G01_15792 PE=4 SV=1	941	106371		140	32	37	29	29	25	17	8	23	27.6667	16	8.19e-07	5.336e-07	7.479e-07	2.037e-07	4.208e-07	4.763e-07	0.586207	0.275862	0.92	0.594023	0.32214	0.125156
tr|Q1VDI3|Q1VDI3_VIBAL	Acetyl-CoA acetyltransferase OS=Vibrio alginolyticus 12G01 GN=V12G01_01855 PE=3 SV=1	402	41735.5		139	20	63.2	25.5	20.5	25.5	21.5	13.5	21.5	23.8333	18.8333	2.202e-06	1.315e-06	2.297e-06	1.5e-06	1.18e-06	1.342e-06	0.843137	0.658537	0.843137	0.781604	0.106579	0.175022
tr|Q1VG14|Q1VG14_VIBAL	Putative CymC protein OS=Vibrio alginolyticus 12G01 GN=V12G01_04656 PE=4 SV=1	168	18544.1		139	8	64.3	23	26	20	18	18	26	23	20.6667	7.27e-06	9.633e-06	1.562e-05	8.241e-06	5.963e-06	9.486e-06	0.782609	0.692308	1.3	0.924972	0.327907	0.103273
tr|Q1V6I5|Q1V6I5_VIBAL	50S ribosomal protein L9 OS=Vibrio alginolyticus 12G01 GN=rplI PE=3 SV=1	150	15735.3		139	13	74.7	23.5	22.5	27	19	19	20	24.3333	19.3333	1.085e-05	7.686e-06	1.287e-05	5.985e-06	1.137e-05	7.412e-06	0.808511	0.844444	0.740741	0.797899	0.05266	0.163379
tr|Q1V7B6|Q1V7B6_VIBAL	Chitinase OS=Vibrio alginolyticus 12G01 GN=V12G01_03881 PE=3 SV=1	848	90354.4		138	18	30.1	33	30	20	20	8	13	27.6667	13.6667	1.189e-06	1.061e-06	6.83e-07	4.384e-07	1.902e-07	2.849e-07	0.606061	0.266667	0.65	0.507576	0.209787	0.0296196
tr|Q1V4M8|Q1V4M8_VIBAL	Succinyl-CoA ligase [ADP-forming] subunit alpha OS=Vibrio alginolyticus 12G01 GN=V12G01_15807 PE=3 SV=1	290	30064.4		138	15	50.3	22	24	24	23	18	21	23.3333	20.6667	5.18e-06	2.767e-06	5.244e-06	2.218e-06	2.571e-06	4.275e-06	1.04545	0.75	0.875	0.890152	0.148309	0.122287
tr|Q1VG16|Q1VG16_VIBAL	Maltoporin OS=Vibrio alginolyticus 12G01 GN=lamB PE=3 SV=1	423	46215.8		137	14	48.9	22	28	17	22	10	19	22.3333	17	2.274e-06	1.6e-06	1.89e-06	1.249e-06	1.559e-06	1.763e-06	1	0.357143	1.11765	0.82493	0.409364	0.301972
tr|Q1V6J1|Q1V6J1_VIBAL	Glucose-6-phosphate isomerase OS=Vibrio alginolyticus 12G01 GN=pgi PE=3 SV=1	550	61120.6		135	23	50.2	24	27	33	22	5	18	28	15	1.395e-06	1.171e-06	1.89e-06	6.836e-07	2.21e-07	1.183e-06	0.916667	0.185185	0.545455	0.549102	0.365754	0.0583507
tr|Q1VDI9|Q1VDI9_VIBAL	Nitrate reductase OS=Vibrio alginolyticus 12G01 GN=napA PE=3 SV=1	829	93381.4		133	34	42.5	30	21	23	23	6	22	24.6667	17	7.749e-07	4.354e-07	6.518e-07	4.251e-07	1.219e-07	4.263e-07	0.766667	0.285714	0.956522	0.669634	0.34577	0.13095
tr|Q1V9V4|Q1V9V4_VIBAL	Chitodextrinase OS=Vibrio alginolyticus 12G01 GN=V12G01_08775 PE=4 SV=1	1053	112259		133	26	32.1	25	24	20	25	8	23	23	18.6667	5.863e-07	4.879e-07	5.749e-07	5.793e-07	1.656e-07	5.115e-07	1	0.333333	1.15	0.827778	0.43472	0.361373
tr|Q1V6N8|Q1V6N8_VIBAL	DNA gyrase subunit A OS=Vibrio alginolyticus 12G01 GN=gyrA PE=3 SV=1	906	100354		132	31	39.7	27	29	21	15	9	17	25.6667	13.6667	6.644e-07	4.058e-07	6.047e-07	2.236e-07	1.786e-07	3.72e-07	0.555556	0.310345	0.809524	0.558475	0.249602	0.105734
tr|Q1V6S1|Q1V6S1_VIBAL	Pyruvate kinase OS=Vibrio alginolyticus 12G01 GN=V12G01_12198 PE=3 SV=1	470	50052.9		130	25	64.7	24	25	22	20	10	16	23.6667	15.3333	1.679e-06	1.611e-06	1.221e-06	1.484e-06	7.529e-07	9.736e-07	0.833333	0.4	0.727273	0.653535	0.225881	0.214342
tr|Q1V6R8|Q1V6R8_VIBAL	Glycerol dehydrogenase OS=Vibrio alginolyticus 12G01 GN=gldA PE=3 SV=1	360	38495.7		128	14	51.4	26	24	17	23	7	21	22.3333	17	3.549e-06	1.567e-06	1.475e-06	2.659e-06	1.119e-06	2.246e-06	0.884615	0.291667	1.23529	0.803859	0.476969	0.532128
tr|Q1V385|Q1V385_VIBAL	30S ribosomal protein S3 (Fragment) OS=Vibrio alginolyticus 12G01 GN=rpsC PE=3 SV=1	208	22917.6		128	19	75.5	16	24	20	19	21	21	20	20.3333	3.665e-06	5.373e-06	3.039e-06	2.245e-06	8.452e-06	3.523e-06	1.1875	0.875	1.05	1.0375	0.156625	0.338852
tr|Q1V4L4|Q1V4L4_VIBAL	Acetyl-coenzyme A synthetase OS=Vibrio alginolyticus 12G01 GN=acsA PE=3 SV=1	650	71887.9		128	27	45.4	24	24	23	16	7	21	23.6667	14.6667	1.295e-06	1.032e-06	9.169e-07	3.945e-07	4.139e-07	9.625e-07	0.666667	0.291667	0.913043	0.623792	0.312899	0.10996
tr|Q1VB48|Q1VB48_VIBAL	Uncharacterized protein OS=Vibrio alginolyticus 12G01 GN=V12G01_01495 PE=4 SV=1	491	55608.7		128	29	67.8	22	14	15	24	13	33	17	23.3333	1.021e-06	3.481e-07	9.203e-07	8.988e-07	8.968e-07	2.146e-06	1.09091	0.928571	2.2	1.40649	0.691974	0.116026
tr|Q1V4N6|Q1V4N6_VIBAL	Citrate synthase OS=Vibrio alginolyticus 12G01 GN=gltA PE=3 SV=1	429	48314.9		125	17	40.8	25	22	21	16	15	18	22.6667	16.3333	2.09e-06	1.44e-06	1.698e-06	8.869e-07	1.081e-06	1.552e-06	0.64	0.681818	0.857143	0.72632	0.115209	0.167566
tr|Q1V5T7|Q1V5T7_VIBAL	Isoleucine--tRNA ligase OS=Vibrio alginolyticus 12G01 GN=ileS PE=3 SV=1	942	105451		125	29	36.5	25	25	22	15	9	12	24	12	6.171e-07	6.598e-07	6.344e-07	2.488e-07	3.322e-07	3.015e-07	0.6	0.36	0.545455	0.501818	0.12581	0.0958215
tr|Q1V3G9|Q1V3G9_VIBAL	Probable cytosol aminopeptidase OS=Vibrio alginolyticus 12G01 GN=pepA PE=3 SV=1	502	54614.8		124	29	55.4	23	23	27	13	9	20	24.3333	14	1.353e-06	1.806e-06	1.707e-06	4.815e-07	4.386e-07	7.17e-07	0.565217	0.391304	0.740741	0.565754	0.174719	0.022576
tr|Q1V8K2|Q1V8K2_VIBAL	Serine--tRNA ligase OS=Vibrio alginolyticus 12G01 GN=serS PE=3 SV=1	435	48979.9		124	24	49.4	26	24	23	15	7	17	24.3333	13	2.512e-06	1.101e-06	1.662e-06	5.765e-07	7.204e-07	1.161e-06	0.576923	0.291667	0.73913	0.535907	0.226534	0.0511371
tr|Q1V531|Q1V531_VIBAL	Translation initiation factor IF-2 OS=Vibrio alginolyticus 12G01 GN=fliN PE=3 SV=1	903	99036.2		124	38	41.5	17	19	17	16	12	15	17.6667	14.3333	2.713e-07	1.953e-07	2.239e-07	1.068e-07	4.428e-07	2.166e-07	0.941176	0.631579	0.882353	0.818369	0.164417	0.618397
tr|Q1VAD2|Q1VAD2_VIBAL	GMP synthase [glutamine-hydrolyzing] OS=Vibrio alginolyticus 12G01 GN=guaA PE=3 SV=1	517	57794.2		121	26	50.5	30	22	19	16	8	13	23.6667	12.3333	1.56e-06	7.574e-07	8.244e-07	3.846e-07	8.186e-07	6.965e-07	0.533333	0.363636	0.684211	0.52706	0.160379	0.151685
tr|Q1V4S4|Q1V4S4_VIBAL	Protease DO OS=Vibrio alginolyticus 12G01 GN=V12G01_12430 PE=4 SV=1	206	21917.7		120	16	85	33	20	21	14	14	16	24.6667	14.6667	5.873e-06	3.174e-06	2.647e-06	2.151e-06	2.882e-06	2.524e-06	0.424242	0.7	0.761905	0.628716	0.179764	0.0986057
tr|Q1V7S2|Q1V7S2_VIBAL	Uncharacterized protein OS=Vibrio alginolyticus 12G01 GN=V12G01_19731 PE=4 SV=1	182	19959.6		119	7	56.6	17	29	24	21	7	17	23.3333	15	2.939e-06	2.88e-06	3.513e-06	3.014e-06	2.871e-06	2.796e-06	1.23529	0.241379	0.708333	0.728336	0.497259	0.552489
tr|Q1V2Z6|Q1V2Z6_VIBAL	50S ribosomal protein L7/L12 OS=Vibrio alginolyticus 12G01 GN=rplL PE=3 SV=1	122	12204.4		114	11	42.6	16	21	17	19	13	15	18	15.6667	8.294e-06	2.456e-05	9.403e-06	4.391e-06	5.645e-06	5.498e-06	1.1875	0.619048	0.882353	0.8963	0.284483	0.0037152
tr|Q1VAD1|Q1VAD1_VIBAL	Inosine-5'-monophosphate dehydrogenase OS=Vibrio alginolyticus 12G01 GN=guaB PE=3 SV=1	488	51751.7		114	22	50.4	22	16	22	14	10	15	20	13	9.466e-07	4.208e-07	1.363e-06	4.313e-07	7.028e-07	4.294e-07	0.636364	0.625	0.681818	0.647727	0.0300654	0.138635
tr|Q1V3K7|Q1V3K7_VIBAL	Leucine--tRNA ligase OS=Vibrio alginolyticus 12G01 GN=leuS PE=3 SV=1	857	96812.2		111	31	34.7	19	22	25	12	6	14	22	10.6667	5.446e-07	4.818e-07	9.308e-07	2.071e-07	1.527e-07	3.361e-07	0.631579	0.272727	0.56	0.488102	0.189923	0.0542529
tr|Q1V9J8|Q1V9J8_VIBAL	Valine--tRNA ligase OS=Vibrio alginolyticus 12G01 GN=valS PE=3 SV=1	952	108871		111	39	50.1	23	24	24	11	1	14	23.6667	8.66667	6.583e-07	4.154e-07	6.987e-07	1.488e-07	2.699e-08	3.241e-07	0.478261	0.0416667	0.583333	0.367754	0.287245	0.0377811
tr|Q1V501|Q1V501_VIBAL	Iron(III) ABC transporter, periplasmic iron-compound-binding protein OS=Vibrio alginolyticus 12G01 GN=V12G01_21628 PE=4 SV=1	334	37286.9		110	19	63.2	20	19	23	20	9	15	20.6667	14.6667	2.488e-06	1.755e-06	2.103e-06	1.899e-06	2.086e-06	1.88e-06	1	0.473684	0.652174	0.708619	0.26766	0.556395
tr|Q1VEA6|Q1VEA6_VIBAL	Putrescine-binding periplasmic protein OS=Vibrio alginolyticus 12G01 GN=V12G01_18257 PE=3 SV=1	343	38377.1		108	16	50.7	20	22	19	16	8	10	20.3333	11.3333	2.469e-06	1.738e-06	1.72e-06	1.394e-06	7.034e-07	9.482e-07	0.8	0.363636	0.526316	0.563317	0.220522	0.0646716
tr|Q1V5V4|Q1V5V4_VIBAL	ABC transporter, ATP-binding protein OS=Vibrio alginolyticus 12G01 GN=V12G01_13249 PE=3 SV=1	555	62226		108	25	47.2	19	20	24	15	7	17	21	13	1.174e-06	6.894e-07	1.144e-06	3.923e-07	2.731e-07	6.006e-07	0.789474	0.35	0.708333	0.615936	0.233853	0.0589203
tr|Q1V8A6|Q1V8A6_VIBAL	ATP synthase subunit beta OS=Vibrio alginolyticus 12G01 GN=atpD PE=3 SV=1	467	50793.9		107	18	53.3	18	19	21	16	10	20	19.3333	15.3333	1.93e-06	1.454e-06	1.18e-06	8.192e-07	2.535e-06	1.33e-06	0.888889	0.526316	0.952381	0.789195	0.229863	0.682984
tr|Q1V3P8|Q1V3P8_VIBAL	50S ribosomal protein L19 OS=Vibrio alginolyticus 12G01 GN=rplS PE=3 SV=1	117	13287.3		107	11	73.5	23	18	15	17	14	14	18.6667	15	1.11e-05	7.821e-06	1.05e-05	4.603e-06	6.096e-06	5.842e-06	0.73913	0.777778	0.933333	0.816747	0.102799	0.0258023
tr|Q1V5E6|Q1V5E6_VIBAL	Tail-specific protease OS=Vibrio alginolyticus 12G01 GN=V12G01_18057 PE=4 SV=1	668	75879.9		106	28	45.5	28	20	18	15	4	17	22	12	1.224e-06	7.737e-07	5.78e-07	3.872e-07	2.386e-07	4.233e-07	0.535714	0.2	0.944444	0.560053	0.372819	0.060017
tr|Q1V3E0|Q1V3E0_VIBAL	Acetyl-CoA carboxylase OS=Vibrio alginolyticus 12G01 GN=V12G01_00839 PE=4 SV=1	447	49415.2		105	23	52.1	21	20	17	12	12	15	19.3333	13	1.49e-06	7.867e-07	9.585e-07	4.246e-07	1.177e-06	7.24e-07	0.571429	0.6	0.882353	0.684594	0.171859	0.248659
tr|Q1V906|Q1V906_VIBAL	Glutamate--tRNA ligase OS=Vibrio alginolyticus 12G01 GN=gltX PE=3 SV=1	475	53551.7		103	22	49.1	18	23	20	16	6	15	20.3333	12.3333	1.116e-06	9.367e-07	9.318e-07	5.567e-07	2.157e-07	6.875e-07	0.888889	0.26087	0.75	0.633253	0.329886	0.0848162
tr|Q1VC86|Q1VC86_VIBAL	6-phosphogluconate dehydrogenase, decarboxylating OS=Vibrio alginolyticus 12G01 GN=V12G01_17402 PE=3 SV=1	482	52560.3		102	18	36.1	17	19	20	15	7	14	18.6667	12	1.095e-06	1.005e-06	1.667e-06	8.731e-07	6.224e-07	1.024e-06	0.882353	0.368421	0.7	0.650258	0.260552	0.182491
tr|Q1V7J6|Q1V7J6_VIBAL	Nucleotide sugar dehydrogenase OS=Vibrio alginolyticus 12G01 GN=V12G01_11658 PE=3 SV=1	388	43490.3		102	21	55.2	26	17	19	7	11	15	20.6667	11	2.239e-06	1.236e-06	1.06e-06	3.577e-07	1.49e-06	1.174e-06	0.269231	0.647059	0.789474	0.568588	0.268852	0.170359
tr|Q1V9N6|Q1V9N6_VIBAL	Uncharacterized protein OS=Vibrio alginolyticus 12G01 GN=V12G01_09115 PE=4 SV=1	454	50083.3		100	15	37.2	19	18	18	15	4	12	18.3333	10.3333	1.042e-06	7.063e-07	9.066e-07	7.313e-07	1.719e-07	6.774e-07	0.789474	0.222222	0.666667	0.559454	0.298437	0.154801
tr|Q1VA59|Q1VA59_VIBAL	Uncharacterized protein OS=Vibrio alginolyticus 12G01 GN=V12G01_20858 PE=4 SV=1	644	74214.3		99	28	39.6	19	22	15	16	3	14	18.6667	11	7.876e-07	7.904e-07	5.154e-07	2.435e-07	4.647e-08	4.091e-07	0.842105	0.136364	0.933333	0.637267	0.436187	0.0447311
tr|Q1V3C1|Q1V3C1_VIBAL	Secreted trypsin-like serine protease OS=Vibrio alginolyticus 12G01 GN=V12G01_15872 PE=3 SV=1	539	59051.3		99	16	42.7	17	22	18	19	7	14	19	13.3333	8.74e-07	8.192e-07	1.49e-06	1.281e-06	4.575e-07	5.883e-07	1.11765	0.318182	0.777778	0.737869	0.401224	0.263575
tr|Q1VAW9|Q1VAW9_VIBAL	Oligopeptidase A OS=Vibrio alginolyticus 12G01 GN=V12G01_10808 PE=3 SV=1	680	77067.2		99	28	48.4	23.99	16.99	20.99	10.99	5	13.99	20.6567	9.99333	1.758e-06	3.968e-07	6.877e-07	3.256e-07	1.993e-07	6.227e-07	0.458108	0.294291	0.666508	0.472969	0.186553	0.0548268
tr|Q1V9T1|Q1V9T1_VIBAL	Serine hydroxymethyltransferase OS=Vibrio alginolyticus 12G01 GN=glyA PE=1 SV=1	431	46601.8		98	22	53.6	21	19	19	14	2	13	19.6667	9.66667	2.105e-06	7.452e-07	1.212e-06	6.331e-07	2.045e-07	6.467e-07	0.666667	0.105263	0.684211	0.48538	0.329308	0.0322976
tr|Q1V6U0|Q1V6U0_VIBAL	Chaperone SurA OS=Vibrio alginolyticus 12G01 GN=surA PE=3 SV=1	427	47624.6		97	21	49.4	17	17	20	14	4	18	18	12	1.042e-06	1.019e-06	1.243e-06	5.817e-07	6.976e-07	8.071e-07	0.823529	0.235294	0.9	0.652941	0.363708	0.166198
tr|Q1V7J5|Q1V7J5_VIBAL	Capsular polysaccharide biosynthesis protein OS=Vibrio alginolyticus 12G01 GN=V12G01_11663 PE=4 SV=1	334	37313.5		97	13	54.8	19	21	19	14	7	15	19.6667	12	2.006e-06	1.703e-06	2.025e-06	1.265e-06	6.514e-07	1.322e-06	0.736842	0.333333	0.789474	0.619883	0.249551	0.0885696
tr|Q1V8Z9|Q1V8Z9_VIBAL	Polar flagellar FlgM OS=Vibrio alginolyticus 12G01 GN=V12G01_15410 PE=4 SV=1	104	11078.5		97	13	75	13	18	15	17	13	13	15.3333	14.3333	2.106e-06	3.025e-06	2.885e-06	3.97e-06	3.473e-06	2.439e-06	1.30769	0.722222	0.866667	0.965527	0.304998	0.295605
tr|Q1V4V6|Q1V4V6_VIBAL	Amino acid ABC transporter, periplasmic amino acid-binding portion OS=Vibrio alginolyticus 12G01 GN=V12G01_10121 PE=3 SV=1	248	27655.3		95	20	62.5	19	17	18	16	3	14	18	11	2.282e-06	2.923e-06	1.943e-06	2.098e-06	6.007e-07	1.983e-06	0.842105	0.176471	0.777778	0.598785	0.367146	0.135413
tr|Q1V6F3|Q1V6F3_VIBAL	Putative malate oxidoreductase OS=Vibrio alginolyticus 12G01 GN=V12G01_14855 PE=3 SV=1	425	46231.7		94	18	47.8	18	16	18	15	5	13	17.3333	11	5.788e-07	5.677e-07	5.63e-07	1.753e-07	2.323e-07	3.115e-07	0.833333	0.3125	0.722222	0.622685	0.274313	0.0835282
tr|Q1V816|Q1V816_VIBAL	Collagenase OS=Vibrio alginolyticus 12G01 GN=V12G01_06171 PE=4 SV=1	808	90993.7		93	21	34.3	18	23	14	16	0	13	18.3333	9.66667	9.134e-07	6.769e-07	4.838e-07	5.29e-07	0	3.533e-07	0.888889	0	0.928571	0.60582	0.525031	0.0754772
tr|Q1V6R9|Q1V6R9_VIBAL	Glutamine--fructose-6-phosphate aminotransferase [isomerizing] OS=Vibrio alginolyticus 12G01 GN=glmS PE=3 SV=1	610	66904.3		92	22	41.1	15	17	16	15	7	15	16	12.3333	6.48e-07	5.38e-07	6.011e-07	5.164e-07	3.832e-07	5.322e-07	1	0.411765	0.9375	0.783088	0.32309	0.411541
tr|Q1V6Y6|Q1V6Y6_VIBAL	Cold shock DNA-binding domain protein OS=Vibrio alginolyticus 12G01 GN=V12G01_06601 PE=3 SV=1	69	7561.8		92	7	53.6	12	19	13	17	11	18	14.6667	15.3333	1.537e-05	2.233e-05	1.314e-05	1.799e-05	1.046e-05	1.083e-05	1.41667	0.578947	1.38462	1.12674	0.474676	0.118389
tr|Q1V8Y5|Q1V8Y5_VIBAL	Flagellar hook-associated protein L OS=Vibrio alginolyticus 12G01 GN=flgL PE=4 SV=1	397	45241.3		91	20	50.4	14	17	12	17	5	12	14.3333	11.3333	5.746e-07	6.384e-07	5.49e-07	6.394e-07	2.348e-07	5.36e-07	1.21429	0.294118	1	0.836134	0.481473	0.411936
tr|Q1V9P4|Q1V9P4_VIBAL	Catalase-peroxidase OS=Vibrio alginolyticus 12G01 GN=katG PE=1 SV=1	724	80983.5		91	21	29.8	17	17	17	14	3	16	17	11	5.775e-07	5.428e-07	6.158e-07	3.261e-07	1.473e-07	5.499e-07	0.823529	0.176471	0.941176	0.647059	0.411765	0.175817
tr|Q1VC21|Q1VC21_VIBAL	Putative trypsin OS=Vibrio alginolyticus 12G01 GN=V12G01_17727 PE=4 SV=1	443	46808.9		90	11	27.5	13	15	14	15	8	11	14	11.3333	1.089e-06	8.251e-07	1.701e-06	8.878e-07	5.746e-07	5.016e-07	1.15385	0.533333	0.785714	0.824298	0.312051	0.10386
tr|Q1V690|Q1V690_VIBAL	Acetylornithine aminotransferase OS=Vibrio alginolyticus 12G01 GN=argD PE=1 SV=1	403	43463		90	15	44.2	15	19	21	14	6	14	18.3333	11.3333	1.326e-06	1.101e-06	1.677e-06	4.826e-07	4.346e-07	1.077e-06	0.933333	0.315789	0.666667	0.638596	0.309727	0.0688332
tr|Q1V8X7|Q1V8X7_VIBAL	Cysteine synthase OS=Vibrio alginolyticus 12G01 GN=V12G01_15520 PE=3 SV=1	322	34281		89	13	60.6	16	12	15	17	11	12	14.3333	13.3333	2.408e-06	2.321e-06	1.595e-06	1.692e-06	1.355e-06	1.383e-06	1.0625	0.916667	0.8	0.926389	0.13152	0.178006
tr|Q1V565|Q1V565_VIBAL	Aspartate--tRNA ligase OS=Vibrio alginolyticus 12G01 GN=aspS PE=3 SV=1	592	65908.5		89	23	53.4	21	20	16	7	5	11	19	7.66667	1.177e-06	7.63e-07	9.28e-07	3.677e-07	2.934e-07	2.549e-07	0.333333	0.25	0.6875	0.423611	0.232302	0.032051
tr|Q1V917|Q1V917_VIBAL	Uncharacterized protein OS=Vibrio alginolyticus 12G01 GN=V12G01_07348 PE=4 SV=1	399	43930.2		88	15	35.8	14	15	7	19	7	10	12	12	7.059e-07	8.319e-07	4.738e-07	1.158e-06	8.855e-07	1.09e-06	1.35714	0.466667	1.42857	1.08413	0.535928	0.176051
tr|Q1VA34|Q1VA34_VIBAL	Uridine phosphorylase OS=Vibrio alginolyticus 12G01 GN=V12G01_20983 PE=3 SV=1	252	27006.6		88	11	55.2	16	12	11	12	7	12	13	10.3333	2.558e-06	1.725e-06	2.202e-06	1.212e-06	1.324e-06	2.049e-06	0.75	0.583333	1.09091	0.808081	0.258724	0.181428
tr|Q1VG42|Q1VG42_VIBAL	Putative zinc protease, insulinase family protein OS=Vibrio alginolyticus 12G01 GN=V12G01_04516 PE=3 SV=1	916	102433		88	26	36.9	13	15	16	14	6	11	14.6667	10.3333	2.98e-07	4.238e-07	3.182e-07	1.519e-07	1.701e-07	2.994e-07	1.07692	0.4	0.6875	0.721474	0.339738	0.21946
tr|Q1VEA5|Q1VEA5_VIBAL	Putrescine-binding periplasmic protein OS=Vibrio alginolyticus 12G01 GN=V12G01_18262 PE=3 SV=1	345	39065.1		87	15	42.6	17	16	16	12	5	10	16.3333	9	9.995e-07	7.936e-07	9.566e-07	7.516e-07	4.094e-07	8.558e-07	0.705882	0.3125	0.625	0.547794	0.207745	0.278708
tr|Q1VA64|Q1VA64_VIBAL	Formate acetyltransferase OS=Vibrio alginolyticus 12G01 GN=V12G01_20833 PE=3 SV=1	758	84787.1		87	25	33.2	13.04	10.02	15.02	8.02	7.02	12.04	12.6933	9.02667	3.484e-07	1.875e-07	3.583e-07	2.82e-07	3.721e-07	3.154e-07	0.615031	0.700599	0.801598	0.705742	0.0933899	0.639626
tr|Q1V5I9|Q1V5I9_VIBAL	Arylsulfatase OS=Vibrio alginolyticus 12G01 GN=V12G01_09307 PE=4 SV=1	515	58440.1		87	16	34.8	15	17	14	14	6	12	15.3333	10.6667	5.238e-07	7.588e-07	5.061e-07	3.072e-07	2.104e-07	3.907e-07	0.933333	0.352941	0.857143	0.714472	0.315404	0.125726
tr|Q1VF33|Q1VF33_VIBAL	Na(+)-translocating NADH-quinone reductase subunit F OS=Vibrio alginolyticus 12G01 GN=nqrF PE=3 SV=1	407	45353.2		86	8	25.8	10	8	20	11	8	11	12.6667	10	1.746e-06	1.568e-06	3.944e-06	1.504e-06	2.388e-06	1.273e-06	1.1	1	0.55	0.883333	0.292973	0.178844
tr|Q1V6K4|Q1V6K4_VIBAL	Aspartate aminotransferase OS=Vibrio alginolyticus 12G01 GN=V12G01_16542 PE=3 SV=1	396	43203		86	20	47.7	19	13	13	11	5	12	15	9.33333	1.261e-06	1.656e-06	1.181e-06	5.923e-07	3.928e-07	8.582e-07	0.578947	0.384615	0.923077	0.62888	0.272681	0.0556174
tr|Q1VEZ3|Q1VEZ3_VIBAL	Ribosome-recycling factor OS=Vibrio alginolyticus 12G01 GN=frr PE=3 SV=1	185	20597.1		85	15	57.8	14.5	17.5	17.5	9	9	11	16.5	9.66667	3.975e-06	2.68e-06	2.254e-06	1.006e-06	1.684e-06	1.581e-06	0.62069	0.514286	0.628571	0.587849	0.0638294	0.0371265
tr|Q1V5X6|Q1V5X6_VIBAL	Protein TolB OS=Vibrio alginolyticus 12G01 GN=tolB PE=3 SV=1	442	48880.2		85	22	49.5	17	14	13	12	4	10	14.6667	8.66667	1.231e-06	6.748e-07	6.69e-07	4.481e-07	7.995e-08	5.3e-07	0.705882	0.285714	0.769231	0.586942	0.262787	0.0614793
tr|Q1V7T7|Q1V7T7_VIBAL	NAD-dependent malic enzyme OS=Vibrio alginolyticus 12G01 GN=maeA PE=3 SV=1	562	62407.7		84	22	44.5	20	12	19	12	3	11	17	8.66667	7.995e-07	4.402e-07	8.432e-07	9.515e-07	1.526e-07	6.078e-07	0.6	0.25	0.578947	0.476316	0.196278	0.434334
tr|Q1VCY0|Q1VCY0_VIBAL	Putative flagellin OS=Vibrio alginolyticus 12G01 GN=V12G01_02870 PE=4 SV=1	346	37968.8		83	18	50.9	28	19	12	6	8	8	19.6667	7.33333	3.618e-06	1.282e-06	6.549e-07	1.23e-07	8.7e-07	5.126e-07	0.214286	0.421053	0.666667	0.434002	0.226468	0.0116982
tr|Q1V353|Q1V353_VIBAL	Phosphoglycerate kinase (Fragment) OS=Vibrio alginolyticus 12G01 GN=V12G01_13944 PE=3 SV=1	319	33679		83	14	48.6	15	16	14	11	7	14	15	10.6667	9.129e-07	1.019e-06	8.935e-07	5.194e-07	3.553e-07	6.309e-07	0.733333	0.4375	1	0.723611	0.281376	0.110478
tr|Q1VDL3|Q1VDL3_VIBAL	Phenylalanine--tRNA ligase beta subunit OS=Vibrio alginolyticus 12G01 GN=pheT PE=3 SV=1	801	87379.9		83	23	32.7	15	17	16	11	4	13	16	9.33333	1.354e-06	4.277e-07	6.215e-07	3.413e-07	2.259e-07	5.477e-07	0.733333	0.235294	0.8125	0.593709	0.31291	0.0848927
tr|Q1VBU6|Q1VBU6_VIBAL	Uncharacterized protein OS=Vibrio alginolyticus 12G01 GN=V12G01_07548 PE=4 SV=1	497	55555.4		82	22	45.7	22	14	10	9	2	11	15.3333	7.33333	1.097e-06	4.918e-07	3.419e-07	2.408e-07	4.95e-08	3.561e-07	0.409091	0.142857	1.1	0.550649	0.494024	0.0474644
tr|Q1V7R0|Q1V7R0_VIBAL	Putative reductase V12G01_19791 OS=Vibrio alginolyticus 12G01 GN=V12G01_19791 PE=3 SV=1	400	44077.2		82	16	41.2	19	15	12	14	1	11	15.3333	8.66667	1.132e-06	9.003e-07	1.076e-06	3.634e-07	7.963e-09	6.105e-07	0.736842	0.0666667	0.916667	0.573392	0.447953	0.0286206
tr|Q1VFV5|Q1VFV5_VIBAL	UPF0319 protein V12G01_04951 OS=Vibrio alginolyticus 12G01 GN=V12G01_04951 PE=3 SV=1	223	24513.3		82	12	70.9	15	18	19	10	6	11	17.3333	9	2.464e-06	2.64e-06	1.945e-06	8.579e-07	6.736e-07	8.845e-07	0.666667	0.333333	0.578947	0.526316	0.172787	0.0162976
tr|Q1VAH9|Q1VAH9_VIBAL	Phosphoribosylformylglycinamidine synthase OS=Vibrio alginolyticus 12G01 GN=purL PE=3 SV=1	1297	141319		82	30	31.4	15	19	17	9	0	8	17	5.66667	2.24e-07	2.445e-07	3.564e-07	1.299e-07	0	1.174e-07	0.6	0	0.470588	0.356863	0.315753	0.0722253
tr|Q1V3H6|Q1V3H6_VIBAL	Deacetylase DA1 OS=Vibrio alginolyticus 12G01 GN=V12G01_14129 PE=4 SV=1	427	47400.7		81	9	23.4	17	10	12	19	6	11	13	12	1.185e-06	8.826e-07	1.383e-06	8.31e-07	7.391e-07	7.795e-07	1.11765	0.6	0.916667	0.878105	0.260969	0.203834
tr|Q1V8F3|Q1V8F3_VIBAL	Heme receptor OS=Vibrio alginolyticus 12G01 GN=V12G01_08510 PE=3 SV=1	712	79029.8		80	25	44.2	17	16	18	12	3	7	17	7.33333	8.1e-07	4.497e-07	8.405e-07	2.459e-07	8.983e-08	3.127e-07	0.705882	0.1875	0.388889	0.427424	0.261331	0.0390988
tr|Q1V694|Q1V694_VIBAL	Cyclic AMP receptor protein OS=Vibrio alginolyticus 12G01 GN=V12G01_14955 PE=4 SV=1	210	23704.4		80	12	53.8	13	17	16	10	10	11	15.3333	10.3333	1.602e-06	2.678e-06	1.958e-06	8.067e-07	2.114e-06	1.802e-06	0.769231	0.588235	0.6875	0.681655	0.0906392	0.241739
tr|Q1V491|Q1V491_VIBAL	2',3'-cyclic nucleotide 2'-phosphodiesterase/3'-nucleotidase bifunctional periplasmic protein OS=Vibrio alginolyticus 12G01 GN=cpdB PE=3 SV=1	653	72739.6		79	22	41.7	16	14	13	11	5	7	14.3333	7.66667	5.625e-07	4.474e-07	4.366e-07	2.37e-07	1.157e-07	2.359e-07	0.6875	0.357143	0.538462	0.527701	0.165441	0.0858491
tr|Q1VAA1|Q1VAA1_VIBAL	Isocitrate lyase OS=Vibrio alginolyticus 12G01 GN=V12G01_13075 PE=4 SV=1	437	48217.7		79	18	41.6	17	15	16	14	7	10	16	10.3333	9.369e-07	9.537e-07	9.939e-07	5.723e-07	4.395e-07	5.561e-07	0.823529	0.466667	0.625	0.638399	0.178808	0.116451
tr|Q1V5E4|Q1V5E4_VIBAL	Aminopeptidase N OS=Vibrio alginolyticus 12G01 GN=V12G01_18067 PE=4 SV=1	868	98406.7		79	27	36.9	15	15	17	8	2	6	15.6667	5.33333	3.897e-07	2.66e-07	3.975e-07	8.259e-08	7.366e-08	2.077e-07	0.533333	0.133333	0.352941	0.339869	0.20032	0.077152
tr|Q1V5N2|Q1V5N2_VIBAL	Alanine--tRNA ligase OS=Vibrio alginolyticus 12G01 GN=alaS PE=3 SV=1	860	94069.2		78	28	38.8	24	16	9	7	4	5	16.3333	5.33333	5.164e-07	1.98e-07	2.196e-07	5.202e-08	1.269e-07	8.881e-08	0.291667	0.25	0.555556	0.365741	0.165699	0.0637109
tr|Q1V376|Q1V376_VIBAL	50S ribosomal protein L6 OS=Vibrio alginolyticus 12G01 GN=rplF PE=3 SV=1	177	18771.1		77	11	70.1	8	12	12	9	12	14	10.6667	11.6667	1.996e-06	1.545e-06	2.191e-06	1.515e-06	3.3e-06	1.677e-06	1.125	1	1.16667	1.09722	0.0867361	0.48003
tr|Q1V4P6|Q1V4P6_VIBAL	10 kDa chaperonin OS=Vibrio alginolyticus 12G01 GN=groS PE=3 SV=1	96	10261.5		77	7	83.3	9	9	12	13	9	13	10	11.6667	3.143e-06	2.839e-06	3.635e-06	2.465e-06	4.801e-06	3.408e-06	1.44444	1	1.08333	1.17593	0.236247	0.488825
tr|Q1V8T7|Q1V8T7_VIBAL	Glutamine--tRNA ligase OS=Vibrio alginolyticus 12G01 GN=glnS PE=3 SV=1	556	63856.8		76	21	35.4	15	17	17	9	3	9	16.3333	7	5.376e-07	4.93e-07	8.081e-07	2.217e-07	2.327e-07	2.25e-07	0.6	0.176471	0.529412	0.435294	0.226909	0.0617981
tr|Q1VEY8|Q1VEY8_VIBAL	Outer membrane protein assembly factor BamA OS=Vibrio alginolyticus 12G01 GN=bamA PE=3 SV=1	804	90220.6		76	21	30.8	15	17	16	6	3	12	16	7	5.25e-07	4.213e-07	5.408e-07	1.402e-07	1.925e-07	3.508e-07	0.4	0.176471	0.75	0.442157	0.289079	0.109645
tr|Q1VDI4|Q1VDI4_VIBAL	Uncharacterized protein OS=Vibrio alginolyticus 12G01 GN=V12G01_01850 PE=4 SV=1	115	13161.7		75	9	83.5	12	14	9	9	3	13	11.6667	8.33333	1.658e-06	1.722e-06	1.087e-06	1.684e-06	4.659e-07	1.855e-06	0.75	0.214286	1.44444	0.80291	0.616784	0.51793
tr|Q1VER9|Q1VER9_VIBAL	Polar flagellar hook-length control protein FliK OS=Vibrio alginolyticus 12G01 GN=V12G01_22828 PE=4 SV=1	617	66444.3		75	19	38.7	15	16	13	13	0	10	14.6667	7.66667	5.388e-07	5.438e-07	4.798e-07	3.704e-07	0	2.705e-07	0.866667	0	0.769231	0.545299	0.474749	0.0839447
tr|Q1V4L8|Q1V4L8_VIBAL	Arginine--tRNA ligase OS=Vibrio alginolyticus 12G01 GN=argS PE=3 SV=1	577	64065.3		75	23	43.7	10	15	15	9	2	7	13.3333	6	3.896e-07	4.517e-07	3.856e-07	1.714e-07	9.589e-08	2.77e-07	0.9	0.133333	0.466667	0.5	0.384419	0.112833
tr|Q1VA40|Q1VA40_VIBAL	Uncharacterized protein OS=Vibrio alginolyticus 12G01 GN=V12G01_20953 PE=4 SV=1	196	21806.9		75	8	56.1	13	17	14	9	10	7	14.6667	8.66667	2.937e-06	1.554e-06	3.846e-06	1.32e-06	1.639e-06	2.014e-06	0.692308	0.588235	0.5	0.593514	0.0962625	0.085509
tr|Q1V5F9|Q1V5F9_VIBAL	Amino acid ABC transporter, periplasmic amino acid-binding protein OS=Vibrio alginolyticus 12G01 GN=V12G01_17992 PE=4 SV=1	342	36763.6		75	17	45.3	14	7	17	14	4	10	12.6667	9.33333	1.122e-06	3.775e-07	1.257e-06	1.235e-06	5.694e-07	9.393e-07	1	0.571429	0.588235	0.719888	0.24273	0.707792
tr|Q1V596|Q1V596_VIBAL	Biosynthetic arginine decarboxylase OS=Vibrio alginolyticus 12G01 GN=speA PE=1 SV=1	640	72285.6		73	15	25	14	16	13	11	6	11	14.3333	9.33333	8.171e-07	5.194e-07	4.966e-07	2.832e-07	1.856e-07	4.521e-07	0.785714	0.375	0.846154	0.668956	0.256361	0.120434
tr|Q1V8Y7|Q1V8Y7_VIBAL	Flagellar biosynthesis protein FlgJ OS=Vibrio alginolyticus 12G01 GN=V12G01_15470 PE=4 SV=1	307	34511.8		72	15	62.2	13	14	8	14	8	10	11.6667	10.6667	7.756e-07	5.596e-07	5.51e-07	7.039e-07	4.638e-07	4.457e-07	1.07692	0.571429	1.25	0.966117	0.352595	0.495664
tr|Q1V8Z1|Q1V8Z1_VIBAL	Polar flagellar FlgF OS=Vibrio alginolyticus 12G01 GN=V12G01_15450 PE=4 SV=1	249	27014.5		72	11	57.4	12	16	10	12	6	13	12.6667	10.3333	1.085e-06	1.151e-06	9.121e-07	1.276e-06	6.253e-07	1.029e-06	1	0.375	1.3	0.891667	0.47192	0.599061
tr|Q1V8J3|Q1V8J3_VIBAL	Uncharacterized protein OS=Vibrio alginolyticus 12G01 GN=V12G01_08310 PE=4 SV=1	124	13664		71	4	45.2	10	12	17	8	6	8	13	7.33333	4.201e-06	1.889e-06	3.745e-06	3.437e-06	2.031e-06	2.575e-06	0.8	0.5	0.470588	0.590196	0.18229	0.298461
tr|Q1V4G4|Q1V4G4_VIBAL	Stringent starvation protein A OS=Vibrio alginolyticus 12G01 GN=sspA PE=3 SV=1	211	24371.6		71	14	54	17	11	10	10	8	9	12.6667	9	5.372e-06	1.964e-06	1.437e-06	1.233e-06	1.445e-06	1.405e-06	0.588235	0.727273	0.9	0.738503	0.156185	0.0341594
tr|Q1VFJ6|Q1VFJ6_VIBAL	Purine nucleoside phosphorylase DeoD-type OS=Vibrio alginolyticus 12G01 GN=deoD PE=3 SV=1	236	25694		71	13	64.4	14	13	13	9	6	9	13.3333	8	1.554e-06	1.042e-06	1.141e-06	1.916e-06	1.303e-06	1.674e-06	0.642857	0.461538	0.692308	0.598901	0.121502	0.275911
tr|Q1V8Y1|Q1V8Y1_VIBAL	Glucose-specific PTS system enzyme IIA component OS=Vibrio alginolyticus 12G01 GN=V12G01_15500 PE=4 SV=1	169	17979.4		70	7	43.8	11	11	11	8	10	11	11	9.66667	2.822e-06	3.164e-06	4.29e-06	2.01e-06	4.357e-06	2.609e-06	0.727273	0.909091	1	0.878788	0.138866	0.41251
tr|Q1VEU7|Q1VEU7_VIBAL	4-hydroxy-tetrahydrodipicolinate synthase OS=Vibrio alginolyticus 12G01 GN=dapA PE=3 SV=1	292	31373.2		70	16	64.7	16	13	13	10	4	9	14	7.66667	1.616e-06	8.053e-07	9.976e-07	3.72e-07	5.509e-07	1.028e-06	0.625	0.307692	0.692308	0.541667	0.205403	0.122491
tr|Q1VA35|Q1VA35_VIBAL	Uncharacterized protein OS=Vibrio alginolyticus 12G01 GN=V12G01_20978 PE=4 SV=1	386	43953.7		70	23	51.6	13	15	14	9	4	9	14	7.33333	1.182e-06	9.427e-07	1.195e-06	4.747e-07	2.612e-07	6.881e-07	0.692308	0.266667	0.642857	0.533944	0.232786	0.0567906
tr|Q1V5G8|Q1V5G8_VIBAL	Iron(III) ABC transporter, periplasmic iron-compound-binding protein OS=Vibrio alginolyticus 12G01 GN=V12G01_09412 PE=4 SV=1	302	33689.9		70	15	51.7	16	13	18	11	3	8	15.6667	7.33333	1.797e-06	7.117e-07	1.858e-06	4.348e-07	1.987e-07	7.164e-07	0.6875	0.230769	0.444444	0.454238	0.228523	0.0205441
tr|Q1V4R6|Q1V4R6_VIBAL	2,3-bisphosphoglycerate-independent phosphoglycerate mutase OS=Vibrio alginolyticus 12G01 GN=gpmI PE=3 SV=1	510	55317.6		69	15	33.3	15	13	9	10	8	11	12.3333	9.66667	1.262e-06	5.799e-07	6.944e-07	3.453e-07	6.377e-07	6.743e-07	0.666667	0.615385	1.22222	0.834758	0.336532	0.201632
tr|Q1V7I2|Q1V7I2_VIBAL	ATP-dependent protease ATPase subunit HslU OS=Vibrio alginolyticus 12G01 GN=hslU PE=3 SV=1	443	49902.9		69	27	48.8	23.5	10.5	4.5	3	8	7	12.8333	6	1.154e-06	3.302e-07	1.361e-07	6.168e-08	1.14e-06	2.173e-07	0.12766	0.761905	1.55556	0.81504	0.715429	0.537343
tr|Q1V7R7|Q1V7R7_VIBAL	Uncharacterized protein OS=Vibrio alginolyticus 12G01 GN=V12G01_19756 PE=4 SV=1	170	19731.9		68	12	54.1	11	11	12	10	9	10	11.3333	9.66667	2.335e-06	1.424e-06	2.29e-06	1.579e-06	1.411e-06	2.733e-06	0.909091	0.818182	0.833333	0.853535	0.0487053	0.605717
tr|Q1V8J1|Q1V8J1_VIBAL	Molybdenum ABC transporter, periplasmic molybdenum-binding protein OS=Vibrio alginolyticus 12G01 GN=V12G01_08320 PE=4 SV=1	251	27445		68	12	57.8	12	11	11	12	7	10	11.3333	9.66667	1.564e-06	1.329e-06	1.212e-06	1.123e-06	8.136e-07	8.222e-07	1	0.636364	0.909091	0.848485	0.189242	0.182865
tr|Q1V311|Q1V311_VIBAL	Serine hydroxymethyltransferase OS=Vibrio alginolyticus 12G01 GN=glyA PE=1 SV=1	416	45468.7		67	18	46.2	12	8	15	10	7	9	11.6667	8.66667	3.497e-07	2.698e-07	7.257e-07	1.825e-07	3.513e-07	2.653e-07	0.833333	0.875	0.6	0.769444	0.148215	0.197921
tr|Q1V4N3|Q1V4N3_VIBAL	Succinate dehydrogenase catalytic subunit OS=Vibrio alginolyticus 12G01 GN=sdhA PE=4 SV=1	588	64346.5		67	20	42.9	10	10	13	8	8	13	11	9.66667	3.083e-07	1.666e-07	3.438e-07	1.5e-07	6.664e-07	2.839e-07	0.8	0.8	1	0.866667	0.11547	0.382971
tr|Q1V3M3|Q1V3M3_VIBAL	Putative phosphomannomutase OS=Vibrio alginolyticus 12G01 GN=V12G01_06521 PE=3 SV=1	564	62054		66	20	42	7	16	14	6	3	8	12.3333	5.66667	2.927e-07	8.318e-07	6.251e-07	2.029e-07	7.312e-08	6.67e-07	0.857143	0.1875	0.571429	0.53869	0.33602	0.145135
tr|Q1VEU6|Q1VEU6_VIBAL	Outer membrane protein assembly factor BamC OS=Vibrio alginolyticus 12G01 GN=bamC PE=1 SV=1	339	38185.5		66	14	54.6	13	15	12	13	2	10	13.3333	8.33333	1.246e-06	9.377e-07	1.103e-06	6.341e-07	1.511e-07	5.03e-07	1	0.133333	0.833333	0.655556	0.459871	0.0451307
tr|Q1VEZ4|Q1VEZ4_VIBAL	Uridylate kinase OS=Vibrio alginolyticus 12G01 GN=pyrH PE=3 SV=1	241	26063.4		66	10	51.9	13	11	11	7	4	9	11.6667	6.66667	1.813e-06	8.562e-07	9.514e-07	5.793e-07	6.502e-07	8.678e-07	0.538462	0.363636	0.818182	0.573427	0.229281	0.12573
tr|Q1V4N9|Q1V4N9_VIBAL	Phosphoglucomutase OS=Vibrio alginolyticus 12G01 GN=V12G01_15752 PE=3 SV=1	548	59414		66	19	41.1	13	15	15	9	2	6	14.3333	5.66667	6.211e-07	5.301e-07	6.789e-07	3.407e-07	1.591e-07	2.734e-07	0.692308	0.133333	0.4	0.408547	0.279585	0.0805909
tr|Q1VAC4|Q1VAC4_VIBAL	Histidine--tRNA ligase OS=Vibrio alginolyticus 12G01 GN=hisS PE=3 SV=1	422	47196.7		66	19	57.1	14	16	13	7	2	7	14.3333	5.33333	1.483e-06	4.811e-07	6.158e-07	1.99e-07	1.071e-07	3.402e-07	0.5	0.125	0.538462	0.387821	0.22842	0.0221084
tr|Q1V3A5|Q1V3A5_VIBAL	2-dehydro-3-deoxyphosphooctonate aldolase OS=Vibrio alginolyticus 12G01 GN=kdsA PE=3 SV=1	283	30784.7		65	16	52.7	12	11	14	8	4	9	12.3333	7	7.694e-07	9.188e-07	1.664e-06	6.39e-07	7.041e-07	1.05e-06	0.666667	0.363636	0.642857	0.55772	0.168502	0.24156
tr|Q1V9T3|Q1V9T3_VIBAL	Aminomethyltransferase OS=Vibrio alginolyticus 12G01 GN=V12G01_08880 PE=3 SV=1	372	40235.7		65	14	49.2	15	10	12	8	4	14	12.3333	8.66667	8.886e-07	4.667e-07	8.156e-07	5.027e-07	4.85e-07	8.449e-07	0.533333	0.4	1.16667	0.7	0.409607	0.467158
tr|Q1VF70|Q1VF70_VIBAL	Glycerophosphoryl diester phosphodiesterase OS=Vibrio alginolyticus 12G01 GN=V12G01_22073 PE=4 SV=1	351	39975.1		65	15	51.6	12	12	17	7	2	8	13.6667	5.66667	9.526e-07	1.178e-06	1.32e-06	6.463e-07	1.381e-07	8.13e-07	0.583333	0.166667	0.470588	0.406863	0.215519	0.067745
tr|Q1VB88|Q1VB88_VIBAL	Uncharacterized protein OS=Vibrio alginolyticus 12G01 GN=V12G01_01295 PE=4 SV=1	414	45488.3		65	15	45.4	12	13	12	10	4	6	12.3333	6.66667	6.009e-07	6.609e-07	9.046e-07	3.117e-07	3.054e-07	3.729e-07	0.833333	0.307692	0.5	0.547009	0.265955	0.0865335
tr|Q1VCT7|Q1VCT7_VIBAL	Alkaline serine protease OS=Vibrio alginolyticus 12G01 GN=V12G01_03085 PE=4 SV=1	676	71341.5		64	15	33.1	11	12	9	11	6	7	10.6667	8	4.307e-07	3.399e-07	3.534e-07	3.337e-07	1.722e-07	2.399e-07	1	0.5	0.777778	0.759259	0.250514	0.275095
tr|Q1VDL2|Q1VDL2_VIBAL	Phenylalanine--tRNA ligase alpha subunit OS=Vibrio alginolyticus 12G01 GN=pheS PE=3 SV=1	327	37009.8		64	15	43.1	12	14	14	6	5	8	13.3333	6.33333	1.088e-06	8.424e-07	1.098e-06	4.863e-07	2.32e-07	6.358e-07	0.5	0.357143	0.571429	0.47619	0.109109	0.0675707
tr|Q1V8J5|Q1V8J5_VIBAL	Uncharacterized protein OS=Vibrio alginolyticus 12G01 GN=V12G01_08300 PE=4 SV=1	227	25654.6		64	18	58.1	12	13	16	12	0	7	13.6667	6.33333	6.301e-07	4.73e-07	8.77e-07	7.229e-07	0	3.304e-07	1	0	0.4375	0.479167	0.5013	0.132697
tr|Q1VAG5|Q1VAG5_VIBAL	Protein GrpE OS=Vibrio alginolyticus 12G01 GN=grpE PE=3 SV=1	219	24654.4		64	14	39.3	11	11	15	7	7	8	12.3333	7.33333	1.027e-06	6.949e-07	1.234e-06	3.267e-07	1.721e-06	4.831e-07	0.636364	0.636364	0.533333	0.60202	0.0594846	0.467486
tr|Q1VG95|Q1VG95_VIBAL	Putative proline dehydrogenase OS=Vibrio alginolyticus 12G01 GN=V12G01_04251 PE=3 SV=1	1043	115321		64	25	33.6	13	9	19	6	0	6	13.6667	4	2.53e-07	9.695e-08	2.554e-07	3.446e-08	0	1.373e-07	0.461538	0	0.315789	0.259109	0.235932	0.0808247
tr|Q1V693|Q1V693_VIBAL	Uncharacterized protein OS=Vibrio alginolyticus 12G01 GN=V12G01_14960 PE=4 SV=1	263	29438.7		64	8	41.4	14	10	7	9	5	5	10.3333	6.33333	2.183e-06	1.154e-06	7.977e-07	8.885e-07	8.678e-07	1.288e-06	0.642857	0.5	0.714286	0.619048	0.109109	0.251192
tr|Q1V8L9|Q1V8L9_VIBAL	Adenylosuccinate lyase OS=Vibrio alginolyticus 12G01 GN=V12G01_20226 PE=4 SV=1	456	51695.6		63	19	41.7	10	14	10	8	7	9	11.3333	8	7.919e-07	8.354e-07	6.604e-07	3.723e-07	3.752e-07	5.251e-07	0.8	0.5	0.9	0.733333	0.208167	0.139022
tr|Q1V5V9|Q1V5V9_VIBAL	Putative sigma-54 modulation protein OS=Vibrio alginolyticus 12G01 GN=V12G01_13224 PE=4 SV=1	108	12382.5		63	10	63	10	11	8	6	10	10	9.66667	8.66667	3.045e-06	2.491e-06	1.718e-06	4.882e-07	4.1e-06	2.107e-06	0.6	0.909091	1.25	0.919697	0.32513	0.546431
tr|Q1VEY7|Q1VEY7_VIBAL	Chaperone protein skp OS=Vibrio alginolyticus 12G01 GN=V12G01_22488 PE=3 SV=1	190	21174.3		61	11	59.5	7	8	8	8	6	8	7.66667	7.33333	1.952e-06	1.284e-06	1.246e-06	6.213e-07	1.834e-06	1.647e-06	1.14286	0.75	1	0.964286	0.198849	0.553343
tr|Q1VG48|Q1VG48_VIBAL	Ferric vibrioferrin receptor OS=Vibrio alginolyticus 12G01 GN=V12G01_04486 PE=3 SV=1	712	79095.1		61	18	35.3	14	15	15	6	0	3	14.6667	3	3.562e-07	2.529e-07	4.538e-07	5.724e-08	0	5.812e-08	0.428571	0	0.2	0.209524	0.214444	0.0177556
tr|Q1V359|Q1V359_VIBAL	Uncharacterized protein (Fragment) OS=Vibrio alginolyticus 12G01 GN=V12G01_13914 PE=4 SV=1	219	24094.1		60	12	49.8	13	11	14	7	5	8	12.6667	6.66667	2.478e-06	1.02e-06	1.76e-06	1.485e-06	1.919e-06	1.686e-06	0.538462	0.454545	0.571429	0.521479	0.0602639	0.656349
tr|Q1V379|Q1V379_VIBAL	50S ribosomal protein L5 OS=Vibrio alginolyticus 12G01 GN=rplE PE=3 SV=1	179	20123.6		60	9	59.8	8	8	8	8	11	10	8	9.66667	3.929e-06	2.483e-06	1.679e-06	1.467e-06	6.644e-06	2.514e-06	1	1.375	1.25	1.20833	0.190941	0.210363
tr|Q1VE41|Q1VE41_VIBAL	Uncharacterized protein OS=Vibrio alginolyticus 12G01 GN=V12G01_18582 PE=4 SV=1	160	17091.4		60	3	19.4	8	10	8	9	10	12	8.66667	10.3333	9.639e-06	3.899e-06	2.222e-05	9.225e-06	1.069e-05	2.199e-05	1.125	1	1.5	1.20833	0.260208	0.248825
tr|Q1V6A3|Q1V6A3_VIBAL	Peptidyl-prolyl cis-trans isomerase OS=Vibrio alginolyticus 12G01 GN=V12G01_14910 PE=4 SV=1	183	19574.1		60	5	46.4	9	9	13	11	8	6	10.3333	8.33333	2.371e-06	2.505e-06	2.333e-06	1.488e-06	1.057e-06	1.063e-06	1.22222	0.888889	0.461538	0.85755	0.381309	0.0509713
tr|Q1V8Y0|Q1V8Y0_VIBAL	Phosphoenolpyruvate-protein phosphotransferase OS=Vibrio alginolyticus 12G01 GN=V12G01_15505 PE=3 SV=1	574	63523.5		59	20	37.8	13	7	10	6	8	5	10	6.33333	4.298e-07	1.999e-07	3.511e-07	1.22e-07	2.926e-07	1.253e-07	0.461538	1.14286	0.5	0.701465	0.38274	0.188727
tr|Q1VAB9|Q1VAB9_VIBAL	Peptidase B OS=Vibrio alginolyticus 12G01 GN=pepB PE=3 SV=1	432	46617.3		59	15	55.6	9	10	11	6	2	5	10	4.33333	5.134e-07	7.211e-07	6.847e-07	1.783e-07	6.605e-08	2.077e-07	0.666667	0.2	0.454545	0.440404	0.233655	0.0255983
tr|Q1V6W9|Q1V6W9_VIBAL	Alcohol dehydrogenase OS=Vibrio alginolyticus 12G01 GN=V12G01_06686 PE=4 SV=1	382	40467.4		58	15	45.5	13	10	12	10	1	8	11.6667	6.33333	7.575e-07	4.555e-07	5.057e-07	2.251e-07	1.361e-07	3.772e-07	0.769231	0.1	0.666667	0.511966	0.36044	0.0863634
tr|Q1V7X8|Q1V7X8_VIBAL	Uncharacterized protein OS=Vibrio alginolyticus 12G01 GN=V12G01_06361 PE=4 SV=1	227	25782.9		58	9	48.9	10	10	8	13	6	4	9.33333	7.66667	8.37e-07	9.067e-07	7.31e-07	1.198e-06	9.401e-07	6.157e-07	1.3	0.6	0.5	0.8	0.43589	0.560633
tr|Q1V3V0|Q1V3V0_VIBAL	Trehalose-6-phosphate hydrolase OS=Vibrio alginolyticus 12G01 GN=V12G01_12470 PE=4 SV=1	561	64839.5		58	16	33.9	10	10	14	7	2	5	11.3333	4.66667	5.381e-07	3.096e-07	4.373e-07	2.167e-07	1.394e-07	2.654e-07	0.7	0.2	0.357143	0.419048	0.255684	0.131639
tr|Q1VA77|Q1VA77_VIBAL	Porin, putative OS=Vibrio alginolyticus 12G01 GN=V12G01_20768 PE=4 SV=1	359	39766		58	11	40.7	12	12	9	9	3	8	11	6.66667	7.432e-07	8.96e-07	5.9e-07	4.24e-07	7.002e-08	4.481e-07	0.75	0.25	0.888889	0.62963	0.336023	0.0718342
tr|Q1V704|Q1V704_VIBAL	Uncharacterized protein OS=Vibrio alginolyticus 12G01 GN=V12G01_16152 PE=4 SV=1	1169	132356		58	27	26.4	1	0	1	24	9	18	0.666667	17	5.708e-09	0	9.445e-09	3.254e-07	1.535e-07	3.186e-07	24		18	21	4.24264	0.00899894
tr|Q1V321|Q1V321_VIBAL	50S ribosomal protein L2 (Fragment) OS=Vibrio alginolyticus 12G01 GN=V12G01_11783 PE=4 SV=1	93	10397.6		57	9	60.2	7	8	11	9	7	9	8.66667	8.33333	3.598e-06	3.319e-06	5.708e-06	3.049e-06	2.807e-06	4.33e-06	1.28571	0.875	0.818182	0.992965	0.255115	0.257441
tr|Q1V325|Q1V325_VIBAL	30S ribosomal protein S10 OS=Vibrio alginolyticus 12G01 GN=rpsJ PE=3 SV=1	103	11731.5		57	10	78.6	7	7	7	5	17	9	7	10.3333	6.223e-06	1.395e-06	1.244e-06	1.239e-06	1.843e-05	5.8e-06	0.714286	2.42857	1.28571	1.47619	0.872872	0.00414028
tr|Q1V3V1|Q1V3V1_VIBAL	Uncharacterized protein OS=Vibrio alginolyticus 12G01 GN=V12G01_12465 PE=4 SV=1	299	33377.1		57	7	14.7	8	9	8	10	6	9	8.33333	8.33333	1.341e-06	1.599e-06	2.684e-06	1.078e-06	5.81e-07	9.432e-07	1.25	0.666667	1.125	1.01389	0.30713	0.0472434
tr|Q1V8H9|Q1V8H9_VIBAL	Transcriptional regulator OS=Vibrio alginolyticus 12G01 GN=V12G01_08380 PE=4 SV=1	220	24981.2		57	11	43.2	10	12	11	9	5	9	11	7.66667	2.146e-06	1.552e-06	9.549e-07	6.934e-07	5.249e-07	9.426e-07	0.9	0.416667	0.818182	0.711616	0.258689	0.0556174
tr|Q1V450|Q1V450_VIBAL	ATP-dependent Clp protease ATP-binding subunit ClpX OS=Vibrio alginolyticus 12G01 GN=clpX PE=3 SV=1	426	46746.2		57	15	36.4	13	7	10	6	9	9	10	8	8.459e-07	4.015e-07	3.704e-07	1.722e-07	1.181e-06	6.439e-07	0.461538	1.28571	0.9	0.882418	0.412369	0.42976
tr|Q1V4E1|Q1V4E1_VIBAL	Vitamin B12 transporter BtuB OS=Vibrio alginolyticus 12G01 GN=btuB PE=3 SV=1	611	68241.4		57	16	36.8	11	11	9	10	1	7	10.3333	6	5.32e-07	3.057e-07	4.167e-07	2.704e-07	2.619e-09	3.318e-07	0.909091	0.0909091	0.777778	0.592593	0.439404	0.132349
tr|Q1VFN1|Q1VFN1_VIBAL	L-threonine 3-dehydrogenase OS=Vibrio alginolyticus 12G01 GN=tdh PE=3 SV=1	343	37693.1		57	9	35.3	9	9	10	7	4	10	9.33333	7	6.575e-07	5.489e-07	1.837e-06	4.133e-07	8.879e-07	1.34e-06	0.777778	0.444444	1	0.740741	0.279623	0.485768
tr|Q1VFS4|Q1VFS4_VIBAL	LafE OS=Vibrio alginolyticus 12G01 GN=V12G01_05106 PE=4 SV=1	357	38326.7		57	11	35.6	12	16	11	7	3	4	13	4.66667	7.774e-07	8.692e-07	7.743e-07	2.83e-07	1.677e-07	1.177e-07	0.583333	0.1875	0.363636	0.378157	0.198316	0.021135
tr|Q1VC88|Q1VC88_VIBAL	Glucose-6-phosphate 1-dehydrogenase OS=Vibrio alginolyticus 12G01 GN=zwf PE=3 SV=1	500	57411.7		56	18	38.6	13	12	14	7	2	7	13	5.33333	5.203e-07	4.236e-07	7.391e-07	2.176e-07	1.414e-08	2.476e-07	0.538462	0.166667	0.5	0.401709	0.204459	0.0400255
tr|Q1V7V3|Q1V7V3_VIBAL	Urocanate hydratase OS=Vibrio alginolyticus 12G01 GN=hutU PE=3 SV=1	586	64561.2		56	18	32.9	11	9	11	8	3	8	10.3333	6.33333	2.599e-07	2.983e-07	4.217e-07	1.579e-07	7.943e-08	1.958e-07	0.727273	0.333333	0.727273	0.59596	0.227441	0.126988
tr|Q1VEW2|Q1VEW2_VIBAL	Phosphoheptose isomerase OS=Vibrio alginolyticus 12G01 GN=gmhA PE=3 SV=1	191	20930.5		56	10	51.3	10	13	10	10	2	8	11	6.66667	1.174e-06	1.41e-06	2.253e-06	1.25e-06	7.048e-07	1.452e-06	1	0.153846	0.8	0.651282	0.442246	0.202806
tr|Q1V4P2|Q1V4P2_VIBAL	Putative periplasmic protein CpxP OS=Vibrio alginolyticus 12G01 GN=V12G01_15265 PE=4 SV=1	87	10389.2		56	7	69	6	9	8	7	7	9	7.66667	7.66667	5.885e-06	6.424e-06	1.311e-05	2.598e-06	4.561e-06	4.534e-06	1.16667	0.777778	1.125	1.02315	0.213516	0.0116599
tr|Q1VAN8|Q1VAN8_VIBAL	Uncharacterized protein OS=Vibrio alginolyticus 12G01 GN=V12G01_11213 PE=4 SV=1	625	70267.9		56	19	40	8	16	15	5	1	6	13	4	2.28e-07	4.448e-07	5.315e-07	2.471e-07	9.163e-09	2.047e-07	0.625	0.0625	0.4	0.3625	0.283119	0.0849989
tr|Q1V9I3|Q1V9I3_VIBAL	Uncharacterized protein OS=Vibrio alginolyticus 12G01 GN=V12G01_14254 PE=4 SV=1	212	24159.8		55	10	40.1	9	11	11	10	3	7	10.3333	6.66667	2.014e-06	1.926e-06	2.626e-06	1.074e-06	8.681e-07	8.549e-07	1.11111	0.272727	0.636364	0.673401	0.420417	0.0325654
tr|Q1VAX1|Q1VAX1_VIBAL	Glutathione reductase OS=Vibrio alginolyticus 12G01 GN=V12G01_10798 PE=3 SV=1	451	48897.6		55	13	36.8	7	12	11	9	1	7	10	5.66667	3.634e-07	4.01e-07	4.086e-07	2.484e-07	1.298e-08	1.871e-07	1.28571	0.0833333	0.636364	0.66847	0.601833	0.0860234
tr|Q1VDK4|Q1VDK4_VIBAL	50S ribosomal protein L20 OS=Vibrio alginolyticus 12G01 GN=rplT PE=3 SV=1	117	13393.6		54	10	43.6	8	11	9	7	9	9	9.33333	8.33333	4.843e-06	2.611e-06	2.872e-06	1.208e-06	3.455e-06	2.279e-06	0.875	0.818182	1	0.897727	0.0930154	0.126521
tr|Q1V4P4|Q1V4P4_VIBAL	ATP-dependent 6-phosphofructokinase OS=Vibrio alginolyticus 12G01 GN=pfkA PE=3 SV=1	320	34650.9		54	11	30.6	7	14	10	5	8	8	10.3333	7	5.683e-07	7.513e-07	1.141e-06	2.76e-07	5.159e-07	3.676e-07	0.714286	0.571429	0.8	0.695238	0.11547	0.0871498
tr|Q1VBB0|Q1VBB0_VIBAL	Putative acyl-CoA thiolase OS=Vibrio alginolyticus 12G01 GN=V12G01_01185 PE=3 SV=1	392	41937.3		54	7	28.1	1	4	3	2	0	2	2.66667	1.33333	1.597e-08	1.126e-07	2.249e-07	3.673e-08	0	8.704e-08	2	0	0.666667	0.888889	1.01835	0.143235
tr|Q1VCT6|Q1VCT6_VIBAL	Lecithin-dependent hemolysin (LDH) OS=Vibrio alginolyticus 12G01 GN=V12G01_03090 PE=4 SV=1	417	47293.9		53	13	42.4	13	14	8	4	2	9	11.6667	5	7.355e-07	5.711e-07	5.173e-07	2.405e-07	9.812e-08	4.998e-07	0.307692	0.142857	1.125	0.525183	0.525954	0.0985717
tr|Q1VCX3|Q1VCX3_VIBAL	Putative flagellar basal-body rod protein OS=Vibrio alginolyticus 12G01 GN=V12G01_02905 PE=4 SV=1	243	25826		53	7	37.9	10	13	9	7	5	7	10.6667	6.33333	2.388e-06	1.812e-06	1.779e-06	1.025e-06	8.52e-07	1.192e-06	0.7	0.384615	0.777778	0.620798	0.208204	0.0646716
tr|Q1VDF7|Q1VDF7_VIBAL	Glyceraldehyde-3-phosphate dehydrogenase OS=Vibrio alginolyticus 12G01 GN=V12G01_01985 PE=3 SV=1	477	52428.7		53	13	31	9	10	12	5	3	6	10.3333	4.66667	5.924e-07	3.429e-07	5.599e-07	1.531e-07	1.363e-07	5.006e-07	0.555556	0.3	0.5	0.451852	0.134409	0.149029
tr|Q1V595|Q1V595_VIBAL	Agmatinase OS=Vibrio alginolyticus 12G01 GN=V12G01_03417 PE=3 SV=1	306	33521.7		53	12	46.4	7	13	12	5	3	7	10.6667	5	5.218e-07	5.667e-07	8.365e-07	3.302e-07	5.197e-07	1.059e-06	0.714286	0.230769	0.583333	0.509463	0.250079	0.700374
tr|Q1VG49|Q1VG49_VIBAL	Uncharacterized protein OS=Vibrio alginolyticus 12G01 GN=V12G01_04481 PE=3 SV=1	678	75177.1		53	18	38.5	8	12	13	8	3	8	11	6.33333	1.85e-07	5.039e-07	4.845e-07	1.534e-07	7.806e-08	2.039e-07	1	0.25	0.615385	0.621795	0.375041	0.0814708
tr|Q1V8U6|Q1V8U6_VIBAL	Adenylate kinase OS=Vibrio alginolyticus 12G01 GN=adk PE=3 SV=1	214	23349.1		53	11	56.5	6	12	10	8	5	9	9.33333	7.33333	9.323e-07	1.094e-06	1.332e-06	6.004e-07	8.89e-07	1.035e-06	1.33333	0.416667	0.9	0.883333	0.458561	0.290338
tr|Q1V422|Q1V422_VIBAL	Agglutination protein OS=Vibrio alginolyticus 12G01 GN=V12G01_17932 PE=4 SV=1	423	47316.7		52	15	38.1	11.5	8.5	7	7.5	1	5	9	4.5	7.611e-07	3.866e-07	3.459e-07	2.096e-07	1.26e-08	3.083e-07	0.652174	0.117647	0.714286	0.494702	0.328013	0.0660319
tr|Q1VCP3|Q1VCP3_VIBAL	Fumarate hydratase, class I OS=Vibrio alginolyticus 12G01 GN=V12G01_16617 PE=4 SV=1	505	54805.7		51	13	33.1	12	7	8	6	4	12	9	7.33333	6.034e-07	2.532e-07	3.541e-07	1.635e-07	6.23e-08	4.409e-07	0.5	0.571429	1.5	0.857143	0.557875	0.174835
tr|Q1V8T3|Q1V8T3_VIBAL	Heat shock protein HslJ OS=Vibrio alginolyticus 12G01 GN=V12G01_19906 PE=4 SV=1	148	16604.2		51	5	56.8	6	9	9	7	4	8	8	6.33333	1.962e-06	2.78e-06	1.969e-06	1.921e-06	1.366e-06	1.75e-06	1.16667	0.444444	0.888889	0.833333	0.364302	0.229909
tr|Q1VB47|Q1VB47_VIBAL	Uncharacterized protein OS=Vibrio alginolyticus 12G01 GN=V12G01_01500 PE=4 SV=1	168	18591.4		51	9	58.9	9	10	10	7	6	8	9.66667	7	1.316e-06	8.467e-07	1.233e-06	6.941e-07	1.512e-06	1.476e-06	0.777778	0.6	0.8	0.725926	0.10962	0.593143
tr|Q1V6T9|Q1V6T9_VIBAL	LPS-assembly protein LptD OS=Vibrio alginolyticus 12G01 GN=lptD PE=3 SV=1	781	89457.1		50	15	22.9	8	11	9	9	2	6	9.33333	5.66667	1.127e-07	1.209e-07	1.647e-07	1.1e-07	2.861e-08	6.527e-08	1.125	0.181818	0.666667	0.657828	0.471653	0.228387
tr|Q1V381|Q1V381_VIBAL	50S ribosomal protein L14 OS=Vibrio alginolyticus 12G01 GN=rplN PE=3 SV=1	123	13596.4		50	7	42.3	4	4	3	4	6	5	3.66667	5	8.79e-07	5.499e-07	8.716e-07	7.404e-07	2.778e-06	1.116e-06	1	1.5	1.66667	1.38889	0.346944	0.062712
tr|Q1V3A4|Q1V3A4_VIBAL	UDP-sugar hydrolase OS=Vibrio alginolyticus 12G01 GN=ushA PE=3 SV=1	560	62329		50	14	27.9	5.5	9.5	6	7	2	4	7	4.33333	4.095e-07	5.597e-07	8.981e-07	6.236e-07	6.902e-07	6.022e-07	1.27273	0.210526	0.666667	0.71664	0.532861	0.697632
tr|Q1V8C7|Q1V8C7_VIBAL	Long-chain fatty acid transport protein OS=Vibrio alginolyticus 12G01 GN=V12G01_08640 PE=4 SV=1	411	44939.6		50	8	24.8	8	11	11	9	3	4	10	5.33333	1.055e-06	7.882e-07	5.906e-07	5.565e-07	3.133e-07	2.782e-07	1.125	0.272727	0.363636	0.587121	0.468029	0.0871243
tr|Q1V535|Q1V535_VIBAL	Translation initiation factor IF-1 OS=Vibrio alginolyticus 12G01 GN=infA PE=3 SV=1	72	8235.3		50	3	77.8	6	5	6	6	4	8	5.66667	6	1.413e-06	1.045e-06	2.42e-06	2.084e-06	3.688e-06	3.63e-06	1	0.8	1.33333	1.04444	0.26943	0.0425165
tr|Q1VB60|Q1VB60_VIBAL	Uncharacterized protein OS=Vibrio alginolyticus 12G01 GN=V12G01_01435 PE=4 SV=1	718	82956.8		50	20	37.6	0	0	0	18	9	18	0	15	0	0	0	3.977e-07	4.68e-07	7.205e-07						0.00368969
tr|Q1VAI5|Q1VAI5_VIBAL	Aminoacyl-histidine dipeptidase OS=Vibrio alginolyticus 12G01 GN=V12G01_12655 PE=4 SV=1	490	53807		50	12	25.3	8	12	8	8	3	8	9.33333	6.33333	4.458e-07	3.149e-07	4.775e-07	2.986e-07	1.702e-07	2.95e-07	1	0.25	1	0.75	0.433013	0.222436
tr|Q1VBP2|Q1VBP2_VIBAL	Predicted ATP-dependent endonuclease of the OLD family protein OS=Vibrio alginolyticus 12G01 GN=V12G01_07818 PE=4 SV=1	608	68529.2		49	18	38	8	9	7	9	1	6	8	5.33333	1.733e-07	2.066e-07	1.219e-07	1.406e-07	6.877e-09	2.135e-07	1.125	0.111111	0.857143	0.697751	0.525402	0.407766
tr|Q1V6I2|Q1V6I2_VIBAL	30S ribosomal protein S6 OS=Vibrio alginolyticus 12G01 GN=rpsF PE=3 SV=1	129	15009.6		49	8	42.6	7	8	8	4	7	9	7.66667	6.66667	1.38e-06	1.735e-06	2.199e-06	8.358e-07	4.973e-06	2.097e-06	0.571429	0.875	1.125	0.857143	0.277217	0.140455
tr|Q1VBE6|Q1VBE6_VIBAL	Ribose ABC transporter, periplasmic D-ribose-binding protein OS=Vibrio alginolyticus 12G01 GN=V12G01_01005 PE=4 SV=1	292	30727		48	9	46.6	11	9	8	7	5	6	9.33333	6	1.294e-06	4.994e-07	4.028e-07	5.739e-07	3.631e-06	4.327e-07	0.636364	0.555556	0.75	0.647306	0.097683	0.0540064
tr|Q1V541|Q1V541_VIBAL	DNA topoisomerase 1 OS=Vibrio alginolyticus 12G01 GN=topA PE=3 SV=1	876	98164.8		48	22	35.8	6	8	13	5	1	3	9	3	1.739e-07	1.556e-07	2.799e-07	6.996e-08	4.244e-08	4.485e-08	0.833333	0.125	0.230769	0.396368	0.382101	0.0716982
tr|Q1V5R5|Q1V5R5_VIBAL	Uncharacterized protein OS=Vibrio alginolyticus 12G01 GN=V12G01_00522 PE=4 SV=1	994	107642		48	17	21.1	12	12	8	3	0	3	10.6667	2	1.779e-07	2.192e-07	9.568e-08	3.134e-08	0	6.347e-08	0.25	0	0.375	0.208333	0.190941	0.0593199
tr|Q1V305|Q1V305_VIBAL	Phosphoglucosamine mutase OS=Vibrio alginolyticus 12G01 GN=glmM PE=3 SV=1	446	47894.8		48	15	37.9	7	10	8	8	2	6	8.33333	5.33333	2.889e-07	3.305e-07	3.586e-07	2.258e-07	6.079e-08	1.899e-07	1.14286	0.2	0.75	0.697619	0.473606	0.151779
tr|Q1VC07|Q1VC07_VIBAL	Hypothetical Acyl-CoA synthetase OS=Vibrio alginolyticus 12G01 GN=V12G01_17797 PE=4 SV=1	114	12969.6		47	7	44.7	9	11	8	7	4	4	9.33333	5	2.943e-06	4.047e-06	3.431e-06	2.519e-06	1.63e-06	1.5e-06	0.777778	0.363636	0.5	0.547138	0.211056	0.0521318
tr|Q1VF19|Q1VF19_VIBAL	Uncharacterized protein OS=Vibrio alginolyticus 12G01 GN=V12G01_22328 PE=4 SV=1	222	23731.2		47	11	43.2	10	9	11	3	2	8	10	4.33333	1.916e-06	1.116e-06	1.427e-06	1.948e-07	1.32e-07	7.687e-07	0.3	0.222222	0.727273	0.416498	0.271934	0.0121445
tr|Q1VBS0|Q1VBS0_VIBAL	Alanine racemase OS=Vibrio alginolyticus 12G01 GN=alr PE=1 SV=1	409	43984.6		46	10	34.7	11	10	10	5	3	4	10.3333	4	3.045e-07	2.387e-07	5.199e-07	7.738e-08	1.057e-07	1.087e-07	0.454545	0.3	0.4	0.384848	0.0783789	0.0539851
tr|Q1VDA8|Q1VDA8_VIBAL	Putative glutathione S-transferase OS=Vibrio alginolyticus 12G01 GN=V12G01_02230 PE=4 SV=1	285	32357.1		46	11	32.3	6.5	10.5	10.5	8.5	0.5	3	9.16667	4	4.322e-07	4.713e-07	7.675e-07	3.651e-07	5.467e-08	1.748e-07	1.30769	0.047619	0.285714	0.547009	0.669442	0.0610372
tr|Q1VF42|Q1VF42_VIBAL	Peptidyl-prolyl cis-trans isomerase OS=Vibrio alginolyticus 12G01 GN=V12G01_22213 PE=3 SV=1	181	19916.1		46	9	44.8	9	8	8	10	1	3	8.33333	4.66667	5.501e-07	1.181e-06	1.75e-06	1.055e-06	5.138e-07	2.27e-07	1.11111	0.125	0.375	0.537037	0.512636	0.0910521
tr|Q1VAI2|Q1VAI2_VIBAL	TonB-dependent heme receptor OS=Vibrio alginolyticus 12G01 GN=V12G01_12670 PE=4 SV=1	728	82442.2		46	16	29.3	9	10	12	6	0	3	10.3333	3	4.717e-07	1.658e-07	2.822e-07	7.346e-08	0	1.115e-07	0.666667	0	0.25	0.305556	0.336788	0.0395792
tr|Q1VFZ6|Q1VFZ6_VIBAL	4-alpha-glucanotransferase OS=Vibrio alginolyticus 12G01 GN=V12G01_04746 PE=4 SV=1	726	81980.5		46	21	33.5	9	10	8	5	2	6	9	4.33333	3.008e-07	2.417e-07	2.482e-07	1.047e-07	3.753e-08	1.64e-07	0.555556	0.2	0.75	0.501852	0.278905	0.111575
tr|Q1V6B9|Q1V6B9_VIBAL	Methionine--tRNA ligase OS=Vibrio alginolyticus 12G01 GN=metG PE=3 SV=1	679	77106.1		46	20	32.4	10	12	7	3	2	3	9.66667	2.66667	5.002e-07	3.161e-07	2.756e-07	4.106e-08	3.29e-08	8.066e-08	0.3	0.166667	0.428571	0.298413	0.13096	0.0227163
tr|Q1V6D3|Q1V6D3_VIBAL	Phosphate acetyltransferase OS=Vibrio alginolyticus 12G01 GN=V12G01_23665 PE=3 SV=1	714	76797.5		46	13	22.4	9	6	6	5	6	7	7	6	3.571e-07	1.968e-07	1.228e-07	8.958e-08	3.716e-07	1.762e-07	0.555556	1	1.16667	0.907407	0.315902	0.65095
tr|Q1V5B9|Q1V5B9_VIBAL	Gamma-glutamyltranspeptidase OS=Vibrio alginolyticus 12G01 GN=V12G01_09903 PE=4 SV=1	588	63838.6		46	16	35.4	6	14	8	6	1	4	9.33333	3.66667	2.001e-07	2.132e-07	3.032e-07	7.502e-08	2.121e-08	9.75e-08	1	0.0714286	0.5	0.52381	0.464743	0.0687311
tr|Q1VB59|Q1VB59_VIBAL	Uncharacterized protein OS=Vibrio alginolyticus 12G01 GN=V12G01_01440 PE=4 SV=1	485	52163.9		46	17	37.9	1	0	0	16	11	15	0.333333	14	6.389e-09	0	0	5.461e-07	7.629e-07	8.341e-07	16			16		0.00300106
tr|Q1V4F9|Q1V4F9_VIBAL	Penicillin-binding protein activator LpoA OS=Vibrio alginolyticus 12G01 GN=lpoA PE=1 SV=1	603	67900.5		45	15	28.5	12	12	6	3	1	6	10	3.33333	2.794e-07	4.112e-07	1.832e-07	4.197e-08	2.446e-08	1.355e-07	0.25	0.0833333	1	0.444444	0.488289	0.0480935
tr|Q1VEY5|Q1VEY5_VIBAL	3-hydroxyacyl-[acyl-carrier-protein] dehydratase FabZ OS=Vibrio alginolyticus 12G01 GN=fabZ PE=3 SV=1	150	16903.8		45	7	44.7	9	8	9	7	2	7	8.66667	5.33333	1.545e-06	8.026e-07	1.085e-06	3.169e-07	1.894e-07	8.327e-07	0.777778	0.25	0.777778	0.601852	0.304713	0.0422529
tr|Q1V509|Q1V509_VIBAL	Deoxyribose-phosphate aldolase OS=Vibrio alginolyticus 12G01 GN=deoC PE=3 SV=1	258	27813.2		45	11	55.8	10	11	10	4	0	8	10.3333	4	1.07e-06	8.47e-07	9.51e-07	3.73e-07	0	8.636e-07	0.4	0	0.8	0.4	0.4	0.0647906
tr|Q1V532|Q1V532_VIBAL	Transcription elongation factor NusA OS=Vibrio alginolyticus 12G01 GN=V12G01_21803 PE=3 SV=1	495	55053.2		45	12	25.1	8	8	4	4	4	6	6.66667	4.66667	3.208e-07	3.529e-07	2.091e-07	1.077e-07	1.796e-07	2.156e-07	0.5	0.5	1.5	0.833333	0.57735	0.21254
tr|Q1V5B0|Q1V5B0_VIBAL	Aminopeptidase P OS=Vibrio alginolyticus 12G01 GN=V12G01_09948 PE=4 SV=1	596	65684.2		45	17	33.7	10	9	8	5	4	4	9	4.33333	3.338e-07	2.216e-07	2.566e-07	8.707e-08	1.063e-07	1.36e-07	0.5	0.444444	0.5	0.481481	0.032075	0.118295
tr|Q1VCS7|Q1VCS7_VIBAL	Uncharacterized protein OS=Vibrio alginolyticus 12G01 GN=V12G01_03135 PE=4 SV=1	144	15624.2		44	10	60.4	7	8	8	8	2	7	7.66667	5.66667	1.054e-06	1.075e-06	2.266e-06	9.822e-07	2.052e-07	1.052e-06	1.14286	0.25	0.875	0.755952	0.458179	0.0739086
tr|Q1VCX1|Q1VCX1_VIBAL	Flagellar basal-body rod modification protein D OS=Vibrio alginolyticus 12G01 GN=flgD PE=4 SV=1	227	24210		44	8	41	8	11	11	6	4	4	10	4.66667	1.081e-06	1e-06	1.211e-06	6.757e-07	1.254e-06	4.856e-07	0.75	0.363636	0.363636	0.492424	0.223067	0.263702
tr|Q1VED6|Q1VED6_VIBAL	Aspartate-semialdehyde dehydrogenase OS=Vibrio alginolyticus 12G01 GN=asd PE=3 SV=1	371	40288.5		44	13	46.1	5	7	11	9	2	5	7.66667	5.33333	5.146e-07	5.724e-07	1.261e-06	3.219e-07	1.483e-07	3.655e-07	1.8	0.285714	0.454545	0.846753	0.829841	0.0469671
tr|Q1V4S3|Q1V4S3_VIBAL	Protease DO OS=Vibrio alginolyticus 12G01 GN=V12G01_12435 PE=1 SV=1	250	26647.1		44	6	27.2	12	8	7	6	4	6	9	5.33333	1.336e-06	7.014e-07	1.019e-06	4.443e-07	7.911e-07	5.247e-07	0.5	0.5	0.857143	0.619048	0.206197	0.132077
tr|Q1V5D0|Q1V5D0_VIBAL	Transcription termination factor Rho OS=Vibrio alginolyticus 12G01 GN=rho PE=3 SV=1	419	46896.6		44	16	36	7	2	3	0	18	9	4	9	2.503e-07	1.099e-07	1.14e-07	0	2.765e-06	4.828e-07	0	9	3	4	4.58258	0.00654198
tr|Q1VBR3|Q1VBR3_VIBAL	Uncharacterized protein OS=Vibrio alginolyticus 12G01 GN=V12G01_07713 PE=4 SV=1	580	66250.2		43	10	25	9	10	9	3	3	7	9.33333	4.33333	3.142e-07	2.431e-07	3.694e-07	6.509e-08	1.104e-07	6.185e-07	0.333333	0.3	0.777778	0.47037	0.266744	0.536319
tr|Q1V8N8|Q1V8N8_VIBAL	Cysteine--tRNA ligase OS=Vibrio alginolyticus 12G01 GN=cysS PE=3 SV=1	460	52123.6		43	15	36.3	8	10	8	5	1	6	8.66667	4	3.853e-07	3.617e-07	3.991e-07	1.326e-07	2.72e-08	1.872e-07	0.625	0.1	0.75	0.491667	0.344903	0.0591753
tr|Q1VAJ6|Q1VAJ6_VIBAL	6,7-dimethyl-8-ribityllumazine synthase OS=Vibrio alginolyticus 12G01 GN=ribH PE=3 SV=1	156	16457.6		43	7	50.6	9	9	6	5	4	9	8	6	1.747e-06	1.018e-06	1.101e-06	5.674e-07	5.317e-07	1.8e-06	0.555556	0.444444	1.5	0.833333	0.580017	0.271141
tr|Q1V692|Q1V692_VIBAL	N-succinylglutamate 5-semialdehyde dehydrogenase OS=Vibrio alginolyticus 12G01 GN=astD PE=3 SV=1	485	52008.5		43	13	32.4	9	9	5	7	2	8	7.66667	5.66667	3.908e-07	3.892e-07	2.608e-07	1.913e-07	4.961e-08	3.157e-07	0.777778	0.222222	1.6	0.866667	0.693177	0.173994
tr|Q1V3A9|Q1V3A9_VIBAL	Peptide chain release factor 1 OS=Vibrio alginolyticus 12G01 GN=prfA PE=3 SV=1	362	40449.1		42	13	31.5	10	8	7	6	3	8	8.33333	5.66667	2.769e-07	1.416e-07	2.015e-07	8.865e-08	1.409e-07	2.905e-07	0.6	0.375	1.14286	0.705952	0.394741	0.532752
tr|Q1V7V9|Q1V7V9_VIBAL	Threonyl-tRNA synthetase (Fragment) OS=Vibrio alginolyticus 12G01 GN=V12G01_19546 PE=3 SV=1	410	47312.3		42	12	24.1	9	10	9	4	2	4	9.33333	3.33333	3.135e-07	2.595e-07	3.615e-07	7.578e-08	1.692e-08	1.685e-07	0.444444	0.2	0.444444	0.362963	0.14113	0.060017
tr|Q1V8N7|Q1V8N7_VIBAL	Peptidyl-prolyl cis-trans isomerase OS=Vibrio alginolyticus 12G01 GN=V12G01_20136 PE=3 SV=1	164	18190.8		42	8	81.1	5	6	5	6	2	6	5.33333	4.66667	1.027e-06	1.12e-06	1.052e-06	5.527e-07	2.12e-07	1.088e-06	1.2	0.333333	1.2	0.911111	0.50037	0.132349
tr|Q1V4B4|Q1V4B4_VIBAL	3-oxoacyl-[acyl-carrier-protein] synthase 2 OS=Vibrio alginolyticus 12G01 GN=V12G01_00704 PE=3 SV=1	416	43507.8		42	11	41.3	8	6	7	6	3	6	7	5	7.267e-07	5.493e-07	4.286e-07	5.632e-07	4.897e-07	3.085e-07	0.75	0.5	0.857143	0.702381	0.183271	0.412234
tr|Q1V5W4|Q1V5W4_VIBAL	ClpB protein OS=Vibrio alginolyticus 12G01 GN=V12G01_13199 PE=3 SV=1	857	96104.1		42	24	26.1	13	5	3	2	10	3	7	5	3.32e-07	4.55e-08	2.054e-08	8.342e-09	5.367e-07	6.104e-08	0.153846	2	1	1.05128	0.924145	0.329649
tr|Q1V6D2|Q1V6D2_VIBAL	Acetate kinase OS=Vibrio alginolyticus 12G01 GN=ackA PE=3 SV=1	398	43152.8		42	11	45.2	13	9	5	4	1	6	9	3.66667	1.101e-06	3.819e-07	3.619e-07	1.501e-07	2.651e-08	2.597e-07	0.307692	0.111111	1.2	0.539601	0.580307	0.0266057
tr|Q1VCY8|Q1VCY8_VIBAL	60 kDa chaperonin OS=Vibrio alginolyticus 12G01 GN=groL PE=3 SV=1	532	56479.3		41	17	36.1	10	6	7	3	2	4	7.66667	3	2.047e-07	3.5e-07	4.491e-07	1.878e-07	1.509e-07	1.955e-07	0.3	0.333333	0.571429	0.401587	0.148028	0.175022
tr|Q1V3K8|Q1V3K8_VIBAL	LPS-assembly lipoprotein LptE OS=Vibrio alginolyticus 12G01 GN=lptE PE=1 SV=1	179	20397.4		41	10	60.9	6	9	7	5	4	6	7.33333	5	6.513e-07	1.102e-06	1.038e-06	3.163e-07	4.419e-07	7.053e-07	0.833333	0.444444	0.857143	0.71164	0.231704	0.107685
tr|Q1VED3|Q1VED3_VIBAL	3-hydroxydecanoyl-ACP dehydratase (Fragment) OS=Vibrio alginolyticus 12G01 GN=V12G01_18122 PE=3 SV=1	171	18898.6		41	6	27.5	5	6	9	5	4	4	6.66667	4.33333	1.059e-06	7.215e-07	1.996e-06	7.527e-07	1.28e-06	8.955e-07	1	0.666667	0.444444	0.703704	0.279623	0.308684
tr|Q1VET6|Q1VET6_VIBAL	Flagellin OS=Vibrio alginolyticus 12G01 GN=V12G01_22743 PE=4 SV=1	379	41082.5		41	16	47.8	5	4	4	7.5	2	6	4.33333	5.16667	4.964e-07	4.124e-07	8.34e-07	2.863e-07	1.925e-07	4.114e-07	1.5	0.5	1.5	1.16667	0.57735	0.128676
tr|Q1V4R4|Q1V4R4_VIBAL	Export protein SecB OS=Vibrio alginolyticus 12G01 GN=V12G01_15155 PE=3 SV=1	118	13203.5		41	7	52.5	6	9	9	6	2	7	8	5	1.62e-06	2.649e-06	2.51e-06	1.067e-06	4.059e-07	2.314e-06	1	0.222222	0.777778	0.666667	0.400617	0.0769394
tr|Q1VAC6|Q1VAC6_VIBAL	Outer membrane protein assembly factor BamB OS=Vibrio alginolyticus 12G01 GN=bamB PE=1 SV=1	386	41496.4		41	10	34.2	6	13	8	7	1	6	9	4.66667	5.115e-07	5.886e-07	7.132e-07	4.239e-07	2.726e-08	5.353e-07	1.16667	0.0769231	0.75	0.66453	0.549876	0.145828
tr|Q1V369|Q1V369_VIBAL	30S ribosomal protein S13 (Fragment) OS=Vibrio alginolyticus 12G01 GN=V12G01_11868 PE=3 SV=1	71	7746.19		40	6	85.9	8	9	6	6	6	5	7.66667	5.66667	4.617e-06	4.255e-06	7.629e-06	3.229e-06	4.232e-06	4.317e-06	0.75	0.666667	0.833333	0.75	0.0833333	0.129887
tr|Q1VCW7|Q1VCW7_VIBAL	LfgM OS=Vibrio alginolyticus 12G01 GN=V12G01_02935 PE=4 SV=1	93	10214.3		40	5	67.7	5	10	7	5	3	3	7.33333	3.66667	1.805e-06	3.128e-06	2.251e-06	8.201e-07	1.595e-06	7.27e-07	1	0.3	0.428571	0.57619	0.372617	0.0331732
tr|Q1V8D8|Q1V8D8_VIBAL	Putative oxidoreductase iron/ascorbate family protein OS=Vibrio alginolyticus 12G01 GN=V12G01_08585 PE=3 SV=1	279	31775		40	8	43	8	9	7	6	2	4	8	4	4.853e-07	6.929e-07	7.783e-07	3.267e-07	5.863e-07	6.214e-07	0.75	0.222222	0.571429	0.51455	0.268447	0.379885
tr|Q1VAA5|Q1VAA5_VIBAL	Queuine tRNA-ribosyltransferase OS=Vibrio alginolyticus 12G01 GN=tgt PE=3 SV=1	378	43266.5		40	14	33.9	6	7	11	3	3	2	8	2.66667	1.837e-07	2.834e-07	7.336e-07	4.286e-08	2.036e-07	7.096e-08	0.5	0.428571	0.181818	0.37013	0.166948	0.0456111
tr|Q1VAJ5|Q1VAJ5_VIBAL	3,4-dihydroxy-2-butanone 4-phosphate synthase OS=Vibrio alginolyticus 12G01 GN=ribB PE=3 SV=1	369	40399.5		40	9	32	10	10	9	4	1	4	9.66667	3	3.808e-07	4.777e-07	3.121e-07	2.46e-07	5.254e-08	3.387e-07	0.4	0.1	0.444444	0.314815	0.187358	0.172701
tr|Q1VG15|Q1VG15_VIBAL	Putative maltose operon periplasmic protein OS=Vibrio alginolyticus 12G01 GN=V12G01_04651 PE=4 SV=1	269	29166		40	8	29.4	7	8	8	5	2	7	7.66667	4.66667	6.534e-07	6.28e-07	7.799e-07	3.415e-07	1.365e-07	4.525e-07	0.714286	0.25	0.875	0.613095	0.324555	0.0877322
tr|Q1VAT3|Q1VAT3_VIBAL	Delta-aminolevulinic acid dehydratase OS=Vibrio alginolyticus 12G01 GN=V12G01_10988 PE=3 SV=1	354	39439.7		40	10	38.4	7	8	9	2	3	8	8	4.33333	6.339e-07	6.283e-07	1.03e-06	6.092e-08	3.001e-07	5.778e-07	0.285714	0.375	0.888889	0.516534	0.325544	0.0664867
tr|Q1VB20|Q1VB20_VIBAL	Choloylglycine hydrolase OS=Vibrio alginolyticus 12G01 GN=V12G01_01635 PE=4 SV=1	429	48928.5		40	11	27.5	8	7	8	5	2	8	7.66667	5	3.748e-07	3.797e-07	7.784e-07	1.173e-07	1.231e-07	3.863e-07	0.625	0.285714	1	0.636905	0.357292	0.084051
tr|Q1V775|Q1V775_VIBAL	Aerobic respiration control protein FexA OS=Vibrio alginolyticus 12G01 GN=V12G01_13554 PE=4 SV=1	238	27043.9		39	11	49.2	11	10	4	2	5	2	8.33333	3	9.199e-07	3.621e-07	1.325e-07	4.089e-08	1.07e-06	1.717e-08	0.181818	0.5	0.5	0.393939	0.183702	0.424055
tr|Q1VB28|Q1VB28_VIBAL	Fibronectin type III domain protein OS=Vibrio alginolyticus 12G01 GN=V12G01_01595 PE=4 SV=1	3210	334373		39	12	5.1	8	7	8	9	2	5	7.66667	5.33333	4.289e-08	3.2e-08	3.735e-08	3.477e-08	2.381e-08	1.989e-08	1.125	0.285714	0.625	0.678571	0.4222	0.493403
tr|Q1V4W7|Q1V4W7_VIBAL	Glycine--tRNA ligase beta subunit OS=Vibrio alginolyticus 12G01 GN=glyS PE=3 SV=1	688	76305.5		39	16	28.2	12	6	10	2	0	4	9.33333	2	2.351e-07	7.526e-08	1.652e-07	1.238e-08	0	5.39e-08	0.166667	0	0.4	0.188889	0.200924	0.0447269
tr|Q1V6Q6|Q1V6Q6_VIBAL	RNA polymerase sigma factor RpoD OS=Vibrio alginolyticus 12G01 GN=rpoD PE=3 SV=1	574	65548.1		38	17	25.4	9	4	3	1	7	6	5.33333	4.66667	3.979e-07	7.559e-08	3.479e-08	1.397e-08	3.037e-07	1.409e-07	0.111111	1.75	2	1.28704	1.02602	0.61464
tr|Q1V344|Q1V344_VIBAL	Alcohol dehydrogenase/acetaldehyde dehydrogenase OS=Vibrio alginolyticus 12G01 GN=V12G01_23510 PE=4 SV=1	900	97285.8		38	14	17.4	8	6	8	2	6	6	7.33333	4.66667	1.429e-07	8.748e-08	1.365e-07	2.704e-08	1.756e-07	1.04e-07	0.25	1	0.75	0.666667	0.381881	0.553216
tr|Q1V7M5|Q1V7M5_VIBAL	ADP-L-glycero-D-manno-heptose-6-epimerase OS=Vibrio alginolyticus 12G01 GN=hldD PE=3 SV=1	313	35208.1		38	10	35.8	9	9	8	4	1	5	8.66667	3.33333	5.261e-07	4.669e-07	5.75e-07	2.199e-07	2.471e-07	2.414e-07	0.444444	0.111111	0.625	0.393519	0.260702	0.103634
tr|Q1VEQ0|Q1VEQ0_VIBAL	Chemotaxis protein CheW OS=Vibrio alginolyticus 12G01 GN=V12G01_22923 PE=4 SV=1	164	18412.4		38	8	45.7	9	7	7	5	4	6	7.66667	5	1.648e-06	1.257e-06	1.841e-06	6.571e-07	6.669e-07	8.493e-07	0.555556	0.571429	0.857143	0.661376	0.169725	0.0525186
tr|Q1V4I1|Q1V4I1_VIBAL	Immunogenic protein OS=Vibrio alginolyticus 12G01 GN=V12G01_03315 PE=4 SV=1	336	36152.6		38	11	39	5	9	8	7	3	4	7.33333	4.66667	4.7e-07	9.512e-07	7.6e-07	7.266e-07	2.775e-07	4.654e-07	1.4	0.333333	0.5	0.744444	0.573811	0.232582
tr|Q1VAT1|Q1VAT1_VIBAL	DNA polymerase I OS=Vibrio alginolyticus 12G01 GN=V12G01_10998 PE=3 SV=1	928	103169		38	15	19.7	7	8	11	4	2	5	8.66667	3.66667	8.667e-08	8.009e-08	1.084e-07	2.032e-08	2.776e-08	4.525e-08	0.571429	0.25	0.454545	0.425325	0.162694	0.153717
tr|Q1VGD0|Q1VGD0_VIBAL	Putative amino acid ABC transporter, periplasmic amino acid-binding portion OS=Vibrio alginolyticus 12G01 GN=V12G01_04076 PE=4 SV=1	251	28963.7		38	7	37.1	7	7	8	6	4	6	7.33333	5.33333	4.122e-07	2.861e-07	6.128e-07	4.092e-07	2.443e-07	4.004e-07	0.857143	0.571429	0.75	0.72619	0.144338	0.439116
tr|Q1V6H6|Q1V6H6_VIBAL	Shikimate kinase OS=Vibrio alginolyticus 12G01 GN=aroK PE=3 SV=1	172	19496		38	7	39.5	9	9	7	4	2	3	8.33333	3	1.35e-06	1.226e-06	7.367e-07	3.057e-07	4.275e-07	3.892e-07	0.444444	0.222222	0.428571	0.365079	0.123972	0.0321785
tr|Q1V6P1|Q1V6P1_VIBAL	Ribonucleotide-diphosphate reductase beta subunit OS=Vibrio alginolyticus 12G01 GN=V12G01_16357 PE=4 SV=1	377	43777.9		38	12	33.4	12	7	7	8	1	3	8.66667	4	4.438e-07	3.324e-07	4.568e-07	4.282e-07	4.08e-07	7.859e-08	0.666667	0.142857	0.428571	0.412698	0.262265	0.358687
tr|Q1V391|Q1V391_VIBAL	Cell division protein FtsH (Fragment) OS=Vibrio alginolyticus 12G01 GN=V12G01_21773 PE=3 SV=1	569	62660.1		37	17	28.8	5	5	5	3	4	3	5	3.33333	9.736e-08	4.693e-08	1.621e-07	1.981e-08	9.996e-08	5.078e-08	0.6	0.8	0.6	0.666667	0.11547	0.285781
tr|Q1V8X9|Q1V8X9_VIBAL	Phosphocarrier protein HPr OS=Vibrio alginolyticus 12G01 GN=V12G01_15510 PE=3 SV=1	85	9135.74		37	4	81.2	3	7	5	2	2	2	5	2	2.15e-06	1.614e-06	1.434e-06	9.984e-07	1.835e-06	1.384e-06	0.666667	0.285714	0.4	0.450794	0.19549	0.344969
tr|Q1V472|Q1V472_VIBAL	Inorganic pyrophosphatase OS=Vibrio alginolyticus 12G01 GN=ppa PE=3 SV=1	176	19705.9		37	7	36.4	5	6	5	4	4	5	5.33333	4.33333	2.679e-07	6.824e-07	5.115e-07	1.38e-07	6.069e-07	5.317e-07	0.8	0.666667	1	0.822222	0.167774	0.536026
tr|Q1VEY0|Q1VEY0_VIBAL	Acetyl-coenzyme A carboxylase carboxyl transferase subunit alpha OS=Vibrio alginolyticus 12G01 GN=accA PE=3 SV=1	319	35659.1		37	8	29.5	7	8	4	3	2	6	6.33333	3.66667	4.357e-07	1.149e-06	2.576e-07	4.545e-07	9.985e-08	9.186e-07	0.428571	0.25	1.5	0.72619	0.676061	0.408162
tr|Q1V9W5|Q1V9W5_VIBAL	Lipoprotein-related protein OS=Vibrio alginolyticus 12G01 GN=V12G01_21328 PE=4 SV=1	144	15859.3		37	5	46.5	7	6	5	6	1	7	6	4.66667	1.207e-06	1.257e-06	1.249e-06	1.585e-06	1.865e-07	1.065e-06	0.857143	0.166667	1.4	0.807937	0.618137	0.296965
tr|Q1V324|Q1V324_VIBAL	50S ribosomal protein L3 OS=Vibrio alginolyticus 12G01 GN=rplC PE=3 SV=1	209	22429.8		36	9	42.1	6	5	5	6	4	5	5.33333	5	8.489e-07	4.961e-07	4.621e-07	3.11e-07	6.085e-07	5.015e-07	1	0.8	1	0.933333	0.11547	0.391345
tr|Q1V8J4|Q1V8J4_VIBAL	Uncharacterized protein OS=Vibrio alginolyticus 12G01 GN=V12G01_08305 PE=4 SV=1	204	22579.1		36	4	26	6	8	6	6	0	4	6.66667	3.33333	1.318e-06	9.08e-07	8.68e-07	9.661e-07	0	6.434e-07	1	0	0.666667	0.555556	0.509175	0.0993199
tr|Q1VDY1|Q1VDY1_VIBAL	Nonspecific acid phosphatase OS=Vibrio alginolyticus 12G01 GN=V12G01_18882 PE=4 SV=1	332	37437.7		36	8	32.2	8	5	7	5	1	5	6.66667	3.66667	5.341e-07	2.411e-07	5.562e-07	1.962e-07	6.355e-08	2.567e-07	0.625	0.2	0.714286	0.513095	0.274799	0.0823039
tr|Q1V8Q3|Q1V8Q3_VIBAL	Putative manganese-dependent inorganic pyrophosphatase OS=Vibrio alginolyticus 12G01 GN=V12G01_20056 PE=4 SV=1	301	33041.8		36	11	39.2	8	4	8	5	1	5	6.66667	3.66667	7.436e-07	4.102e-07	5.984e-07	2.916e-07	1.349e-07	6.058e-07	0.625	0.25	0.625	0.5	0.216506	0.175715
tr|Q1VAD9|Q1VAD9_VIBAL	Homocysteine synthase OS=Vibrio alginolyticus 12G01 GN=V12G01_12885 PE=3 SV=1	422	45959.3		36	13	29.4	8	6	8	3	2	3	7.33333	2.66667	1.453e-07	1.734e-07	2.877e-07	4.754e-08	9.099e-07	6.937e-08	0.375	0.333333	0.375	0.361111	0.0240563	0.219061
tr|Q1V301|Q1V301_VIBAL	Ribose-5-phosphate isomerase A OS=Vibrio alginolyticus 12G01 GN=rpiA PE=3 SV=1	218	23170.9		35	8	50.5	4	6	7	3	4	7	5.66667	4.66667	2.948e-07	4.661e-07	1.327e-06	1.533e-07	6.378e-07	1.192e-06	0.75	0.666667	1	0.805556	0.173472	0.636434
tr|Q1V798|Q1V798_VIBAL	Peptide chain release factor 2 OS=Vibrio alginolyticus 12G01 GN=V12G01_13439 PE=3 SV=1	289	32645.2		35	12	37	8	7	4	6	3	5	6.33333	4.66667	5.347e-07	2.58e-07	1.734e-07	2.88e-07	1.413e-07	5.9e-07	0.75	0.428571	1.25	0.809524	0.413937	0.671243
tr|Q1V374|Q1V374_VIBAL	30S ribosomal protein S5 OS=Vibrio alginolyticus 12G01 GN=rpsE PE=3 SV=1	167	17608.3		35	9	59.3	6	7	4	3	5	6	5.66667	4.66667	9.483e-07	6.971e-07	7.372e-07	3.375e-07	6.996e-07	1.173e-06	0.5	0.714286	1.5	0.904762	0.526508	0.60145
tr|Q1V3Q7|Q1V3Q7_VIBAL	Glutamate--cysteine ligase OS=Vibrio alginolyticus 12G01 GN=gshA PE=3 SV=1	522	59547.3		35	9	23.9	5	7	9	4	2	4	7	3.33333	1.799e-07	1.364e-07	2.96e-07	1.301e-07	6.562e-08	1.876e-07	0.8	0.285714	0.444444	0.510053	0.263345	0.289696
tr|Q1VFI6|Q1VFI6_VIBAL	Uncharacterized protein OS=Vibrio alginolyticus 12G01 GN=V12G01_05546 PE=4 SV=1	483	51557.2		35	12	30.4	9	8	9	4	0	0	8.66667	1.33333	2.597e-07	2.318e-07	7.266e-07	1.094e-07	0	0	0.444444	0	0	0.148148	0.2566	0.013254
tr|Q1VAM9|Q1VAM9_VIBAL	DNA-directed RNA polymerase subunit omega OS=Vibrio alginolyticus 12G01 GN=rpoZ PE=3 SV=1	90	10034.3		35	7	72.2	7	8	3	4	3	5	6	4	3.224e-06	3.956e-06	6.804e-07	9.967e-07	8.034e-07	2.492e-06	0.571429	0.375	1.66667	0.871032	0.696004	0.0659044
tr|Q1VB27|Q1VB27_VIBAL	Microcystin dependent protein, putative OS=Vibrio alginolyticus 12G01 GN=V12G01_01600 PE=4 SV=1	204	21370.6		35	4	31.4	6	6	6	5	3	7	6	5	9.012e-07	2.884e-06	3.966e-06	1.263e-06	2.252e-06	1.933e-06	0.833333	0.5	1.16667	0.833333	0.333333	0.167018
tr|Q1V6D0|Q1V6D0_VIBAL	ABC transporter substrate-binding protein OS=Vibrio alginolyticus 12G01 GN=V12G01_23680 PE=4 SV=1	321	33227.7		35	8	31.2	6	7	7	7	2	3	6.66667	4	3.634e-07	4.148e-07	5.667e-07	2.713e-07	9.185e-08	9.058e-08	1.16667	0.285714	0.428571	0.626984	0.472805	0.0647056
tr|Q1V6S7|Q1V6S7_VIBAL	Transcriptional regulator, LysR family protein OS=Vibrio alginolyticus 12G01 GN=V12G01_12168 PE=4 SV=1	319	36227.4		34	10	37.6	8	8	7	3	0	4	7.66667	2.33333	4.797e-07	4.624e-07	4.813e-07	1.13e-07	0	2.395e-07	0.375	0	0.571429	0.315476	0.290327	0.0367736
tr|Q1VC62|Q1VC62_VIBAL	Uncharacterized protein OS=Vibrio alginolyticus 12G01 GN=V12G01_17522 PE=4 SV=1	387	41441.8		34	11	34.4	3	5	1	6	3	4	3	4.33333	1.654e-07	2.09e-07	2.163e-08	1.583e-07	1.281e-07	1.161e-07	2	0.6	4	2.2	1.7088	0.717313
tr|Q1V856|Q1V856_VIBAL	Putative periplasmic protein OS=Vibrio alginolyticus 12G01 GN=V12G01_10481 PE=4 SV=1	318	35789.6		34	7	22.3	6	7	8	6	1	6	7	4.33333	2.276e-07	2.784e-07	3.931e-07	1.972e-07	3.301e-08	2.378e-07	1	0.142857	0.75	0.630952	0.440798	0.174806
tr|Q1VEL9|Q1VEL9_VIBAL	3-oxoacyl-[acyl-carrier-protein] synthase I OS=Vibrio alginolyticus 12G01 GN=V12G01_23078 PE=3 SV=1	403	42562.8		34	8	21.6	7	7	5	4	2	5	6.33333	3.66667	2.225e-07	3.071e-07	2.234e-07	1.979e-07	1.568e-07	1.331e-07	0.571429	0.285714	1	0.619048	0.359516	0.292506
tr|Q1V8Z0|Q1V8Z0_VIBAL	Polar flagellar FlgG OS=Vibrio alginolyticus 12G01 GN=V12G01_15455 PE=4 SV=1	262	27947.8		34	5	19.1	5	7	7	5	4	4	6.33333	4.33333	4.769e-07	5.231e-07	5.699e-07	1.015e-06	6.416e-07	3.377e-07	1	0.571429	0.571429	0.714286	0.247436	0.389743
tr|Q1V905|Q1V905_VIBAL	Outer membrane protein OmpA OS=Vibrio alginolyticus 12G01 GN=V12G01_15380 PE=3 SV=1	320	34430		34	9	44.4	3	7	6	6	4	7	5.33333	5.66667	9.728e-08	4.532e-07	3.334e-07	4.824e-07	3.89e-07	6.124e-07	2	0.571429	1.16667	1.24603	0.717585	0.19407
tr|Q1V9A9|Q1V9A9_VIBAL	ATP-dependent RNA helicase DeaD OS=Vibrio alginolyticus 12G01 GN=deaD PE=3 SV=1	643	71320.3		34	15	26.6	8	6	7	3	2	5	7	3.33333	2.967e-07	1.773e-07	2.229e-07	5.363e-08	2.216e-08	1.3e-07	0.375	0.333333	0.714286	0.474206	0.208956	0.07861
tr|Q1V9J3|Q1V9J3_VIBAL	Arginine deiminase OS=Vibrio alginolyticus 12G01 GN=arcA PE=3 SV=1	406	45729.9		34	9	24.9	6	7	6	4	2	6	6.33333	4	3.181e-07	1.342e-07	2.58e-07	2.39e-07	1.299e-07	5.637e-07	0.666667	0.285714	1	0.650794	0.357407	0.41901
tr|Q1V560|Q1V560_VIBAL	Uncharacterized protein OS=Vibrio alginolyticus 12G01 GN=V12G01_20593 PE=4 SV=1	248	28259.7		34	9	44.4	6	7	6	7	0	4	6.33333	3.66667	3.273e-07	3.801e-07	5.323e-07	3.768e-07	0	3.287e-07	1.16667	0	0.666667	0.611111	0.585314	0.185594
tr|Q1VFN6|Q1VFN6_VIBAL	Superoxide dismutase [Cu-Zn] OS=Vibrio alginolyticus 12G01 GN=V12G01_05296 PE=3 SV=1	171	17714.8		34	5	45	2	5	7	3	4	4	4.66667	3.66667	1.471e-07	3.227e-07	5.853e-07	3.761e-07	5.425e-07	3.122e-07	1.5	0.8	0.571429	0.957143	0.48382	0.538321
tr|Q1VFP7|Q1VFP7_VIBAL	Uncharacterized protein OS=Vibrio alginolyticus 12G01 GN=V12G01_05241 PE=4 SV=1	129	14650.4		34	10	69	6	9	6	2	1	5	7	2.66667	4.178e-07	8.756e-07	1.46e-06	4.708e-07	3.73e-07	8.546e-07	0.333333	0.111111	0.833333	0.425926	0.369907	0.166601
tr|Q1V5X8|Q1V5X8_VIBAL	Uncharacterized protein OS=Vibrio alginolyticus 12G01 GN=V12G01_20491 PE=4 SV=1	250	28240.3		34	14	50.4	8	6	8	3	3	2	7.33333	2.66667	4.787e-07	1.842e-07	6.408e-07	4.087e-08	1.912e-07	3.459e-08	0.375	0.5	0.25	0.375	0.125	0.0295685
tr|Q1V6R7|Q1V6R7_VIBAL	Putative dihydroxyacetone kinase OS=Vibrio alginolyticus 12G01 GN=V12G01_12218 PE=4 SV=1	352	38497		33	8	19.6	9	6	5	5	2	4	6.66667	3.66667	5.77e-07	3.095e-07	2.8e-07	2.158e-07	1.709e-07	2.023e-07	0.555556	0.333333	0.8	0.562963	0.233422	0.150971
tr|Q1VC30|Q1VC30_VIBAL	Putative tricarboxylic transport TctC OS=Vibrio alginolyticus 12G01 GN=V12G01_17682 PE=4 SV=1	323	34899.7		33	7	26.6	7	8	5	5	2	5	6.66667	4	5.062e-07	5.889e-07	3.105e-07	2.108e-07	2.02e-07	4.876e-07	0.714286	0.25	1	0.654762	0.378527	0.235719
tr|Q1V7T1|Q1V7T1_VIBAL	Uncharacterized protein OS=Vibrio alginolyticus 12G01 GN=V12G01_19686 PE=4 SV=1	218	24759.3		33	7	36.7	6	4	8	4	2	5	6	3.66667	5.931e-07	2.632e-07	1.048e-06	2.295e-07	1.351e-07	3.29e-07	0.666667	0.5	0.625	0.597222	0.0867361	0.0581424
tr|Q1V3J9|Q1V3J9_VIBAL	Fructose-1,6-bisphosphatase (Fragment) OS=Vibrio alginolyticus 12G01 GN=V12G01_11983 PE=3 SV=1	314	34487.2		33	7	29.6	8	8	6	3	4	3	7.33333	3.33333	9.16e-07	5.286e-07	4.498e-07	3.332e-07	3.902e-07	5.219e-07	0.375	0.5	0.5	0.458333	0.0721688	0.22613
tr|Q1VAC3|Q1VAC3_VIBAL	4-hydroxy-3-methylbut-2-en-1-yl diphosphate synthase OS=Vibrio alginolyticus 12G01 GN=ispG PE=3 SV=1	372	40697.3		33	13	40.3	6	6	5	7	3	4	5.66667	4.66667	3.042e-07	2.704e-07	2.01e-07	1.303e-07	1.849e-07	1.2e-07	1.16667	0.5	0.8	0.822222	0.333888	0.214584
tr|Q1V617|Q1V617_VIBAL	Diaminopimelate decarboxylase OS=Vibrio alginolyticus 12G01 GN=lysA PE=1 SV=1	417	46040.7		33	10	25.7	8	7	9	3	1	4	8	2.66667	3.879e-07	1.745e-07	3.485e-07	7.989e-08	1.744e-07	2.067e-07	0.375	0.142857	0.444444	0.320767	0.157939	0.165594
tr|Q1V3Z8|Q1V3Z8_VIBAL	Elongation factor P-like protein OS=Vibrio alginolyticus 12G01 GN=V12G01_16302 PE=3 SV=1	188	20812.5		32	8	39.4	6	5	7	5	1	4	6	3.33333	1.833e-06	1.619e-06	1.399e-06	9.545e-07	1.744e-07	8.658e-07	0.833333	0.2	0.571429	0.534921	0.318241	0.0381424
tr|Q1VE42|Q1VE42_VIBAL	Uncharacterized protein OS=Vibrio alginolyticus 12G01 GN=V12G01_18577 PE=4 SV=1	171	18186.7		32	3	29.2	5	5	4	6	4	4	4.66667	4.66667	1.16e-06	1.571e-06	1.087e-06	1.373e-06	1.238e-06	9.307e-07	1.2	0.8	1	1	0.2	0.583358
tr|Q1V9E7|Q1V9E7_VIBAL	MSHA pilin protein MshA OS=Vibrio alginolyticus 12G01 GN=V12G01_14434 PE=4 SV=1	155	16340.4		32	6	40.6	4	5	5	6	2	6	4.66667	4.66667	3.707e-07	3.384e-07	8.442e-07	7.565e-07	2.177e-07	7.989e-07	1.5	0.4	1.2	1.03333	0.568624	0.546091
tr|Q1VAC0|Q1VAC0_VIBAL	Nucleoside diphosphate kinase OS=Vibrio alginolyticus 12G01 GN=ndk PE=3 SV=1	141	15897.9		32	7	46.8	7	6	4	4	2	5	5.66667	3.66667	1.185e-06	8.074e-07	8.44e-07	3.062e-07	1.776e-07	5.712e-07	0.571429	0.333333	1.25	0.718254	0.475645	0.0441785
tr|Q1V5U6|Q1V5U6_VIBAL	Uncharacterized protein OS=Vibrio alginolyticus 12G01 GN=V12G01_13289 PE=4 SV=1	90	9884.84		32	4	45.6	3	7	6	3	2	5	5.33333	3.33333	8.029e-07	1.73e-06	1.807e-06	1.245e-06	9.198e-07	1.967e-06	1	0.285714	0.833333	0.706349	0.373691	0.628948
tr|Q1VB55|Q1VB55_VIBAL	Uncharacterized protein OS=Vibrio alginolyticus 12G01 GN=V12G01_01460 PE=4 SV=1	199	22125.1		32	7	25.6	5	8	7	5	2	3	6.66667	3.33333	8.993e-07	1.213e-06	1.221e-06	3.598e-07	2.966e-07	3.874e-07	1	0.25	0.428571	0.559524	0.391773	0.0265632
tr|Q1V6E0|Q1V6E0_VIBAL	Oligopeptide ABC transporter, periplasmic oligopeptide-binding protein OS=Vibrio alginolyticus 12G01 GN=V12G01_23630 PE=4 SV=1	568	63711.8		32	13	24.8	5	5	7	6	2	4	5.66667	4	1.343e-07	1.117e-07	3.448e-07	1.634e-07	5.742e-08	1.588e-07	1.2	0.4	0.571429	0.72381	0.421207	0.307379
tr|Q1V7S6|Q1V7S6_VIBAL	Phosphoserine aminotransferase OS=Vibrio alginolyticus 12G01 GN=serC PE=1 SV=1	364	40028.3		32	8	28.6	6	9	4	4	3	2	6.33333	3	4.711e-07	4.352e-07	2.036e-07	8.149e-08	2.137e-07	1.017e-07	0.666667	0.333333	0.5	0.5	0.166667	0.0799702
tr|Q1VBJ4|Q1VBJ4_VIBAL	Uncharacterized protein OS=Vibrio alginolyticus 12G01 GN=V12G01_08058 PE=4 SV=1	164	18411.1		31	4	32.9	8	8	6	3	2	3	7.33333	2.66667	5.55e-07	6.795e-07	6.549e-07	3.717e-07	7.747e-07	5.006e-07	0.375	0.25	0.5	0.375	0.125	0.521858
tr|Q1V7J4|Q1V7J4_VIBAL	UTP-glucose-1-phosphate uridylyltransferase OS=Vibrio alginolyticus 12G01 GN=V12G01_11668 PE=4 SV=1	292	32346.2		31	5	22.9	5.5	7.5	4.5	3.5	0.5	3.5	5.83333	2.5	1.468e-06	6.55e-07	5.36e-07	2.067e-07	4.756e-08	3.955e-07	0.636364	0.0666667	0.777778	0.493603	0.376438	0.0206164
tr|Q1V5L2|Q1V5L2_VIBAL	Pyridoxine 5'-phosphate synthase OS=Vibrio alginolyticus 12G01 GN=pdxJ PE=3 SV=1	244	26821		31	9	31.1	7	3	6	2	2	5	5.33333	3	6.423e-07	2.132e-07	6.887e-07	1.11e-07	1.745e-07	3.425e-07	0.285714	0.666667	0.833333	0.595238	0.28071	0.0833879
tr|Q1V323|Q1V323_VIBAL	50S ribosomal protein L4 OS=Vibrio alginolyticus 12G01 GN=rplD PE=3 SV=1	200	21928.6		30	7	36	1	3	4	5	4	6	2.66667	5	6.162e-07	1.319e-06	4.221e-07	5.488e-07	4.623e-06	8.151e-07	5	1.33333	1.5	2.61111	2.07052	0.0239617
tr|Q1V377|Q1V377_VIBAL	30S ribosomal protein S8 OS=Vibrio alginolyticus 12G01 GN=rpsH PE=3 SV=1	130	14002.6		30	6	56.9	6	5	5	1	5	5	5.33333	3.66667	1.23e-06	1.179e-06	7.267e-07	6.245e-08	1.392e-06	9.395e-07	0.166667	1	1	0.722222	0.481125	0.307486
tr|Q1V398|Q1V398_VIBAL	Tyrosine--tRNA ligase OS=Vibrio alginolyticus 12G01 GN=tyrS PE=3 SV=1	395	44335.8		30	9	27.1	6	6	4	2	1	4	5.33333	2.33333	3.324e-07	1.31e-07	2.28e-07	4.425e-08	3.236e-09	1.052e-07	0.333333	0.166667	1	0.5	0.440959	0.0544315
tr|Q1VD23|Q1VD23_VIBAL	Putative translation elongation factor G OS=Vibrio alginolyticus 12G01 GN=V12G01_02655 PE=4 SV=1	674	74478		30	10	16.8	7	6	5	4	0	2	6	2	1.783e-07	5.255e-08	9.407e-08	5.291e-08	0	8.3e-08	0.571429	0	0.4	0.32381	0.293234	0.183341
tr|Q1VDI5|Q1VDI5_VIBAL	Polyhydroxyalkanoic acid synthase OS=Vibrio alginolyticus 12G01 GN=V12G01_01845 PE=4 SV=1	591	67309		30	9	24.2	4	6	8	4	0	3	6	2.33333	1.161e-07	1.614e-07	1.753e-07	8.366e-08	0	9.674e-08	1	0	0.375	0.458333	0.505181	0.152595
tr|Q1V8H7|Q1V8H7_VIBAL	Uncharacterized protein OS=Vibrio alginolyticus 12G01 GN=V12G01_08390 PE=4 SV=1	373	41064.4		30	9	25.5	3	8	4	7	2	3	5	4	7.711e-08	4.802e-07	1.941e-07	3.114e-07	1.186e-07	2.315e-07	2.33333	0.25	0.75	1.11111	1.0876	0.576616
tr|Q1V4J1|Q1V4J1_VIBAL	Tryptophanase OS=Vibrio alginolyticus 12G01 GN=tnaA PE=1 SV=1	466	52584.2		30	12	31.3	3	6	6	4	1	1	5	2	7.023e-08	1.359e-07	2.53e-07	8.135e-08	1.549e-08	3.483e-08	1.33333	0.166667	0.166667	0.555556	0.673575	0.0968289
tr|Q1V9D3|Q1V9D3_VIBAL	Uncharacterized protein OS=Vibrio alginolyticus 12G01 GN=V12G01_14504 PE=4 SV=1	84	9663.8		30	6	65.5	6	7	8	3	1	5	7	3	2.057e-06	7.409e-07	1.728e-06	4.991e-07	4.015e-07	1.478e-06	0.5	0.142857	0.625	0.422619	0.250212	0.0807736
tr|Q1VAC7|Q1VAC7_VIBAL	GTPase Der OS=Vibrio alginolyticus 12G01 GN=der PE=3 SV=1	498	55858.8		30	11	25.3	8	6	5	3	2	4	6.33333	3	2.935e-07	1.875e-07	2.335e-07	6.886e-08	4.196e-08	1.372e-07	0.375	0.333333	0.8	0.502778	0.258244	0.0984357
tr|Q1VG68|Q1VG68_VIBAL	Uncharacterized protein OS=Vibrio alginolyticus 12G01 GN=V12G01_04386 PE=4 SV=1	365	40150.9		30	12	36.2	6	6	3	4	2	2	5	2.66667	2.365e-07	2.31e-07	3.083e-07	9.897e-08	1.299e-07	6.409e-08	0.666667	0.333333	0.666667	0.555556	0.19245	0.108353
tr|Q1V340|Q1V340_VIBAL	Superoxide dismutase (Fragment) OS=Vibrio alginolyticus 12G01 GN=V12G01_23530 PE=3 SV=1	164	18233.9		30	4	17.1	2.98	4.96	5.95	3.98	2.98	3.98	4.63	3.64667	2.134e-06	2.006e-06	2.806e-06	7.91e-07	1.313e-06	2.585e-06	1.33557	0.600806	0.668908	0.868428	0.405988	0.152319
tr|Q1V676|Q1V676_VIBAL	Ribonuclease R OS=Vibrio alginolyticus 12G01 GN=rnr PE=3 SV=1	835	95179.6		30	19	23.6	6	5	11	2	2	0	7.33333	1.33333	4.33e-08	3.404e-08	1.629e-07	3.757e-09	7.078e-09	0	0.333333	0.4	0	0.244444	0.214303	0.041577
tr|Q1V6M6|Q1V6M6_VIBAL	Putative iron-regulated protein A OS=Vibrio alginolyticus 12G01 GN=V12G01_16432 PE=4 SV=1	420	45522.4		30	12	32.4	3	7	8	3	1	4	6	2.66667	1.356e-07	2.5e-07	4.629e-07	5.547e-08	3.193e-08	1.757e-07	1	0.142857	0.5	0.547619	0.430551	0.0737938
tr|Q1V783|Q1V783_VIBAL	Autonomous glycyl radical cofactor OS=Vibrio alginolyticus 12G01 GN=grcA PE=3 SV=1	125	13942.1		29	11	71.2	7	8	4	2	0	4	6.33333	2	3.208e-06	2.585e-06	1.286e-06	2.865e-07	0	1.266e-06	0.285714	0	1	0.428571	0.515079	0.00657598
tr|Q1VC87|Q1VC87_VIBAL	6-phosphogluconolactonase OS=Vibrio alginolyticus 12G01 GN=V12G01_17397 PE=4 SV=1	238	26077.1		29	6	34	3	5	4	3	5	2	4	3.33333	4.065e-07	4.139e-07	3.146e-07	2.81e-07	4.058e-07	3.39e-07	1	1	0.5	0.833333	0.288675	0.590487
tr|Q1V394|Q1V394_VIBAL	Transcription elongation factor GreA OS=Vibrio alginolyticus 12G01 GN=greA PE=3 SV=1	157	17504		29	8	56.7	5	5	7	5	2	4	5.66667	3.66667	1.389e-06	1.099e-06	9.854e-07	5.347e-07	5.959e-07	9.265e-07	1	0.4	0.571429	0.657143	0.309047	0.135596
tr|Q1VCX0|Q1VCX0_VIBAL	Flagellar basal-body rod protein C OS=Vibrio alginolyticus 12G01 GN=flgC PE=4 SV=1	144	15636.6		29	4	34	2	4	4	2	2	1	3.33333	1.66667	1.946e-07	3.233e-07	1.943e-07	1.294e-07	4.026e-07	1.403e-07	1	0.5	0.25	0.583333	0.381881	0.652157
tr|Q1VEK9|Q1VEK9_VIBAL	Amidophosphoribosyltransferase OS=Vibrio alginolyticus 12G01 GN=V12G01_23128 PE=3 SV=1	504	56040.5		29	10	26.8	7	6	4	1	0	2	5.66667	1	2.739e-07	1.606e-07	4.749e-08	2.34e-09	0	6.705e-08	0.142857	0	0.5	0.214286	0.257539	0.0455048
tr|Q1V9C1|Q1V9C1_VIBAL	Single-stranded DNA-binding protein OS=Vibrio alginolyticus 12G01 GN=V12G01_14564 PE=4 SV=1	179	19916.6		29	7	35.2	6	5	5	4	3	4	5.33333	3.66667	2.56e-07	2.297e-07	4.705e-07	3.734e-07	5.067e-07	6.072e-07	0.666667	0.6	0.8	0.688889	0.101835	0.237734
tr|Q1VF74|Q1VF74_VIBAL	Glycerol kinase OS=Vibrio alginolyticus 12G01 GN=glpK PE=3 SV=1	505	55743.8		29	10	21.6	4	5	7	3	3	4	5.33333	3.33333	1.159e-07	1.042e-07	1.593e-07	1.658e-08	2.697e-07	6.902e-08	0.75	0.6	0.571429	0.640476	0.0959202	0.656999
tr|Q1V571|Q1V571_VIBAL	D-lactate dehydrogenase OS=Vibrio alginolyticus 12G01 GN=V12G01_03537 PE=3 SV=1	331	36818.4		29	7	26.6	6	6	7	5	0	3	6.33333	2.66667	7.378e-07	4.459e-07	8.352e-07	1.541e-07	0	3.047e-07	0.833333	0	0.428571	0.420635	0.416723	0.0232221
tr|Q1VAQ9|Q1VAQ9_VIBAL	33 kDa chaperonin OS=Vibrio alginolyticus 12G01 GN=hslO PE=3 SV=1	291	32398.2		29	6	21.6	6	5	6	6	1	4	5.66667	3.66667	6.299e-07	6.389e-07	7.402e-07	3.288e-07	8.075e-08	2.916e-07	1	0.2	0.666667	0.622222	0.401848	0.0510521
tr|Q1VCS9|Q1VCS9_VIBAL	Carbonic anhydrase OS=Vibrio alginolyticus 12G01 GN=V12G01_03125 PE=4 SV=1	239	26460.2		28	7	51.9	7	3	5	3	3	2	5	2.66667	5.337e-07	5.746e-07	5.418e-07	1.597e-07	2.206e-07	4.677e-08	0.428571	1	0.4	0.609524	0.338464	0.0342997
tr|Q1V3W1|Q1V3W1_VIBAL	Bacterial nucleoid DNA-binding protein OS=Vibrio alginolyticus 12G01 GN=V12G01_00065 PE=3 SV=1	90	9463.05		28	5	72.2	6	5	6	3	3	4	5.66667	3.33333	3.338e-06	2.172e-06	2.865e-06	8.677e-07	5.481e-06	3.638e-06	0.5	0.6	0.666667	0.588889	0.083887	0.34664
tr|Q1VEA1|Q1VEA1_VIBAL	Uncharacterized protein OS=Vibrio alginolyticus 12G01 GN=V12G01_18282 PE=4 SV=1	299	34548.7		28	6	22.4	3	4	3	2	0	4	3.33333	2	1.64e-07	1.647e-07	2.646e-07	7.185e-08	0	1.265e-07	0.666667	0	1.33333	0.666667	0.666667	0.105007
tr|Q1VEY4|Q1VEY4_VIBAL	Acyl-[acyl-carrier-protein]--UDP-N-acetylglucosamine O-acyltransferase OS=Vibrio alginolyticus 12G01 GN=lpxA PE=3 SV=1	262	28320.6		28	7	26.7	5	5	7	3	2	3	5.66667	2.66667	2.005e-07	1.95e-07	5.591e-07	6.061e-08	3.001e-07	1.042e-07	0.6	0.4	0.428571	0.47619	0.10817	0.152387
tr|Q1V507|Q1V507_VIBAL	Phosphopentomutase OS=Vibrio alginolyticus 12G01 GN=deoB PE=3 SV=1	406	44224.1		28	10	27.1	5	7	5	2	2	3	5.66667	2.33333	3.055e-07	2.044e-07	3.294e-07	5.278e-08	3.679e-08	6.489e-08	0.4	0.285714	0.6	0.428571	0.159079	0.0378789
tr|Q1VA78|Q1VA78_VIBAL	UPF0319 protein V12G01_20763 OS=Vibrio alginolyticus 12G01 GN=V12G01_20763 PE=3 SV=1	234	25917.2		28	6	35.9	7	5	5	4	1	6	5.66667	3.66667	4.888e-07	5.887e-07	2.71e-07	4.024e-07	2.459e-07	4.858e-07	0.571429	0.2	1.2	0.657143	0.50548	0.493985
tr|Q1VAJ1|Q1VAJ1_VIBAL	Gamma-glutamyl phosphate reductase OS=Vibrio alginolyticus 12G01 GN=proA PE=3 SV=1	411	44402		28	11	27	7	6	8	1	1	2	7	1.33333	4.06e-07	1.696e-07	4.078e-07	3.355e-08	2.404e-08	1.434e-07	0.142857	0.166667	0.25	0.186508	0.0562597	0.037288
tr|Q1V5L8|Q1V5L8_VIBAL	CTP synthase OS=Vibrio alginolyticus 12G01 GN=pyrG PE=3 SV=1	546	60127.1		28	11	18.1	6	4	3	1	5	4	4.33333	3.33333	1.208e-07	4.386e-08	4.348e-08	6.989e-09	5.081e-07	7.513e-08	0.166667	1.25	1.33333	0.916667	0.650854	0.109207
tr|Q1VAS9|Q1VAS9_VIBAL	Cytochrome c4 OS=Vibrio alginolyticus 12G01 GN=V12G01_11008 PE=3 SV=1	205	21931.9		28	5	22.9	1	2	4	2	0	1	2.33333	1	1.274e-08	3.651e-08	1.064e-07	1.991e-08	0	5.594e-08	2	0	0.25	0.75	1.08972	0.289654
tr|Q1VBD5|Q1VBD5_VIBAL	Uncharacterized protein OS=Vibrio alginolyticus 12G01 GN=V12G01_01060 PE=4 SV=1	172	19030.6		27	8	43.6	3	5	5	3	0	3	4.33333	2	2.455e-07	3.378e-07	4.741e-07	4.946e-07	0	3.162e-07	1	0	0.6	0.533333	0.503322	0.404939
tr|Q1VBI3|Q1VBI3_VIBAL	Uncharacterized protein OS=Vibrio alginolyticus 12G01 GN=V12G01_08113 PE=4 SV=1	738	84003		27	17	26.4	8	6	6	1	1	3	6.66667	1.66667	9.374e-08	4.538e-08	6.692e-08	8.795e-10	1.142e-07	2.879e-08	0.125	0.166667	0.5	0.263889	0.205537	0.449645
tr|Q1VBU7|Q1VBU7_VIBAL	Uncharacterized protein OS=Vibrio alginolyticus 12G01 GN=V12G01_07543 PE=4 SV=1	176	20062.3		27	6	38.6	4	7	5	2	2	4	5.33333	2.66667	8.243e-07	1.071e-06	5.225e-07	1.068e-07	2.679e-07	5.162e-07	0.5	0.285714	0.8	0.528571	0.258331	0.0498618
tr|Q1V7U5|Q1V7U5_VIBAL	Putative lipoprotein OS=Vibrio alginolyticus 12G01 GN=V12G01_19616 PE=3 SV=1	219	23357.9		27	5	24.7	6	6	4	4	2	4	5.33333	3.33333	6.513e-07	3.951e-07	4.474e-07	3.206e-07	5.051e-07	5.627e-07	0.666667	0.333333	1	0.666667	0.333333	0.618882
tr|Q1V854|Q1V854_VIBAL	Thiol:disulfide interchange protein OS=Vibrio alginolyticus 12G01 GN=V12G01_10491 PE=3 SV=1	200	22814.7		27	5	21	5	5	5	4	2	5	5	3.66667	1.27e-06	6.649e-07	1.686e-06	4.03e-07	3.325e-07	9.078e-07	0.8	0.4	1	0.733333	0.305505	0.0623167
tr|Q1VDG2|Q1VDG2_VIBAL	UPF0502 protein V12G01_01960 OS=Vibrio alginolyticus 12G01 GN=V12G01_01960 PE=3 SV=1	216	24004.2		27	8	32.4	8	4	4	6	0	3	5.33333	3	8.903e-07	1.352e-07	2.667e-07	3.231e-07	0	1.107e-07	0.75	0	0.75	0.5	0.433013	0.0659384
tr|Q1VDZ1|Q1VDZ1_VIBAL	Predicted dehydrogenase OS=Vibrio alginolyticus 12G01 GN=V12G01_18832 PE=4 SV=1	346	39008.9		27	8	25.1	5	7	6	5	0	4	6	3	2.206e-07	2.055e-07	3.774e-07	1.348e-07	0	1.952e-07	1	0	0.666667	0.555556	0.509175	0.122342
tr|Q1V428|Q1V428_VIBAL	Pantothenate synthetase OS=Vibrio alginolyticus 12G01 GN=panC PE=3 SV=1	301	33590.2		27	9	39.2	7	7	6	4	0	3	6.66667	2.33333	6.419e-07	3.561e-07	5.674e-07	2.418e-07	0	3.032e-07	0.571429	0	0.5	0.357143	0.31135	0.0612795
tr|Q1V9F3|Q1V9F3_VIBAL	Uncharacterized protein OS=Vibrio alginolyticus 12G01 GN=V12G01_14404 PE=4 SV=1	1306	142995		27	13	11.9	3	4	3	10	1	3	3.33333	4.66667	1.083e-08	2.914e-08	1.61e-08	7.358e-08	4.361e-09	1.945e-08	3.33333	0.25	1	1.52778	1.608	0.408825
tr|Q1V9I8|Q1V9I8_VIBAL	Uncharacterized protein OS=Vibrio alginolyticus 12G01 GN=V12G01_14229 PE=4 SV=1	129	13768.2		27	5	38.8	4	6	5	4	3	3	5	3.33333	8.923e-07	8.04e-07	1.794e-06	6.147e-07	4.544e-07	4.621e-07	1	0.5	0.6	0.7	0.264575	0.0584655
tr|Q1VAP3|Q1VAP3_VIBAL	Fe/S biogenesis protein NfuA OS=Vibrio alginolyticus 12G01 GN=nfuA PE=3 SV=1	194	21054.2		27	4	26.3	4	4	5	3	4	4	4.33333	3.66667	1.541e-07	2.334e-07	2.867e-07	6.445e-08	3.5e-07	2.103e-07	0.75	1	0.8	0.85	0.132288	0.634159
tr|Q1VEG2|Q1VEG2_VIBAL	Uncharacterized protein OS=Vibrio alginolyticus 12G01 GN=V12G01_23363 PE=4 SV=1	119	12537.4		26	8	70.6	1.99	7.99	2.99	6.99	2	2	4.32333	3.66333	4.098e-07	5.995e-07	7.338e-07	6.427e-07	5.492e-07	6.089e-07	3.51256	0.250313	0.668896	1.47726	1.77501	0.689501
tr|Q1V752|Q1V752_VIBAL	Protein translocase subunit SecA OS=Vibrio alginolyticus 12G01 GN=secA PE=3 SV=1	909	103574		26	16	20	9	4	1	0	2	2	4.66667	1.33333	2.043e-07	1.65e-08	1.167e-08	0	2.756e-08	1.054e-08	0	0.5	2	0.833333	1.04083	0.0844506
tr|Q1V7G6|Q1V7G6_VIBAL	Biotin sulfoxide reductase OS=Vibrio alginolyticus 12G01 GN=V12G01_03631 PE=3 SV=1	815	90023.6		26	12	18.4	4	4	6	7	0	3	4.66667	3.33333	4.28e-08	3.004e-08	8.942e-08	1.225e-07	0	5.994e-08	1.75	0	0.5	0.75	0.901388	0.645254
tr|Q1V7J3|Q1V7J3_VIBAL	Triosephosphate isomerase OS=Vibrio alginolyticus 12G01 GN=tpiA PE=3 SV=1	256	27029.8		26	8	30.5	6	5	4	4	2	4	5	3.33333	6.85e-07	4.798e-07	1.425e-06	2.674e-07	3.344e-07	3.387e-07	0.666667	0.4	1	0.688889	0.300617	0.0451307
tr|Q1VCV5|Q1VCV5_VIBAL	Uncharacterized protein OS=Vibrio alginolyticus 12G01 GN=V12G01_02995 PE=4 SV=1	374	42763.9		26	9	29.4	5	7	5	3	1	3	5.66667	2.33333	3.573e-07	2.758e-07	2.98e-07	1.337e-07	2.333e-08	1.893e-07	0.6	0.142857	0.6	0.447619	0.263932	0.0943124
tr|Q1V3B5|Q1V3B5_VIBAL	Putative outer membrane lipoprotein Slp OS=Vibrio alginolyticus 12G01 GN=V12G01_15902 PE=4 SV=1	185	20856.6		26	6	33.5	4	6	6	4	2	3	5.33333	3	4.204e-07	1.262e-06	9.505e-07	2.295e-07	1.256e-07	2.484e-07	1	0.333333	0.5	0.611111	0.346944	0.0182572
tr|Q1VDN1|Q1VDN1_VIBAL	Succinylglutamate desuccinylase OS=Vibrio alginolyticus 12G01 GN=astE PE=3 SV=1	342	38947.8		26	5	17.8	7	5	5	4	1	4	5.66667	3	4.365e-07	1.431e-07	3.82e-07	8.284e-08	6.398e-08	4.895e-07	0.571429	0.2	0.8	0.52381	0.302821	0.286801
tr|Q1V3Y9|Q1V3Y9_VIBAL	Glutathione synthetase OS=Vibrio alginolyticus 12G01 GN=gshB PE=3 SV=1	316	35318.2		26	10	41.5	7	5	6	4	1	3	6	2.66667	5.21e-07	2.475e-07	4.742e-07	2.355e-07	1.009e-07	2.883e-07	0.571429	0.2	0.5	0.42381	0.197088	0.145275
tr|Q1VF41|Q1VF41_VIBAL	Putative lipoprotein OS=Vibrio alginolyticus 12G01 GN=V12G01_22218 PE=4 SV=1	189	20722.7		26	6	30.2	4	5	8	4	0	3	5.66667	2.33333	6.289e-07	4.278e-07	6.31e-07	3.664e-07	0	2.54e-07	1	0	0.375	0.458333	0.505181	0.0653092
tr|Q1V555|Q1V555_VIBAL	Chromosome partition protein MukB OS=Vibrio alginolyticus 12G01 GN=mukB PE=3 SV=1	1489	170092		26	16	12	5	3	3	1	2	1	3.66667	1.33333	4.067e-08	1.837e-08	8.929e-09	4.333e-09	9.798e-08	4.945e-09	0.2	0.666667	0.333333	0.4	0.24037	0.452251
tr|Q1VAB3|Q1VAB3_VIBAL	NifU-related protein OS=Vibrio alginolyticus 12G01 GN=V12G01_13015 PE=4 SV=1	127	13638.8		26	6	41.7	4	4	5	1	3	3	4.33333	2.33333	4.462e-07	5.022e-07	6.487e-07	1.265e-07	8.452e-07	1.546e-07	0.25	0.75	0.6	0.533333	0.25658	0.291265
tr|Q1VB34|Q1VB34_VIBAL	Uncharacterized protein OS=Vibrio alginolyticus 12G01 GN=V12G01_01565 PE=4 SV=1	583	65274.5		26	15	28.1	0	0	0	12	1	8	0	7	0	0	0	2.433e-07	1.228e-09	1.694e-07						0.0136238
tr|Q1VBB1|Q1VBB1_VIBAL	Putative aldehyde dehydrogenase OS=Vibrio alginolyticus 12G01 GN=V12G01_01180 PE=3 SV=1	497	54190.2		25	7	19.3	4.5	5	5	3.5	0	3.5	4.83333	2.33333	2.29e-07	2.611e-07	1.82e-07	9.73e-08	0	1.405e-07	0.777778	0	0.7	0.492593	0.428367	0.106482
tr|Q1VBJ7|Q1VBJ7_VIBAL	Uncharacterized protein OS=Vibrio alginolyticus 12G01 GN=V12G01_08043 PE=4 SV=1	123	14029.3		25	7	39	4	5	5	3	0	4	4.66667	2.33333	1.343e-06	1.505e-06	9.598e-07	1.622e-06	0	7.98e-07	0.75	0	0.8	0.516667	0.448144	0.158857
tr|Q1V3R6|Q1V3R6_VIBAL	Uncharacterized protein OS=Vibrio alginolyticus 12G01 GN=V12G01_06101 PE=4 SV=1	302	31462.1		25	8	41.4	3	3	4	2	0	4	3.33333	2	8.015e-08	9.151e-08	1.675e-07	7.056e-08	0	1.715e-07	0.666667	0	1	0.555556	0.509175	0.430083
tr|Q1VBT4|Q1VBT4_VIBAL	Putative exonuclease SbcC OS=Vibrio alginolyticus 12G01 GN=V12G01_07608 PE=4 SV=1	1018	114538		25	8	8.3	4	4	4	4	5	4	4	4.33333	5.023e-07	3.115e-07	3.501e-07	2.418e-07	3.88e-07	3.141e-07	1	1.25	1	1.08333	0.144338	0.460085
tr|Q1V8U7|Q1V8U7_VIBAL	Chaperone protein HtpG OS=Vibrio alginolyticus 12G01 GN=htpG PE=3 SV=1	634	72380.1		25	16	32.2	10	3	3	0	2	2	5.33333	1.33333	4.932e-07	1.213e-07	7.534e-08	0	7.263e-08	6.658e-08	0	0.666667	0.666667	0.444444	0.3849	0.0485781
tr|Q1V451|Q1V451_VIBAL	Lon protease OS=Vibrio alginolyticus 12G01 GN=lon PE=3 SV=1	783	87970.1		25	14	19.2	7	4	4	3	1	4	5	2.66667	1.866e-07	5.944e-08	5.96e-08	1.527e-08	1.143e-08	8.39e-08	0.428571	0.25	1	0.559524	0.391773	0.157845
tr|Q1VF18|Q1VF18_VIBAL	Proline--tRNA ligase OS=Vibrio alginolyticus 12G01 GN=proS PE=3 SV=1	571	63058		25	13	27.3	4	3	2	2	5	2	3	3	9.278e-08	6.608e-08	5.644e-08	6.111e-08	2.822e-07	1.193e-07	0.5	1.66667	1	1.05556	0.585314	0.187787
tr|Q1V5C9|Q1V5C9_VIBAL	Thioredoxin OS=Vibrio alginolyticus 12G01 GN=V12G01_09853 PE=3 SV=1	108	11712		25	4	44.4	2	4	3	2	6	4	3	4	4.796e-07	3.406e-07	2.726e-07	1.308e-07	1.462e-06	9.406e-07	1	1.5	1.33333	1.27778	0.254588	0.0648204
tr|Q1VAL2|Q1VAL2_VIBAL	Putative alpha helix protein OS=Vibrio alginolyticus 12G01 GN=V12G01_11343 PE=4 SV=1	288	33283		25	9	34	5	5	5	4	0	4	5	2.66667	4.668e-07	3.448e-07	3.317e-07	1.093e-07	0	2.376e-07	0.8	0	0.8	0.533333	0.46188	0.0593029
tr|Q1V745|Q1V745_VIBAL	Uncharacterized protein OS=Vibrio alginolyticus 12G01 GN=V12G01_15947 PE=4 SV=1	612	70524.6		24	9	14.5	4	5	6	7	0	1	5	2.66667	1.145e-07	1.415e-07	1.177e-07	9.398e-08	0	4.194e-08	1.75	0	0.166667	0.638889	0.965852	0.14604
tr|Q1VC36|Q1VC36_VIBAL	Putative translocator protein PopD OS=Vibrio alginolyticus 12G01 GN=V12G01_17652 PE=4 SV=1	334	35367.2		24	12	40.4	8	5	1	5	1	2	4.66667	2.66667	3.887e-07	8.818e-08	8.46e-09	1.391e-07	2.512e-08	7.888e-09	0.625	0.2	2	0.941667	0.940855	0.125934
tr|Q1V7V2|Q1V7V2_VIBAL	Histidine ammonia-lyase OS=Vibrio alginolyticus 12G01 GN=hutH PE=1 SV=1	514	55406.5		24	7	20.2	5	5	4	3	2	3	4.66667	2.66667	2.246e-07	1.695e-07	1.087e-07	1.291e-07	1.284e-07	1.056e-07	0.6	0.4	0.75	0.583333	0.175594	0.406368
tr|Q1VDP1|Q1VDP1_VIBAL	Uncharacterized protein OS=Vibrio alginolyticus 12G01 GN=V12G01_19332 PE=4 SV=1	135	14919.7		24	4	48.1	5	4	5	4	1	5	4.66667	3.33333	1.146e-06	8.365e-07	8.829e-07	4.65e-07	1.54e-06	1.041e-06	0.8	0.25	1	0.683333	0.388373	0.638155
tr|Q1VDW6|Q1VDW6_VIBAL	ABC superfamily (Glycine/betaine/proline transport protein) OS=Vibrio alginolyticus 12G01 GN=V12G01_18957 PE=4 SV=1	335	37000.6		24	8	29.3	5	4	3	6	1	1	4	2.66667	6.07e-07	3.751e-07	4.087e-07	3.86e-07	1.636e-08	1.633e-07	1.2	0.25	0.333333	0.594444	0.526079	0.088238
tr|Q1V9I6|Q1V9I6_VIBAL	UDP-N-acetylglucosamine 1-carboxyvinyltransferase OS=Vibrio alginolyticus 12G01 GN=murA PE=1 SV=1	418	44221.8		24	8	29.4	5	4	7	3	1	3	5.33333	2.33333	2.319e-07	1.707e-07	3.499e-07	5.363e-08	1.747e-07	2.318e-07	0.6	0.25	0.428571	0.42619	0.175012	0.25745
tr|Q1V508|Q1V508_VIBAL	Thymidine phosphorylase OS=Vibrio alginolyticus 12G01 GN=deoA PE=3 SV=1	442	47189.7		24	12	42.5	8	3	8	1	3	1	6.33333	1.66667	5.274e-07	1.363e-07	3.005e-07	2.437e-08	1.06e-07	4.3e-08	0.125	1	0.125	0.416667	0.505181	0.0330542
tr|Q1VFI7|Q1VFI7_VIBAL	Uncharacterized protein OS=Vibrio alginolyticus 12G01 GN=V12G01_05541 PE=4 SV=1	750	83459.1		24	11	14.9	3	7	10	2	0	1	6.66667	1	3.794e-08	1.41e-07	3.332e-07	2.126e-08	0	1.754e-08	0.666667	0	0.1	0.255556	0.359526	0.0272306
tr|Q1VA63|Q1VA63_VIBAL	Uncharacterized protein OS=Vibrio alginolyticus 12G01 GN=V12G01_20838 PE=4 SV=1	325	36425.7		24	6	24.6	5	5	5	6	1	2	5	3	2.194e-07	2.527e-07	3.928e-07	2.211e-07	1.138e-07	1.485e-07	1.2	0.2	0.4	0.6	0.52915	0.204837
tr|Q1V5K4|Q1V5K4_VIBAL	Periplasmic negative regulator of sigmaE OS=Vibrio alginolyticus 12G01 GN=rseB PE=4 SV=1	319	35991.4		24	10	34.2	7	6	2	3	1	4	5	2.66667	4.471e-07	5.201e-07	2.047e-07	1.112e-07	4.962e-08	1.891e-07	0.428571	0.166667	2	0.865079	0.991555	0.0568629
tr|Q1V608|Q1V608_VIBAL	Leucine-responsive regulatory protein OS=Vibrio alginolyticus 12G01 GN=V12G01_20341 PE=4 SV=1	164	18828.9		24	8	40.2	3	5	4	3	3	2	4	2.66667	9.399e-07	2.417e-07	4.932e-07	1.458e-07	8.75e-07	2.374e-07	1	0.6	0.5	0.7	0.264575	0.346053
tr|Q1VE79|Q1VE79_VIBAL	N-acetyl-D-glucosamine kinase OS=Vibrio alginolyticus 12G01 GN=nagK PE=3 SV=1	302	32813.5		23	5	15.2	4	3.99	3.99	3.99	1	2	3.99333	2.33	1.148e-07	8.592e-08	1.432e-07	4.851e-08	9.606e-09	4.518e-08	0.9975	0.250627	0.501253	0.583127	0.380108	0.120612
tr|Q1V7T0|Q1V7T0_VIBAL	Thioredoxin reductase OS=Vibrio alginolyticus 12G01 GN=V12G01_19691 PE=3 SV=1	319	34386		23	8	35.4	5	7	4	2	1	2	5.33333	1.66667	2.158e-07	1.619e-07	2.364e-07	3.301e-08	9.936e-08	5.406e-08	0.4	0.142857	0.5	0.347619	0.184243	0.0882891
tr|Q1V8A4|Q1V8A4_VIBAL	Bifunctional protein GlmU OS=Vibrio alginolyticus 12G01 GN=glmU PE=3 SV=1	453	48816.9		23	8	26.5	3	3	2	1	1	3	2.66667	1.66667	2.534e-07	1.563e-07	3.805e-08	3.382e-09	3.658e-08	1.464e-07	0.333333	0.333333	1.5	0.722222	0.673575	0.161471
tr|Q1V4G8|Q1V4G8_VIBAL	30S ribosomal protein S9 OS=Vibrio alginolyticus 12G01 GN=rpsI PE=3 SV=1	130	14651.9		23	8	66.2	2	4	5	3	5	3	3.66667	3.66667	4.365e-07	3.836e-07	7.451e-07	1.886e-07	2.613e-06	3.931e-07	1.5	1.25	0.6	1.11667	0.464579	0.0778193
tr|Q1VEV6|Q1VEV6_VIBAL	Uncharacterized protein OS=Vibrio alginolyticus 12G01 GN=V12G01_22643 PE=4 SV=1	402	43928.4		23	11	30.1	8	5	6	2	0	1	6.33333	1	2.878e-07	2.197e-07	2.371e-07	9.221e-08	0	4.109e-08	0.25	0	0.166667	0.138889	0.127294	0.0405484
tr|Q1VFE5|Q1VFE5_VIBAL	Anaerobic nitric oxide reductase transcription regulator OS=Vibrio alginolyticus 12G01 GN=V12G01_05751 PE=4 SV=1	172	20098.6		23	6	48.8	4	3	4	3	3	6	3.66667	4	9.777e-07	4.39e-07	6.42e-07	2.194e-07	5.975e-07	8.386e-07	0.75	1	1.5	1.08333	0.381881	0.406814
tr|Q1VFJ1|Q1VFJ1_VIBAL	Outer membrane lipoprotein OS=Vibrio alginolyticus 12G01 GN=V12G01_05521 PE=1 SV=1	84	8681.28		23	4	61.9	3	3	3	5	3	4	3	4	8.068e-07	7.332e-07	1.913e-06	9.182e-07	1.05e-06	9.714e-07	1.66667	1	1.33333	1.33333	0.333333	0.447957
tr|Q1VAB2|Q1VAB2_VIBAL	Cysteine desulfurase IscS OS=Vibrio alginolyticus 12G01 GN=iscS PE=1 SV=1	404	45222.8		23	8	24.3	6	3	5	2	2	3	4.66667	2.33333	4.123e-07	1.231e-07	3.652e-07	5.959e-08	9.667e-08	1.55e-07	0.333333	0.666667	0.6	0.533333	0.176383	0.0849692
tr|Q1V691|Q1V691_VIBAL	Putative arginine/ornithine succinyltransferase OS=Vibrio alginolyticus 12G01 GN=V12G01_14970 PE=4 SV=1	339	37917.7		23	4	15.6	4	5	5	3	2	3	4.66667	2.66667	2.291e-07	1.445e-07	3.365e-07	3.146e-07	3.542e-07	3.799e-07	0.75	0.4	0.6	0.583333	0.175594	0.303116
tr|Q1VBR8|Q1VBR8_VIBAL	Cytoplasmic alpha-amylase OS=Vibrio alginolyticus 12G01 GN=V12G01_07688 PE=4 SV=1	507	58671.2		22	9	21.5	5	5	4	3	1	3	4.66667	2.33333	1.887e-07	2.33e-07	1.202e-07	3.297e-08	6.536e-09	5.55e-08	0.6	0.2	0.75	0.516667	0.284312	0.0503677
tr|Q1V7R2|Q1V7R2_VIBAL	Glutaredoxin 1 OS=Vibrio alginolyticus 12G01 GN=V12G01_19781 PE=4 SV=1	88	10043		22	5	39.8	4	4	5	3	1	4	4.33333	2.66667	1.213e-06	3.923e-07	1.567e-06	3.411e-07	1.619e-07	1.001e-06	0.75	0.25	0.8	0.6	0.304138	0.0753156
tr|Q1V7U1|Q1V7U1_VIBAL	Phosphoribosylaminoimidazole-succinocarboxamide synthase OS=Vibrio alginolyticus 12G01 GN=purC PE=3 SV=1	367	41026.1		22	6	20.2	4	4	6	4	1	2	4.66667	2.33333	8.775e-08	1.031e-07	2.175e-07	1.034e-07	5.811e-08	1.043e-07	1	0.25	0.333333	0.527778	0.411074	0.346465
tr|Q1V3R5|Q1V3R5_VIBAL	Uncharacterized protein OS=Vibrio alginolyticus 12G01 GN=V12G01_06106 PE=4 SV=1	418	44957.6		22	9	29.2	4	4	3	5	0	4	3.66667	3	3.009e-07	2.244e-07	1.143e-07	1.175e-07	0	1.518e-07	1.25	0	1.33333	0.861111	0.746907	0.143061
tr|Q1VE96|Q1VE96_VIBAL	Putative formate dehydrogenase large subunit OS=Vibrio alginolyticus 12G01 GN=V12G01_18307 PE=3 SV=1	951	106940		22	15	19.9	6	5	0	4	0	3	3.66667	2.33333	5.655e-08	2.884e-08	0	2.616e-08	0	3.166e-08	0.666667	0		0.333333	0.471405	0.493747
tr|Q1V4A1|Q1V4A1_VIBAL	Pyruvate kinase OS=Vibrio alginolyticus 12G01 GN=V12G01_00769 PE=3 SV=1	480	51860.8		22	14	37.9	3	5	4	3	2	4	4	3	6.115e-08	7.041e-08	1.494e-07	5.159e-08	1.289e-07	1.392e-07	1	0.4	1	0.8	0.34641	0.623579
tr|Q1V922|Q1V922_VIBAL	Uncharacterized protein OS=Vibrio alginolyticus 12G01 GN=V12G01_07323 PE=4 SV=1	157	17354.9		22	6	43.3	4	4	4	4	3	1	4	2.66667	4.39e-07	3.414e-07	3.128e-07	2.883e-07	6.21e-07	1.134e-07	1	0.75	0.25	0.666667	0.381881	0.633279
tr|Q1V9A5|Q1V9A5_VIBAL	Acetate kinase OS=Vibrio alginolyticus 12G01 GN=ackA PE=3 SV=1	397	43049.9		22	11	36.3	7	6	6	1	1	1	6.33333	1	5.195e-07	2.784e-07	6.162e-07	1.64e-08	9.668e-08	5.942e-08	0.142857	0.166667	0.166667	0.15873	0.0137464	0.0148523
tr|Q1VEZ7|Q1VEZ7_VIBAL	Methionine aminopeptidase OS=Vibrio alginolyticus 12G01 GN=map PE=3 SV=1	292	32399.2		22	7	29.1	7	6	5	1	0	2	6	1	8.531e-07	3.422e-07	6.431e-07	3.632e-08	0	7.562e-08	0.142857	0	0.4	0.180952	0.202703	0.00697131
tr|Q1VA37|Q1VA37_VIBAL	Hit family protein OS=Vibrio alginolyticus 12G01 GN=V12G01_20968 PE=4 SV=1	116	13041.8		22	5	44	5	3	6	1	3	3	4.66667	2.33333	6.957e-07	4.959e-07	1.504e-06	1.308e-07	8.595e-07	4.308e-07	0.2	1	0.5	0.566667	0.404145	0.111702
tr|Q1VA39|Q1VA39_VIBAL	Uncharacterized protein OS=Vibrio alginolyticus 12G01 GN=V12G01_20958 PE=4 SV=1	130	14798.5		22	6	53.8	3	5	3	3	2	2	3.66667	2.33333	5.106e-07	1.381e-06	9.553e-07	4.814e-07	8.861e-07	9.628e-07	1	0.4	0.666667	0.688889	0.300617	0.404374
tr|Q1VA84|Q1VA84_VIBAL	Putative protease OS=Vibrio alginolyticus 12G01 GN=V12G01_13160 PE=4 SV=1	466	52712.2		22	7	18.2	8	4	2	3	0	1	4.66667	1.33333	2.681e-07	1.497e-07	1.119e-07	5.522e-08	0	1.655e-08	0.375	0	0.5	0.291667	0.260208	0.0407311
tr|Q1VAG3|Q1VAG3_VIBAL	Uncharacterized protein OS=Vibrio alginolyticus 12G01 GN=V12G01_12765 PE=4 SV=1	396	44298.4		22	12	35.9	9	6	2	1	1	2	5.66667	1.33333	4.155e-07	1.443e-07	5.24e-08	3.326e-08	7.53e-08	5.011e-08	0.111111	0.166667	1	0.425926	0.497938	0.0719065
tr|Q1V5W1|Q1V5W1_VIBAL	Outer membrane protein assembly factor BamD OS=Vibrio alginolyticus 12G01 GN=bamD PE=1 SV=1	242	27864.3		22	9	38.4	5	5	4	2	0	1	4.66667	1	2.266e-07	1.509e-07	2.184e-07	7.96e-08	0	1.238e-07	0.4	0	0.25	0.216667	0.202073	0.107439
tr|Q1VC35|Q1VC35_VIBAL	Immunogenic protein OS=Vibrio alginolyticus 12G01 GN=V12G01_17657 PE=4 SV=1	323	35038.6		21	11	34.4	4	4	5	6	0	1	4.33333	2.33333	2.222e-07	1.692e-07	4.449e-07	4.269e-07	0	1.26e-07	1.5	0	0.2	0.566667	0.814453	0.298232
tr|Q1VDR3|Q1VDR3_VIBAL	4-hydroxyphenylpyruvate dioxygenase OS=Vibrio alginolyticus 12G01 GN=V12G01_19222 PE=3 SV=1	357	40373.2		21	10	43.1	3	5	4	2	0	0	4	0.666667	1.64e-07	8.759e-08	1.386e-07	2.431e-08	0	0	0.666667	0	0	0.222222	0.3849	0.0321063
tr|Q1V9H6|Q1V9H6_VIBAL	Putative ABC superfamily transport protein OS=Vibrio alginolyticus 12G01 GN=V12G01_14289 PE=4 SV=1	164	18083.4		21	6	34.1	2	4	4	1	2	2	3.33333	1.66667	5.232e-08	1.654e-07	2.497e-07	5.733e-08	1.569e-07	1.085e-07	0.5	0.5	0.5	0.5	0	0.380536
tr|Q1V9T0|Q1V9T0_VIBAL	Glycine cleavage system H protein OS=Vibrio alginolyticus 12G01 GN=gcvH PE=3 SV=1	126	14035.6		21	2	25.4	3	3	3	3	2	5	3	3.33333	5.451e-07	6.548e-07	8.461e-07	3.272e-07	1.075e-06	1.072e-06	1	0.666667	1.66667	1.11111	0.509175	0.438351
tr|Q1V4U1|Q1V4U1_VIBAL	Gamma-glutamyltranspeptidase OS=Vibrio alginolyticus 12G01 GN=V12G01_12345 PE=4 SV=1	576	63348.8		21	11	26.9	0	2	5	3	0	1	2.33333	1.33333	0	4.543e-08	1.275e-07	5.655e-08	0	2.138e-08		0	0.2	0.1	0.141421	0.250465
tr|Q1VF89|Q1VF89_VIBAL	Uncharacterized protein OS=Vibrio alginolyticus 12G01 GN=V12G01_21978 PE=4 SV=1	331	35722		21	4	16	4	5	3	3	0	3	4	2	3.593e-07	3.518e-07	2.982e-07	1.74e-07	0	2.246e-07	0.75	0	1	0.583333	0.520416	0.101845
tr|Q1VFI5|Q1VFI5_VIBAL	Uncharacterized protein OS=Vibrio alginolyticus 12G01 GN=V12G01_05551 PE=4 SV=1	191	21040.4		21	7	41.4	3	5	8	1	1	1	5.33333	1	4.464e-07	5.44e-07	9.538e-07	2.621e-08	1.772e-07	9.387e-08	0.333333	0.2	0.125	0.219444	0.105519	0.0136068
tr|Q1VAX3|Q1VAX3_VIBAL	Purine nucleoside phosphorylase OS=Vibrio alginolyticus 12G01 GN=V12G01_10788 PE=3 SV=1	274	29885.1		21	7	24.5	2	6	3	3	1	1	3.66667	1.66667	2.699e-07	2.495e-07	2.337e-07	1.092e-07	1.019e-08	5.742e-08	1.5	0.166667	0.333333	0.666667	0.726483	0.0552306
tr|Q1V5W2|Q1V5W2_VIBAL	Pseudouridine synthase OS=Vibrio alginolyticus 12G01 GN=V12G01_13209 PE=3 SV=1	325	36678.1		21	6	25.8	9	4	3	3	0	2	5.33333	1.66667	4.909e-07	1.633e-07	1.322e-07	7.805e-08	0	5.251e-08	0.333333	0	0.666667	0.333333	0.333333	0.0358767
tr|Q1VB61|Q1VB61_VIBAL	Uncharacterized protein OS=Vibrio alginolyticus 12G01 GN=V12G01_01430 PE=4 SV=1	252	29560.1		21	6	32.1	3	4	5	3	2	2	4	2.33333	5.655e-07	1.499e-07	2.772e-07	2.019e-07	1.427e-07	1.29e-07	1	0.5	0.4	0.633333	0.321455	0.144944
tr|Q1V6K5|Q1V6K5_VIBAL	Putative outer membrane protein, Ail and OmpX OS=Vibrio alginolyticus 12G01 GN=V12G01_16537 PE=4 SV=1	213	23861.8		21	6	32.4	5	7	5	2	0	1	5.66667	1	7.966e-07	4.983e-07	3.694e-07	3.063e-07	0	1.951e-07	0.4	0	0.2	0.2	0.2	0.0434431
tr|Q1VDL5|Q1VDL5_VIBAL	Integration host factor subunit alpha OS=Vibrio alginolyticus 12G01 GN=ihfA PE=3 SV=1	98	11189		20	5	48	4	4	4	2	2	3	4	2.33333	1.018e-06	8.202e-07	1.366e-06	3.098e-07	3.097e-07	8.391e-07	0.5	0.5	0.75	0.583333	0.144338	0.0678342
tr|Q1V434|Q1V434_VIBAL	Carbonic anhydrase OS=Vibrio alginolyticus 12G01 GN=V12G01_21548 PE=3 SV=1	222	25286.9		20	6	25.7	3	5	5	4	0	2	4.33333	2	3.158e-07	3.257e-07	2.567e-07	1.963e-07	0	1.633e-07	1.33333	0	0.4	0.577778	0.684214	0.109488
tr|Q1VEK2|Q1VEK2_VIBAL	Nucleoid-associated protein V12G01_23163 OS=Vibrio alginolyticus 12G01 GN=V12G01_23163 PE=3 SV=1	109	12018.8		20	3	35.8	3	4	4	3	0	2	3.66667	1.66667	2.2e-07	4.894e-07	1.403e-06	2.23e-07	0	4.118e-07	1	0	0.5	0.5	0.5	0.0368799
tr|Q1V464|Q1V464_VIBAL	Naphthoate synthase OS=Vibrio alginolyticus 12G01 GN=V12G01_00402 PE=3 SV=1	288	31923.6		20	6	19.1	7	3	3	0	0	0	4.33333	0	2.496e-07	6.622e-08	1.542e-07	0	0	0	0	0	0	0	0	0.0142784
tr|Q1V4P0|Q1V4P0_VIBAL	Negative modulator of initiation of replication OS=Vibrio alginolyticus 12G01 GN=seqA PE=3 SV=1	180	20065.6		20	7	41.7	4	5	4	1	1	3	4.33333	1.66667	3.954e-07	3.02e-07	4.644e-07	1.931e-08	3.398e-07	1.965e-07	0.25	0.2	0.75	0.4	0.304138	0.13671
tr|Q1V9U7|Q1V9U7_VIBAL	Amino acid ABC transporter, periplasmic amino acid-binding protein OS=Vibrio alginolyticus 12G01 GN=V12G01_08810 PE=4 SV=1	272	30473.8		20	9	28.3	3	3	5	5	0	3	3.66667	2.66667	1.605e-07	1.385e-07	3.244e-07	1.26e-07	0	1.038e-07	1.66667	0	0.6	0.755556	0.844152	0.116718
tr|Q1V528|Q1V528_VIBAL	30S ribosomal protein S15 OS=Vibrio alginolyticus 12G01 GN=rpsO PE=3 SV=1	89	10044.5		20	4	27	3	2	2	2	4	3	2.33333	3	6.818e-07	4.135e-07	3.252e-07	1.02e-07	6.156e-07	1.466e-07	0.666667	2	1.5	1.38889	0.673575	0.206121
tr|Q1VGD3|Q1VGD3_VIBAL	Probable transcriptional regulatory protein V12G01_04061 OS=Vibrio alginolyticus 12G01 GN=V12G01_04061 PE=3 SV=1	238	26159.8		20	7	23.5	5	2	5	1	1	2	4	1.33333	3.333e-07	1.711e-07	4.655e-07	5.038e-09	4.463e-08	8.433e-08	0.2	0.5	0.4	0.366667	0.152753	0.024204
tr|Q1V679|Q1V679_VIBAL	Tryptophan--tRNA ligase OS=Vibrio alginolyticus 12G01 GN=trpS PE=3 SV=1	338	37749.1		20	5	19.8	4	4	6	2	0	3	4.66667	1.66667	2.489e-07	1.665e-07	3.286e-07	7.619e-08	0	3.632e-07	0.5	0	0.5	0.333333	0.288675	0.240701
tr|Q1VB57|Q1VB57_VIBAL	Uncharacterized protein OS=Vibrio alginolyticus 12G01 GN=V12G01_01450 PE=4 SV=1	441	49336.4		20	10	21.3	7	5	6	1	0	1	6	0.666667	1.978e-07	8.73e-08	2.849e-07	4.912e-08	0	2.219e-08	0.142857	0	0.166667	0.103175	0.0901414	0.0359065
tr|Q1VEL3|Q1VEL3_VIBAL	Acetyl-coenzyme A carboxylase carboxyl transferase subunit beta OS=Vibrio alginolyticus 12G01 GN=accD PE=3 SV=1	308	34023.2		19	11	40.6	2	2	3	1	2	3	2.33333	2	2.282e-07	2.434e-07	2.152e-07	7.283e-08	3.939e-07	1.802e-07	0.5	1	1	0.833333	0.288675	0.651715
tr|Q1V7Z8|Q1V7Z8_VIBAL	Uncharacterized protein OS=Vibrio alginolyticus 12G01 GN=V12G01_06261 PE=4 SV=1	50	5228.75		19	3	82	2	3	1	5	2	4	2	3.66667	1.541e-06	2.916e-06	3.208e-07	2.312e-06	1.3e-06	2.709e-06	2.5	0.666667	4	2.38889	1.66944	0.24579
tr|Q1V805|Q1V805_VIBAL	Prolyl endopeptidase OS=Vibrio alginolyticus 12G01 GN=V12G01_06226 PE=4 SV=1	719	79936.3		19	13	24.2	1	4	6	2	0	0	3.66667	0.666667	1.753e-08	2.665e-08	1.469e-07	1.809e-08	0	0	2	0	0	0.666667	1.1547	0.0681743
tr|Q1VBC9|Q1VBC9_VIBAL	Putative sensor histidine kinase OS=Vibrio alginolyticus 12G01 GN=V12G01_01090 PE=4 SV=1	785	89464.2		19	7	9.6	0	1	0	0	2	0	0.333333	0.666667	0	1.399e-08	0	0	1.155e-07	0		2		2		0.102189
tr|Q1V8D1|Q1V8D1_VIBAL	Uncharacterized protein OS=Vibrio alginolyticus 12G01 GN=V12G01_08620 PE=3 SV=1	266	28751.4		19	6	29.7	3	5	2	3	2	1	3.33333	2	8.308e-08	3.522e-07	2.594e-07	1.774e-07	4.257e-07	1.587e-07	1	0.4	0.5	0.633333	0.321455	0.631928
tr|Q1V959|Q1V959_VIBAL	Putative 3-hydroxyisobutyrate dehydrogenase OS=Vibrio alginolyticus 12G01 GN=V12G01_07138 PE=4 SV=1	301	31502.8		19	7	29.6	3	3	3	3	1	3	3	2.33333	1.902e-07	1.173e-07	1.768e-07	8.209e-08	5.88e-08	1.558e-07	1	0.333333	1	0.777778	0.3849	0.296986
tr|Q1V4Q1|Q1V4Q1_VIBAL	Elongation factor P OS=Vibrio alginolyticus 12G01 GN=efp PE=1 SV=1	188	20670.5		19	4	25.5	3	3	3	4	3	3	3	3.33333	5.442e-07	6.471e-07	6.61e-07	3.484e-07	5.656e-07	4.242e-07	1.33333	1	1	1.11111	0.19245	0.299095
tr|Q1VA45|Q1VA45_VIBAL	Uncharacterized protein OS=Vibrio alginolyticus 12G01 GN=V12G01_20928 PE=4 SV=1	242	27628.8		19	5	28.1	4	3	3	3	0	4	3.33333	2.33333	3.633e-07	3.275e-07	3.58e-07	1.64e-07	0	3.308e-07	0.75	0	1.33333	0.694444	0.668401	0.138755
tr|Q1VFI8|Q1VFI8_VIBAL	Putative TonB system receptor OS=Vibrio alginolyticus 12G01 GN=V12G01_05536 PE=3 SV=1	713	79924.8		19	9	12.8	4	3	7	2	1	1	4.66667	1.33333	9.829e-08	3.984e-08	2.622e-07	1.762e-08	1.809e-08	8.28e-09	0.5	0.333333	0.142857	0.325397	0.178704	0.0422147
tr|Q1V5E7|Q1V5E7_VIBAL	Protein ProQ homolog OS=Vibrio alginolyticus 12G01 GN=proQ PE=3 SV=1	208	23170.3		19	6	36.1	4	5	4	2	0	3	4.33333	1.66667	4.236e-07	5.337e-07	5.023e-07	8.42e-08	0	2.197e-07	0.5	0	0.75	0.416667	0.381881	0.0271073
tr|Q1V5M3|Q1V5M3_VIBAL	tRNA pseudouridine synthase D OS=Vibrio alginolyticus 12G01 GN=truD PE=3 SV=1	347	38668.8		19	7	24.8	2	4	4	2	0	0	3.33333	0.666667	1.263e-07	3.155e-07	2.363e-07	6.145e-08	0	0	1	0	0	0.333333	0.57735	0.023779
tr|Q1VB63|Q1VB63_VIBAL	Uncharacterized protein OS=Vibrio alginolyticus 12G01 GN=V12G01_01420 PE=4 SV=1	136	15613.7		19	4	21.3	3	3	4	4	0	4	3.33333	2.66667	4.821e-07	3.285e-07	5.875e-07	2.528e-07	0	3.572e-07	1.33333	0	1	0.777778	0.693889	0.102295
tr|Q1V6Q3|Q1V6Q3_VIBAL	30S ribosomal protein S21 OS=Vibrio alginolyticus 12G01 GN=rpsU PE=3 SV=1	71	8499.76		19	5	29.6	2	3	3	2	3	1	2.66667	2	3.029e-07	6.115e-07	6.507e-07	2.848e-07	1.187e-06	2.779e-07	1	1	0.333333	0.777778	0.3849	0.573658
tr|Q1V739|Q1V739_VIBAL	Uncharacterized protein OS=Vibrio alginolyticus 12G01 GN=V12G01_15977 PE=4 SV=1	350	39131.4		18	8	24	2	4	3	2	0	0	3	0.666667	1.724e-08	2.121e-08	1.932e-08	1.012e-08	0	0	1	0	0	0.333333	0.57735	0.175588
tr|Q1VCS8|Q1VCS8_VIBAL	Uncharacterized protein OS=Vibrio alginolyticus 12G01 GN=V12G01_03130 PE=4 SV=1	183	20015.2		18	3	18	1.59	2	3.59	2.59	2.59	3.59	2.39333	2.92333	4.766e-07	4.405e-07	4.349e-07	4.148e-07	1.69e-06	7.612e-07	1.62893	1.295	1	1.30798	0.314666	0.0754857
tr|Q1VC39|Q1VC39_VIBAL	Uncharacterized protein OS=Vibrio alginolyticus 12G01 GN=V12G01_17637 PE=4 SV=1	604	66360.7		18	9	14.4	4	5	0	5	0	2	3	2.33333	5.559e-08	8.41e-08	0	1.264e-07	0	3.245e-08	1.25	0		0.625	0.883883	0.64542
tr|Q1V3G6|Q1V3G6_VIBAL	Ketol-acid reductoisomerase OS=Vibrio alginolyticus 12G01 GN=ilvC PE=3 SV=1	494	54716		18	10	26.3	4	1	6	3	2	2	3.66667	2.33333	2.333e-07	1.525e-08	1.737e-07	6.547e-08	1.016e-07	7.687e-08	0.75	2	0.333333	1.02778	0.867361	0.276791
tr|Q1VD56|Q1VD56_VIBAL	Putrescine-binding periplasmic protein OS=Vibrio alginolyticus 12G01 GN=V12G01_02490 PE=3 SV=1	344	38731.2		18	6	24.1	4	4	4	3	0	1	4	1.33333	2.396e-07	9.823e-08	3.738e-07	1.386e-07	0	3.858e-08	0.75	0	0.25	0.333333	0.381881	0.0629628
tr|Q1V3K4|Q1V3K4_VIBAL	Putative hemolysin OS=Vibrio alginolyticus 12G01 GN=V12G01_00170 PE=4 SV=1	299	34025.9		18	6	26.4	3	4	2	2	1	3	3	2	2.706e-07	2.336e-07	1.096e-07	4.473e-08	1.034e-07	2.304e-07	0.666667	0.25	1.5	0.805556	0.636469	0.277012
tr|Q1VDB5|Q1VDB5_VIBAL	Cold shock transcriptional regulator CspA OS=Vibrio alginolyticus 12G01 GN=V12G01_02195 PE=3 SV=1	69	7509.76		18	5	50.7	2	2	2	2	1	2	2	1.66667	1.081e-06	3.767e-07	1.58e-06	5.822e-07	3.914e-07	9.466e-07	1	0.5	1	0.833333	0.288675	0.171107
tr|Q1V3V8|Q1V3V8_VIBAL	Bifunctional purine biosynthesis protein PurH OS=Vibrio alginolyticus 12G01 GN=purH PE=3 SV=1	530	57457.5		18	9	21.9	5	3	2	1	2	1	3.33333	1.33333	9.688e-08	2.265e-08	3.674e-08	3.367e-09	1.02e-07	2.162e-08	0.2	0.666667	0.5	0.455556	0.236487	0.568489
tr|Q1V8T4|Q1V8T4_VIBAL	Flavodoxin OS=Vibrio alginolyticus 12G01 GN=V12G01_15735 PE=3 SV=1	177	19860.4		18	4	27.7	3	3	4	0	3	3	3.33333	2	4.132e-07	3.323e-07	4.35e-07	0	7.285e-07	2.738e-07	0	1	0.75	0.583333	0.520416	0.515124
tr|Q1VEB3|Q1VEB3_VIBAL	Uncharacterized protein OS=Vibrio alginolyticus 12G01 GN=V12G01_18222 PE=4 SV=1	220	24642.7		18	4	20.5	2	3	3	3	2	3	2.66667	2.66667	2.247e-07	2.103e-07	5.703e-07	2.317e-07	1.701e-07	9.935e-08	1.5	0.666667	1	1.05556	0.419435	0.156434
tr|Q1VEV3|Q1VEV3_VIBAL	Arsenate reductase OS=Vibrio alginolyticus 12G01 GN=V12G01_22658 PE=4 SV=1	116	13105.8		18	4	54.3	3	5	6	1	1	2	4.66667	1.33333	7.075e-07	5.297e-07	4.741e-07	1.256e-07	1.292e-07	1.915e-07	0.333333	0.2	0.333333	0.288889	0.07698	0.0337428
tr|Q1V9F4|Q1V9F4_VIBAL	Rod shape-determining protein MreB OS=Vibrio alginolyticus 12G01 GN=V12G01_14399 PE=4 SV=1	347	36927		18	6	20.7	5	2	2	1	2	1	3	1.33333	3.07e-07	1.225e-08	2.694e-08	3.424e-08	8.329e-08	2.603e-08	0.2	1	0.5	0.566667	0.404145	0.175838
tr|Q1V4N2|Q1V4N2_VIBAL	Succinate dehydrogenase catalytic subunit OS=Vibrio alginolyticus 12G01 GN=sdhB PE=4 SV=1	236	26348		18	6	27.1	1	3	4	2	3	3	2.66667	2.66667	6.469e-08	2.857e-07	2.924e-07	8.862e-08	1.723e-07	2.774e-07	2	1	0.75	1.25	0.661438	0.528774
tr|Q1VFZ7|Q1VFZ7_VIBAL	Phosphorylase OS=Vibrio alginolyticus 12G01 GN=V12G01_04741 PE=3 SV=1	817	92631		18	9	12.6	7	3	2	2	0	1	4	1	1.63e-07	3.905e-08	3.78e-08	1.966e-08	0	8.073e-09	0.285714	0	0.5	0.261905	0.250849	0.0660191
tr|Q1V667|Q1V667_VIBAL	RNA-binding protein Hfq OS=Vibrio alginolyticus 12G01 GN=hfq PE=3 SV=1	87	9879.2		18	5	42.5	3	3	2	1	3	3	2.66667	2.33333	6.91e-07	5.656e-07	6.126e-07	4.302e-07	1.146e-06	6.452e-07	0.333333	1	1.5	0.944444	0.585314	0.473063
tr|Q1V6P0|Q1V6P0_VIBAL	Ribonucleoside-diphosphate reductase OS=Vibrio alginolyticus 12G01 GN=V12G01_16362 PE=3 SV=1	760	85719.1		18	12	15.3	7	0	4	1	1	3	3.66667	1.66667	1.019e-07	0	5.545e-08	5.844e-09	3.157e-08	4.081e-08	0.142857		0.75	0.446429	0.429315	0.29223
tr|Q1V2Z7|Q1V2Z7_VIBAL	50S ribosomal protein L10 OS=Vibrio alginolyticus 12G01 GN=rplJ PE=3 SV=1	164	17582		17	6	39.6	1	2	1	1	3	3	1.33333	2.33333	1.198e-07	2.493e-07	2.009e-07	1.085e-07	1.86e-06	4.915e-07	1	1.5	3	1.83333	1.04083	0.0168799
tr|Q1V322|Q1V322_VIBAL	50S ribosomal protein L23 OS=Vibrio alginolyticus 12G01 GN=rplW PE=3 SV=1	100	11139.2		17	3	22	3	3	2	3	2	4	2.66667	3	1.559e-06	6.932e-07	7.857e-07	7.4e-07	1.098e-06	9.557e-07	1	0.666667	2	1.22222	0.693889	0.579201
tr|Q1V764|Q1V764_VIBAL	5'-methylthioadenosine/S-adenosylhomocysteine nucleosidase OS=Vibrio alginolyticus 12G01 GN=mtnN PE=3 SV=1	231	24833.4		17	3	21.6	3	3	4	2	1	1	3.33333	1.33333	2.427e-07	2.497e-07	4.021e-07	7.985e-08	1.652e-08	1.347e-07	0.666667	0.333333	0.25	0.416667	0.220479	0.0556174
tr|Q1V3Q5|Q1V3Q5_VIBAL	S-ribosylhomocysteine lyase OS=Vibrio alginolyticus 12G01 GN=luxS PE=3 SV=1	172	19156.6		17	6	45.3	2	2	3	2	2	3	2.33333	2.33333	3.137e-07	3.005e-07	2.772e-07	2.295e-07	7.938e-07	4.803e-07	1	1	1	1	0	0.191341
tr|Q1V8K0|Q1V8K0_VIBAL	Outer-membrane lipoprotein carrier protein (Fragment) OS=Vibrio alginolyticus 12G01 GN=lolA PE=3 SV=1	97	10931.6		17	5	40.2	3	4	4	3	1	2	3.66667	2	2.562e-07	9.398e-07	9.233e-07	4.31e-07	1.213e-07	5.792e-07	1	0.25	0.5	0.583333	0.381881	0.129535
tr|Q1VEL6|Q1VEL6_VIBAL	Aspartate-semialdehyde dehydrogenase OS=Vibrio alginolyticus 12G01 GN=asd PE=3 SV=1	337	37360.9		17	6	26.1	4	3	3	4	1	1	3.33333	2	2.928e-07	9.14e-08	2.026e-07	2.056e-07	6.949e-08	6.942e-08	1	0.333333	0.333333	0.555556	0.3849	0.256714
tr|Q1VEM6|Q1VEM6_VIBAL	Chorismate synthase OS=Vibrio alginolyticus 12G01 GN=aroC PE=3 SV=1	361	39147.9		17	9	21.6	2	3	3	2	0	1	2.66667	1	2.218e-08	3.486e-08	5.671e-08	1.884e-08	0	1.82e-08	1	0	0.333333	0.444444	0.509175	0.206168
tr|Q1V9J0|Q1V9J0_VIBAL	Aspartate carbamoyltransferase OS=Vibrio alginolyticus 12G01 GN=pyrB PE=3 SV=1	309	34418.6		17	5	19.4	3	3	4	4	1	2	3.33333	2.33333	1.51e-07	1.01e-07	1.703e-07	8.539e-08	1.325e-07	7.956e-08	1.33333	0.333333	0.5	0.722222	0.535758	0.404578
tr|Q1V4Y9|Q1V4Y9_VIBAL	Peptide ABC transporter, periplasmic peptide-binding protein OS=Vibrio alginolyticus 12G01 GN=V12G01_21688 PE=4 SV=1	560	63015.2		17	7	13.8	3	6	4	2	0	1	4.33333	1	4.541e-08	5.379e-08	7.354e-08	9.102e-09	0	9.783e-09	0.666667	0	0.25	0.305556	0.336788	0.0773603
tr|Q1VFR2|Q1VFR2_VIBAL	Flagellar motor switch protein OS=Vibrio alginolyticus 12G01 GN=V12G01_05166 PE=4 SV=1	123	13424.6		17	5	45.5	2	4	3	1	1	4	3	2	4.197e-07	3.819e-07	2.724e-07	2.885e-08	1.249e-07	2.684e-07	0.5	0.25	1.33333	0.694444	0.567238	0.0954772
tr|Q1VAA0|Q1VAA0_VIBAL	Malate synthase OS=Vibrio alginolyticus 12G01 GN=V12G01_13080 PE=3 SV=1	542	61368		17	6	12.5	2	2	3	1	0	1	2.33333	0.666667	4.52e-08	1.839e-08	4.247e-08	2.487e-08	0	3.685e-08	0.5	0	0.333333	0.277778	0.254588	0.399205
tr|Q1VG05|Q1VG05_VIBAL	Pyridoxamine kinase OS=Vibrio alginolyticus 12G01 GN=pdxY PE=3 SV=1	289	31577.7		17	4	15.6	3	3	3	3	2	3	3	2.66667	8.062e-07	2.155e-07	5.11e-07	1.626e-07	3.506e-07	3.266e-07	1	0.666667	1	0.888889	0.19245	0.158733
tr|Q1VAW3|Q1VAW3_VIBAL	Universal stress protein OS=Vibrio alginolyticus 12G01 GN=V12G01_10838 PE=3 SV=1	141	15677.9		17	2	8.5	4	3	4	2	1	3	3.66667	2	1.111e-06	9.783e-07	1.436e-06	3.271e-07	5.095e-07	7.094e-07	0.5	0.333333	0.75	0.527778	0.209718	0.0575005
tr|Q1V605|Q1V605_VIBAL	Transcriptional regulator for cysteine regulon OS=Vibrio alginolyticus 12G01 GN=cysB PE=4 SV=1	324	36060.6		17	7	23.1	2	5	3	1	0	2	3.33333	1	9.021e-08	2.932e-07	1.321e-07	8.356e-09	0	7e-08	0.5	0	0.666667	0.388889	0.346944	0.0454155
tr|Q1V4W1|Q1V4W1_VIBAL	DNA gyrase subunit B OS=Vibrio alginolyticus 12G01 GN=gyrB PE=3 SV=1	805	89670.3		17	14	20.4	7	2	3	0	4	0	4	1.33333	5.944e-08	1.659e-08	3.874e-08	0	2.366e-07	0	0	2	0	0.666667	1.1547	0.25302
tr|Q1VDI2|Q1VDI2_VIBAL	Acetoacetyl-CoA reductase OS=Vibrio alginolyticus 12G01 GN=V12G01_01860 PE=3 SV=1	246	26245.2		16	4	14.2	3	4	3	1	0	2	3.33333	1	1.925e-07	2.961e-07	3.224e-07	7.406e-08	0	1.113e-07	0.333333	0	0.666667	0.333333	0.333333	0.0503677
tr|Q1VBM6|Q1VBM6_VIBAL	Ferric aerobactin receptor OS=Vibrio alginolyticus 12G01 GN=V12G01_07898 PE=3 SV=1	723	79710.6		16	8	13.8	4	4	4	1	1	1	4	1	1.02e-07	4.837e-08	1.002e-07	1.489e-08	5.988e-09	1.329e-08	0.25	0.25	0.25	0.25	0	0.0704357
tr|Q1V334|Q1V334_VIBAL	Agglutination protein (Fragment) OS=Vibrio alginolyticus 12G01 GN=V12G01_17912 PE=4 SV=1	364	40316.2		16	8	28.3	1	2	1	1	0	1	1.33333	0.666667	2.666e-08	4.16e-08	4.094e-08	1.102e-08	0	2.431e-08	1	0	1	0.666667	0.57735	0.208234
tr|Q1VBV4|Q1VBV4_VIBAL	Uncharacterized protein OS=Vibrio alginolyticus 12G01 GN=V12G01_07508 PE=4 SV=1	151	17101.7		16	5	29.1	3	4	2	2	2	3	3	2.33333	2.709e-07	2.95e-07	1.279e-07	5.922e-08	7.683e-08	6.988e-07	0.666667	0.5	1.5	0.888889	0.535758	0.524289
tr|Q1VBY6|Q1VBY6_VIBAL	Putative outer membrane protein OS=Vibrio alginolyticus 12G01 GN=V12G01_17902 PE=3 SV=1	204	23008.5		16	8	42.6	5	3	5	1	0	2	4.33333	1	2.907e-07	2.328e-07	1.623e-07	1.272e-08	0	2.004e-07	0.2	0	0.4	0.2	0.2	0.0848289
tr|Q1V372|Q1V372_VIBAL	50S ribosomal protein L15 OS=Vibrio alginolyticus 12G01 GN=rplO PE=3 SV=1	144	14863.3		16	5	29.2	3	1	2	3	4	3	2	3.33333	1.058e-06	1.016e-07	4.427e-07	4.369e-07	2.1e-06	6.559e-07	1	4	1.5	2.16667	1.60728	0.08417
tr|Q1VBS8|Q1VBS8_VIBAL	L-allo-threonine aldolase OS=Vibrio alginolyticus 12G01 GN=V12G01_07638 PE=4 SV=1	334	36153.6		16	5	22.8	0	1	3	2	0	0	1.33333	0.666667	0	8.868e-09	9.661e-08	1.732e-08	0	0		0	0	0	0	0.131333
tr|Q1V7F0|Q1V7F0_VIBAL	Putative peptidase OS=Vibrio alginolyticus 12G01 GN=V12G01_03711 PE=3 SV=1	615	69664.1		16	7	13	3	5	4	1	0	2	4	1	2.131e-08	9.264e-08	7.624e-08	2.922e-08	0	1.524e-08	0.333333	0	0.5	0.277778	0.254588	0.127129
tr|Q1V3K1|Q1V3K1_VIBAL	tRNA-2-methylthio-N(6)-dimethylallyladenosine synthase OS=Vibrio alginolyticus 12G01 GN=miaB PE=3 SV=1	474	53751.1		16	8	19	2	5	3	2	1	2	3.33333	1.66667	6.824e-08	2.267e-07	1.196e-07	4.507e-08	1.813e-08	9.404e-08	1	0.2	0.666667	0.622222	0.401848	0.147681
tr|Q1V897|Q1V897_VIBAL	Branched-chain amino acid aminotransferase OS=Vibrio alginolyticus 12G01 GN=V12G01_10276 PE=3 SV=1	312	34239.3		16	7	25.3	2	2	3	1	0	2	2.33333	1	6.308e-08	8.154e-08	1.909e-07	4.031e-08	0	1.025e-07	0.5	0	0.666667	0.388889	0.346944	0.185713
tr|Q1V8A2|Q1V8A2_VIBAL	Putative cyclohexadienyl dehydratase signal peptide protein OS=Vibrio alginolyticus 12G01 GN=V12G01_10251 PE=3 SV=1	258	28847.2		16	6	29.8	4	4	2	3	0	3	3.33333	2	1.887e-07	4.014e-07	1.538e-07	1.212e-07	0	1.161e-07	0.75	0	1.5	0.75	0.75	0.0845781
tr|Q1V8R9|Q1V8R9_VIBAL	Lactonizing lipase OS=Vibrio alginolyticus 12G01 GN=V12G01_19976 PE=4 SV=1	301	31821.1		16	3	16.6	4	3	3	3	1	2	3.33333	2	5.945e-07	2.162e-07	2.333e-07	1.128e-07	1.094e-07	3.189e-07	0.75	0.333333	0.666667	0.583333	0.220479	0.164387
tr|Q1VF38|Q1VF38_VIBAL	Na(+)-translocating NADH-quinone reductase subunit A OS=Vibrio alginolyticus 12G01 GN=nqrA PE=3 SV=1	446	48676		16	7	22.2	3	3	3	2	0	3	3	1.66667	9.183e-08	1.107e-07	9.426e-08	2.91e-08	0	9.147e-08	0.666667	0	1	0.555556	0.509175	0.182325
tr|Q1V4W4|Q1V4W4_VIBAL	16 kDa heat shock protein A OS=Vibrio alginolyticus 12G01 GN=V12G01_10081 PE=3 SV=1	145	16551.3		16	4	34.5	1	2	2	1	0	2	1.66667	1	3.65e-08	8.556e-08	2.451e-07	9.224e-08	0	9.782e-08	1	0	1	0.666667	0.57735	0.240527
tr|Q1V5M6|Q1V5M6_VIBAL	Lipoprotein NlpD OS=Vibrio alginolyticus 12G01 GN=V12G01_13724 PE=4 SV=1	307	33702		16	6	18.2	3	4	2	4	0	1	3	1.66667	6.864e-08	6.954e-08	3.988e-08	4.576e-08	0	1.943e-08	1.33333	0	0.5	0.611111	0.673575	0.19631
tr|Q1V6F9|Q1V6F9_VIBAL	Phosphoenolpyruvate carboxylase OS=Vibrio alginolyticus 12G01 GN=ppc PE=3 SV=1	877	99433		16	10	10.8	0	3	2	2	2	3	1.66667	2.33333	0	2.06e-08	2.948e-08	4.339e-08	2.012e-08	3.357e-08		0.666667	1.5	1.08333	0.589256	0.361552
tr|Q1V6K3|Q1V6K3_VIBAL	Uncharacterized protein OS=Vibrio alginolyticus 12G01 GN=V12G01_16547 PE=4 SV=1	99	11354.6		16	4	43.4	1	4	2	2	2	4	2.33333	2.66667	2.215e-07	7.054e-07	2.661e-07	1.739e-07	5.557e-07	8.967e-07	2	0.5	2	1.5	0.866025	0.333186
tr|Q1V2X8|Q1V2X8_VIBAL	Threonyl-tRNA synthetase (Fragment) OS=Vibrio alginolyticus 12G01 GN=V12G01_19541 PE=3 SV=1	208	23849.2		15	4	16.8	3	2	3	2	1	1	2.66667	1.33333	3.202e-07	1.944e-07	5.555e-07	1.808e-07	1.657e-07	1.443e-07	0.666667	0.5	0.333333	0.5	0.166667	0.129662
tr|Q1VBU0|Q1VBU0_VIBAL	Putative ClpA/B-type chaperone OS=Vibrio alginolyticus 12G01 GN=V12G01_07578 PE=4 SV=1	855	94102.8		15	9	10.8	3	2	1	0	1	2	2	1	2.614e-08	1.488e-08	1.029e-08	0	1.113e-08	1.981e-08	0	0.5	2	0.833333	1.04083	0.471498
tr|Q1V351|Q1V351_VIBAL	ATP-dependent Clp protease, ATP-binding subunit ClpA OS=Vibrio alginolyticus 12G01 GN=V12G01_20733 PE=4 SV=1	450	50580.5		15	8	18.7	3	3	0	0	3	4	2	2.33333	5.604e-08	5.946e-08	0	0	1.695e-07	8.36e-08	0	1		0.5	0.707107	0.228251
tr|Q1V443|Q1V443_VIBAL	Nicotinate-nucleotide pyrophosphorylase OS=Vibrio alginolyticus 12G01 GN=V12G01_21503 PE=3 SV=1	295	32244.4		15	5	12.2	3	3	2	3	0	1	2.66667	1.33333	8.888e-08	6.981e-08	4.129e-08	3.388e-08	0	2.266e-08	1	0	0.5	0.5	0.5	0.147078
tr|Q1VD22|Q1VD22_VIBAL	Uncharacterized protein OS=Vibrio alginolyticus 12G01 GN=V12G01_02660 PE=4 SV=1	64	7398.7		15	3	54.7	2	3	2	2	1	2	2.33333	1.66667	1.841e-07	8.943e-07	4.808e-07	4.518e-07	1.784e-07	5.581e-07	1	0.333333	1	0.777778	0.3849	0.365866
tr|Q1VDB0|Q1VDB0_VIBAL	Putative DamX-related protein OS=Vibrio alginolyticus 12G01 GN=V12G01_02220 PE=4 SV=1	135	15638.9		15	4	34.8	4	4	2	2	0	3	3.33333	1.66667	4.755e-07	5.946e-07	2.428e-07	7.814e-08	0	2.115e-07	0.5	0	1.5	0.666667	0.763763	0.0331222
tr|Q1V8M1|Q1V8M1_VIBAL	tRNA-specific 2-thiouridylase MnmA OS=Vibrio alginolyticus 12G01 GN=mnmA PE=3 SV=1	374	42242.1		15	9	30.5	2	3	4	1	0	0	3	0.333333	8.243e-08	9.877e-08	8.814e-08	1.231e-08	0	0	0.5	0	0	0.166667	0.288675	0.0390988
tr|Q1VAQ8|Q1VAQ8_VIBAL	Heat shock protein 15 OS=Vibrio alginolyticus 12G01 GN=V12G01_11113 PE=3 SV=1	128	15013		15	4	26.6	0	0	1	0	0	1	0.333333	0.333333	0	0	8.36e-09	0	0	4.744e-09			1	1		0.555936
tr|Q1V8T6|Q1V8T6_VIBAL	Ferric uptake regulator OS=Vibrio alginolyticus 12G01 GN=fur PE=4 SV=1	149	16811.4		15	4	34.2	3	3	2	1	2	4	2.66667	2.33333	7.908e-07	7.109e-07	3.267e-07	3.079e-07	8.344e-08	7.549e-07	0.333333	0.666667	2	1	0.881917	0.202687
tr|Q1V9B8|Q1V9B8_VIBAL	UvrABC system protein A OS=Vibrio alginolyticus 12G01 GN=uvrA PE=3 SV=1	940	104129		15	9	11	4	3	2	1	1	1	3	1	2.433e-08	1.97e-08	1.217e-08	2.974e-09	9.136e-09	2.357e-09	0.25	0.333333	0.5	0.361111	0.127294	0.218533
tr|Q1V4W8|Q1V4W8_VIBAL	Glycine--tRNA ligase alpha subunit OS=Vibrio alginolyticus 12G01 GN=glyQ PE=3 SV=1	305	35011.3		15	3	11.1	1	4	2	3	2	3	2.33333	2.66667	4.972e-08	2.708e-07	2.037e-07	1.505e-07	3.86e-07	2.999e-07	3	0.5	1.5	1.66667	1.25831	0.268336
tr|Q1VFA7|Q1VFA7_VIBAL	Dihydroorotase OS=Vibrio alginolyticus 12G01 GN=pyrC PE=3 SV=1	342	37851.2		15	7	33.9	6	3	2	2	0	1	3.66667	1	2.316e-07	5.782e-08	1.493e-07	2.732e-08	0	1.534e-08	0.333333	0	0.5	0.277778	0.254588	0.0369564
tr|Q1VG84|Q1VG84_VIBAL	Uncharacterized protein OS=Vibrio alginolyticus 12G01 GN=V12G01_04306 PE=4 SV=1	333	37475.5		15	8	24.3	3	3	3	2	0	3	3	1.66667	1.973e-07	1.411e-07	1.675e-07	2.777e-08	0	7.153e-08	0.666667	0	1	0.555556	0.509175	0.0596769
tr|Q1VG94|Q1VG94_VIBAL	Uncharacterized protein OS=Vibrio alginolyticus 12G01 GN=V12G01_04256 PE=4 SV=1	235	25491.9		15	5	40	4	3	3	0	2	3	3.33333	1.66667	1.666e-07	9.596e-08	2.91e-07	0	2.207e-07	1.692e-07	0	0.666667	1	0.555556	0.509175	0.380536
tr|Q1V5V8|Q1V5V8_VIBAL	Chorismate mutase/prephenate dehydratase OS=Vibrio alginolyticus 12G01 GN=V12G01_13229 PE=4 SV=1	392	44323		15	5	17.3	4	3	2	1	1	3	3	1.66667	1.945e-07	1.918e-07	8.643e-08	1.293e-07	3.928e-08	8.78e-08	0.25	0.333333	1.5	0.694444	0.698875	0.238181
tr|Q1VBV3|Q1VBV3_VIBAL	Uncharacterized protein OS=Vibrio alginolyticus 12G01 GN=V12G01_07513 PE=4 SV=1	429	48306.6		14	9	22.1	5	3	2	2	1	1	3.33333	1.33333	2.434e-07	1.145e-07	4.912e-08	3.744e-08	5.243e-08	5.441e-08	0.4	0.333333	0.5	0.411111	0.083887	0.136854
tr|Q1V754|Q1V754_VIBAL	4-hydroxy-tetrahydrodipicolinate reductase OS=Vibrio alginolyticus 12G01 GN=dapB PE=3 SV=1	269	28560.5		14	3	15.6	3	2	2	3	0	3	2.33333	2	3.019e-07	1.633e-07	3.082e-07	2.447e-07	0	2.524e-07	1	0	1.5	0.833333	0.763763	0.286338
tr|Q1VCH3|Q1VCH3_VIBAL	Uncharacterized protein OS=Vibrio alginolyticus 12G01 GN=V12G01_16967 PE=4 SV=1	169	19198.8		14	6	33.1	3	5	3	1	0	0	3.66667	0.333333	2.724e-07	4.425e-07	2.269e-07	6.211e-08	0	0	0.333333	0	0	0.111111	0.19245	0.0139214
tr|Q1V7I6|Q1V7I6_VIBAL	Cell division protein ZapB OS=Vibrio alginolyticus 12G01 GN=zapB PE=3 SV=1	80	9409.74		14	7	85	4	2	2	1	0	3	2.66667	1.33333	1.172e-06	1.378e-07	1.139e-06	4.762e-08	0	2.574e-07	0.25	0	1.5	0.583333	0.803638	0.0088204
tr|Q1V8C4|Q1V8C4_VIBAL	PhnA protein OS=Vibrio alginolyticus 12G01 GN=V12G01_08655 PE=4 SV=1	185	20566.9		14	5	25.9	3	2	2	3	1	3	2.33333	2.33333	2.361e-07	1.233e-07	2.511e-07	1.455e-07	2.309e-07	3.052e-07	1	0.5	1.5	1	0.5	0.615549
tr|Q1V449|Q1V449_VIBAL	ATP-dependent Clp protease proteolytic subunit OS=Vibrio alginolyticus 12G01 GN=clpP PE=3 SV=1	208	23080.5		14	4	27.4	3	3	2	2	0	3	2.66667	1.66667	2.934e-06	2.052e-06	1.59e-06	3.456e-07	0	1.514e-06	0.666667	0	1.5	0.722222	0.751542	0.0110521
tr|Q1V8Z4|Q1V8Z4_VIBAL	Flagellar basal-body rod protein C OS=Vibrio alginolyticus 12G01 GN=flgC PE=4 SV=1	137	14853.2		14	3	32.8	2	2	2	2	2	3	2	2.33333	3.095e-07	2.266e-07	3.125e-07	2.625e-07	2.791e-07	2.643e-07	1	1	1.5	1.16667	0.288675	0.654589
tr|Q1V5F7|Q1V5F7_VIBAL	UPF0234 protein V12G01_18002 OS=Vibrio alginolyticus 12G01 GN=V12G01_18002 PE=3 SV=1	160	18205.3		14	5	37.5	2	4	2	1	2	2	2.66667	1.66667	1.552e-07	1.617e-07	1.32e-07	5.231e-08	1.244e-07	1.439e-07	0.5	0.5	1	0.666667	0.288675	0.408191
tr|Q1V5J8|Q1V5J8_VIBAL	tRNA-modifying protein YgfZ OS=Vibrio alginolyticus 12G01 GN=V12G01_13864 PE=3 SV=1	322	35502.8		14	6	28.9	6	3	0	1	2	1	3	1.33333	3.299e-07	1.214e-07	0	6.612e-08	7.19e-08	5.052e-08	0.166667	0.666667		0.416667	0.353553	0.161777
tr|Q1VGE6|Q1VGE6_VIBAL	Uncharacterized protein OS=Vibrio alginolyticus 12G01 GN=V12G01_03996 PE=4 SV=1	264	30402.5		14	4	14	1	3	3	2	2	2	2.33333	2	3.832e-08	6.626e-08	6.35e-08	5.036e-07	7.878e-07	6.943e-07	2	0.666667	0.666667	1.11111	0.7698	0.00658023
tr|Q1VB21|Q1VB21_VIBAL	Uncharacterized protein OS=Vibrio alginolyticus 12G01 GN=V12G01_01630 PE=4 SV=1	108	12053.7		14	4	37	2	3	4	2	0	2	3	1.33333	1.69e-07	2.359e-07	9.285e-07	7.469e-08	0	2.269e-07	1	0	0.5	0.5	0.5	0.0335813
tr|Q1V6B2|Q1V6B2_VIBAL	Ribonuclease E OS=Vibrio alginolyticus 12G01 GN=rne PE=3 SV=1	1021	114735		14	15	12.3	1	1	2	2	3	2	1.33333	2.33333	1.469e-09	2.708e-09	1.458e-08	1.125e-08	8.011e-08	8.69e-09	2	3	1	2	1	0.14247
tr|Q1VBN6|Q1VBN6_VIBAL	Nucleoside diphosphate kinase regulator OS=Vibrio alginolyticus 12G01 GN=V12G01_07848 PE=4 SV=1	135	15051.5		13	4	32.6	3	3	3	2	0	1	3	1	3.128e-07	3.016e-07	4.606e-07	2.013e-07	0	1.509e-07	0.666667	0	0.333333	0.333333	0.333333	0.0704102
tr|Q1VBU4|Q1VBU4_VIBAL	Uncharacterized protein OS=Vibrio alginolyticus 12G01 GN=V12G01_07558 PE=4 SV=1	264	29552		13	4	18.6	4	3	4	1	0	1	3.66667	0.666667	2.635e-07	9.011e-08	2.24e-07	3.695e-08	0	7.473e-08	0.25	0	0.25	0.166667	0.144338	0.0538533
tr|Q1V756|Q1V756_VIBAL	Carbamoyl-phosphate synthase large chain OS=Vibrio alginolyticus 12G01 GN=carB PE=3 SV=1	1077	118042		13	17	15.3	3	0	0	1	5	1	1	2.33333	3.743e-08	0	0	2.804e-09	5.12e-07	7.475e-09	0.333333			0.333333		0.022848
tr|Q1VC26|Q1VC26_VIBAL	Citrate synthase OS=Vibrio alginolyticus 12G01 GN=prpC PE=3 SV=1	380	42520.1		13	8	25	3	3	7	0	0	0	4.33333	0	6.049e-08	4.998e-08	2.016e-07	0	0	0	0	0	0	0	0	0.0221084
tr|Q1V364|Q1V364_VIBAL	50S ribosomal protein L25 OS=Vibrio alginolyticus 12G01 GN=rplY PE=3 SV=1	92	10425.5		13	3	27.2	2	2	2	3	2	2	2	2.33333	7.294e-07	7.953e-07	7.855e-07	9.377e-07	1.327e-06	4.909e-07	1.5	1	1	1.16667	0.288675	0.450563
tr|Q1V367|Q1V367_VIBAL	DNA-binding response regulator OS=Vibrio alginolyticus 12G01 GN=V12G01_19866 PE=4 SV=1	219	24648		13	4	24.2	2	3	3	1	0	1	2.66667	0.666667	3.421e-07	4.877e-07	3.483e-07	8.631e-08	0	1.154e-07	0.5	0	0.333333	0.277778	0.254588	0.025543
tr|Q1V7D7|Q1V7D7_VIBAL	Spindolin-related protein OS=Vibrio alginolyticus 12G01 GN=V12G01_03776 PE=4 SV=1	392	43639		13	4	11	4	2	1	3	1	2	2.33333	2	2.691e-07	1.494e-07	1.571e-07	2.462e-07	2.746e-08	1.421e-07	0.75	0.5	2	1.08333	0.803638	0.398963
tr|Q1V7M0|Q1V7M0_VIBAL	Uncharacterized protein OS=Vibrio alginolyticus 12G01 GN=V12G01_11538 PE=4 SV=1	165	17676.7		13	3	20.6	2	2	2	3	1	2	2	2	2.831e-07	1.989e-07	3.433e-07	2.88e-07	1.523e-07	1.442e-07	1.5	0.5	1	1	0.5	0.35084
tr|Q1V3K6|Q1V3K6_VIBAL	Uncharacterized protein OS=Vibrio alginolyticus 12G01 GN=V12G01_00160 PE=4 SV=1	156	17574.8		13	5	29.5	3	4	2	1	1	2	3	1.33333	2.458e-07	7.19e-07	1.591e-07	1.483e-08	2.145e-08	6.851e-07	0.333333	0.25	1	0.527778	0.411074	0.252999
tr|Q1VDA0|Q1VDA0_VIBAL	Alkaline serine protease OS=Vibrio alginolyticus 12G01 GN=V12G01_02270 PE=3 SV=1	534	56070		13	4	11.6	3	2	3	2	1	1	2.66667	1.33333	1.053e-07	6.561e-08	8.288e-08	4.468e-08	1.365e-08	2.146e-08	0.666667	0.5	0.333333	0.5	0.166667	0.14718
tr|Q1V3V9|Q1V3V9_VIBAL	Phosphoribosylamine--glycine ligase OS=Vibrio alginolyticus 12G01 GN=purD PE=3 SV=1	429	45819.1		13	4	20.7	3	5	4	1	0	0	4	0.333333	2.554e-07	1.138e-07	7.43e-08	1.236e-08	0	0	0.333333	0	0	0.111111	0.19245	0.0215005
tr|Q1VA46|Q1VA46_VIBAL	Transcription-repair-coupling factor OS=Vibrio alginolyticus 12G01 GN=mfd PE=3 SV=1	1153	130663		13	14	11.3	0	1	0.99	0	0	0	0.663333	0	0	1.202e-09	5.638e-09	0	0	0		0	0	0	0	0.289271
tr|Q1VEM9|Q1VEM9_VIBAL	Phosphohistidine phosphatase OS=Vibrio alginolyticus 12G01 GN=V12G01_23028 PE=4 SV=1	154	17446.6		13	3	20.8	3	2	2	3	1	2	2.33333	2	1.9e-07	1.372e-07	3.151e-07	1.037e-07	6.256e-08	1.733e-07	1	0.5	1	0.833333	0.288675	0.204837
tr|Q1VF02|Q1VF02_VIBAL	Uncharacterized protein OS=Vibrio alginolyticus 12G01 GN=V12G01_22413 PE=4 SV=1	345	39249.4		13	8	26.4	2	3	5	1	0	1	3.33333	0.666667	2.884e-08	2.776e-07	1.883e-07	2.109e-08	0	3.769e-08	0.5	0	0.2	0.233333	0.251661	0.0390733
tr|Q1V4V9|Q1V4V9_VIBAL	DNA polymerase III subunit beta OS=Vibrio alginolyticus 12G01 GN=V12G01_10106 PE=3 SV=1	366	40766.8		13	3	7.4	2	3	4	2	0	2	3	1.33333	7.857e-08	6.604e-08	9.702e-08	1.817e-08	0	1.409e-08	1	0	0.5	0.5	0.5	0.0711243
tr|Q1VF95|Q1VF95_VIBAL	Uncharacterized protein OS=Vibrio alginolyticus 12G01 GN=V12G01_06001 PE=4 SV=1	99	11042.5		13	3	33.3	2	2	3	2	1	3	2.33333	2	2.861e-07	3.193e-07	4.466e-07	2.017e-07	1.655e-07	2.719e-07	1	0.5	1	0.833333	0.288675	0.229165
tr|Q1VA60|Q1VA60_VIBAL	UPF0304 protein V12G01_20853 OS=Vibrio alginolyticus 12G01 GN=V12G01_20853 PE=3 SV=1	166	19889.5		13	6	32.5	3	3	2	2	0	2	2.66667	1.33333	4.662e-07	2.801e-07	3.092e-07	1.286e-07	0	1.111e-07	0.666667	0	1	0.555556	0.509175	0.0409989
tr|Q1VAJ7|Q1VAJ7_VIBAL	N utilization substance protein B homolog OS=Vibrio alginolyticus 12G01 GN=nusB PE=3 SV=1	155	17631.1		13	7	54.8	4	4	2	0	1	0	3.33333	0.333333	4.556e-07	7.562e-07	1.476e-07	0	1.925e-08	0	0	0.25	0	0.0833333	0.144338	0.00634644
tr|Q1VG67|Q1VG67_VIBAL	DNA gyrase inhibitor OS=Vibrio alginolyticus 12G01 GN=V12G01_04391 PE=4 SV=1	299	34224.7		13	2	10.4	2	3	2	2	0	2	2.33333	1.33333	9.373e-08	8.128e-08	8.843e-08	3.088e-08	0	1.18e-07	1	0	1	0.666667	0.57735	0.305934
tr|Q1VAY7|Q1VAY7_VIBAL	Uncharacterized protein OS=Vibrio alginolyticus 12G01 GN=V12G01_10718 PE=4 SV=1	773	84832.2		13	10	18	3	4	1	5	0	0	2.66667	1.66667	6.569e-08	6.381e-08	1.174e-08	1.177e-07	0	0	1.66667	0	0	0.555556	0.96225	0.596319
tr|Q1V624|Q1V624_VIBAL	Uncharacterized protein OS=Vibrio alginolyticus 12G01 GN=V12G01_09747 PE=4 SV=1	517	57513.3		13	7	18.6	3	2	3	2	0	3	2.66667	1.66667	9.942e-08	8.145e-08	1.04e-07	4.952e-08	0	4.496e-08	0.666667	0	1	0.555556	0.509175	0.148438
tr|Q1V3P5|Q1V3P5_VIBAL	Cold shock transcriptional regulator CspA OS=Vibrio alginolyticus 12G01 GN=V12G01_06801 PE=3 SV=1	70	7627.84		13	5	77.1	2.99	2.99	1.99	1.99	0	1.99	2.65667	1.32667	1.008e-06	1.156e-06	1.681e-06	4.243e-07	0	7.072e-07	0.665552	0	1	0.555184	0.509054	0.0207056
tr|Q1VBM0|Q1VBM0_VIBAL	3-oxoacyl-[acyl-carrier-protein] synthase 3 OS=Vibrio alginolyticus 12G01 GN=fabH PE=3 SV=1	364	39491		12	5	16.5	3	1	3	2	0	2	2.33333	1.33333	1.284e-07	5.78e-08	1.16e-07	1.214e-07	0	8.626e-08	0.666667	0	0.666667	0.444444	0.3849	0.41095
tr|Q1VBR4|Q1VBR4_VIBAL	Uncharacterized protein OS=Vibrio alginolyticus 12G01 GN=V12G01_07708 PE=4 SV=1	105	12121		12	4	42.9	3	1	2	2	2	1	2	1.66667	9.882e-07	1.05e-08	7.814e-07	4.581e-07	4.71e-07	1.762e-08	0.666667	2	0.5	1.05556	0.822147	0.139889
tr|Q1V6W3|Q1V6W3_VIBAL	Putative methyltransferase OS=Vibrio alginolyticus 12G01 GN=V12G01_06716 PE=4 SV=1	191	21057.5		12	3	23	1	3	2	0	1	1	2	0.666667	3.284e-08	2.903e-07	1.059e-07	0	1.738e-07	1.005e-07	0	0.333333	0.5	0.277778	0.254588	0.335082
tr|Q1V7A3|Q1V7A3_VIBAL	Oxidoreductase Tas, aldo/keto reductase family protein OS=Vibrio alginolyticus 12G01 GN=V12G01_13414 PE=4 SV=1	344	38742.6		12	3	9	3	2	3	2	0	2	2.66667	1.33333	1.27e-07	3.866e-08	3.563e-07	5.401e-08	0	1.005e-07	0.666667	0	0.666667	0.444444	0.3849	0.0942274
tr|Q1V7J8|Q1V7J8_VIBAL	Glycosyl transferase group 1 OS=Vibrio alginolyticus 12G01 GN=V12G01_11648 PE=4 SV=1	358	39722.4		12	5	15.6	4	2	3	1	0	1	3	0.666667	1.563e-07	8.363e-08	1.459e-07	2.898e-08	0	8.676e-08	0.25	0	0.333333	0.194444	0.173472	0.114053
tr|Q1V3D8|Q1V3D8_VIBAL	DnaK suppressor protein (Fragment) OS=Vibrio alginolyticus 12G01 GN=V12G01_21598 PE=4 SV=1	121	14047		12	4	58.7	1	2	2	3	1	1	1.66667	1.66667	3.923e-07	4.463e-07	3.22e-07	1.681e-07	9.065e-08	1.211e-07	3	0.5	0.5	1.33333	1.44338	0.0673369
tr|Q1V7T2|Q1V7T2_VIBAL	NifS-related protein OS=Vibrio alginolyticus 12G01 GN=V12G01_19681 PE=3 SV=1	411	45695.7		12	6	14.8	3	2	5	1	0	1	3.33333	0.666667	1.615e-07	1.196e-07	1.664e-07	3.776e-08	0	7.903e-08	0.333333	0	0.2	0.177778	0.167774	0.08783
tr|Q1VAD4|Q1VAD4_VIBAL	Putative chitinase OS=Vibrio alginolyticus 12G01 GN=V12G01_12910 PE=4 SV=1	560	62182.8		12	3	4.5	1	1	1	1	1	2	1	1.33333	2.805e-08	3.504e-08	4.245e-08	5.676e-09	1.375e-08	4.306e-08	1	1	2	1.33333	0.57735	0.406363
tr|Q1V801|Q1V801_VIBAL	Putative long-chain fatty acid transport protein OS=Vibrio alginolyticus 12G01 GN=V12G01_06246 PE=4 SV=1	361	39331.7		12	3	11.1	2	2	2	3	1	2	2	2	1.018e-07	9.053e-08	1.207e-07	1.715e-07	7.364e-08	1.064e-07	1.5	0.5	1	1	0.5	0.63316
tr|Q1VDB1|Q1VDB1_VIBAL	Putative antioxidant OS=Vibrio alginolyticus 12G01 GN=V12G01_02215 PE=4 SV=1	157	16632.4		12	4	44.6	0	2	1	1	0	1	1	0.666667	0	5.309e-07	8.938e-08	8.005e-08	0	9.23e-08		0	1	0.5	0.707107	0.077492
tr|Q1V8A7|Q1V8A7_VIBAL	ATP synthase gamma chain OS=Vibrio alginolyticus 12G01 GN=atpG PE=3 SV=1	288	31883.4		12	6	18.4	1	1	3	2	2	2	1.66667	2	5.474e-09	2.817e-08	1.215e-07	2.252e-08	1.259e-07	3.682e-08	2	2	0.666667	1.55556	0.7698	0.605479
tr|Q1VDL0|Q1VDL0_VIBAL	Hyopothetical protein OS=Vibrio alginolyticus 12G01 GN=V12G01_19487 PE=4 SV=1	263	30202.3		12	5	21.7	2	3	2	2	0	1	2.33333	1	9.776e-08	2.253e-07	8.841e-08	3.831e-08	0	6.387e-08	1	0	0.5	0.5	0.5	0.0874431
tr|Q1V427|Q1V427_VIBAL	3-methyl-2-oxobutanoate hydroxymethyltransferase OS=Vibrio alginolyticus 12G01 GN=V12G01_21583 PE=3 SV=1	206	22483.4		12	4	20.9	1	2	3	0	0	2	2	0.666667	8.986e-08	1.308e-07	1.841e-07	0	0	1.667e-07	0	0	0.666667	0.222222	0.3849	0.166257
tr|Q1V8Y3|Q1V8Y3_VIBAL	Flagellin OS=Vibrio alginolyticus 12G01 GN=V12G01_15490 PE=4 SV=1	377	40157		12	40	94.2	1	2	2	3	2	2	1.66667	2.33333	1.014e-07	2.999e-07	2.567e-07	1.503e-07	3.429e-07	5.934e-08	3	1	1	1.66667	1.1547	0.531192
tr|Q1V903|Q1V903_VIBAL	Uncharacterized protein OS=Vibrio alginolyticus 12G01 GN=V12G01_15390 PE=4 SV=1	377	42465.6		12	8	23.9	2	5	3	1	0	1	3.33333	0.666667	4.361e-08	1.116e-07	8.674e-08	2.383e-08	0	3.578e-08	0.5	0	0.333333	0.277778	0.254588	0.116893
tr|Q1V908|Q1V908_VIBAL	Putative chitoporin OS=Vibrio alginolyticus 12G01 GN=V12G01_15365 PE=4 SV=1	373	41107.5		12	4	17.7	2	2	3	3	1	0	2.33333	1.33333	1.779e-07	1.23e-07	9.048e-08	9.844e-08	4.772e-08	0	1.5	0.5	0	0.666667	0.763763	0.149067
tr|Q1VEV9|Q1VEV9_VIBAL	Phosphoribosylformylglycinamidine cyclo-ligase OS=Vibrio alginolyticus 12G01 GN=purM PE=3 SV=1	346	36958.6		12	7	26.3	2	2	2	1	0	0	2	0.333333	5.619e-08	8.087e-09	4.544e-08	3.248e-09	0	0	0.5	0	0	0.166667	0.288675	0.068187
tr|Q1V526|Q1V526_VIBAL	Lipoprotein NlpI OS=Vibrio alginolyticus 12G01 GN=V12G01_21833 PE=3 SV=1	306	35541.9		12	5	19.3	4	4	1	2	0	1	3	1	3.225e-07	2.038e-07	8.886e-08	3.881e-07	0	1.593e-07	0.5	0	1	0.5	0.5	0.593501
tr|Q1VAA9|Q1VAA9_VIBAL	Inositol monophosphate family protein OS=Vibrio alginolyticus 12G01 GN=V12G01_13035 PE=4 SV=1	267	29097		12	5	21.7	3	4	3	1	0	1	3.33333	0.666667	1.222e-07	5.702e-08	1.526e-07	6.891e-09	0	1.242e-08	0.333333	0	0.333333	0.222222	0.19245	0.0355749
tr|Q1V5N6|Q1V5N6_VIBAL	Putative lytic murein transglycosylase OS=Vibrio alginolyticus 12G01 GN=V12G01_00667 PE=4 SV=1	300	34284.2		12	4	12.7	2	3	3	3	0	1	2.66667	1.33333	1.538e-07	1.915e-07	3.311e-07	9.391e-08	0	6.699e-08	1.5	0	0.333333	0.611111	0.787636	0.0609904
tr|Q1V5Q8|Q1V5Q8_VIBAL	Hypothetical lipoprotein OS=Vibrio alginolyticus 12G01 GN=V12G01_00557 PE=4 SV=1	132	15037		12	5	43.9	1	4	2	2	2	0	2.33333	1.33333	1.155e-07	6.193e-07	3.097e-07	9.504e-08	2.595e-07	0	2	0.5	0	0.833333	1.04083	0.0754049
tr|Q1V5X7|Q1V5X7_VIBAL	Peptidoglycan-associated lipoprotein OS=Vibrio alginolyticus 12G01 GN=V12G01_20496 PE=3 SV=1	174	18719.4		12	2	15.5	4	5	2	1	0	0	3.66667	0.333333	2.544e-07	3.843e-07	1.854e-07	1.341e-07	0	0	0.25	0	0	0.0833333	0.144338	0.0336153
tr|Q1V6P7|Q1V6P7_VIBAL	Putative carboxynorspermidine dehydrogenase OS=Vibrio alginolyticus 12G01 GN=V12G01_16327 PE=4 SV=1	414	46156.8		12	5	20	3	3	1	3	1	1	2.33333	1.66667	4.604e-07	3.998e-07	2.641e-07	2.002e-07	8.789e-08	2.193e-07	1	0.333333	1	0.777778	0.3849	0.122491
tr|Q1VBJ8|Q1VBJ8_VIBAL	Uncharacterized protein OS=Vibrio alginolyticus 12G01 GN=V12G01_08038 PE=4 SV=1	65	7372.75		11	2	32.3	2	2	1	2	2	2	1.66667	2	9.349e-07	1.005e-06	2.034e-07	9.699e-07	3.101e-07	6.615e-07	1	1	2	1.33333	0.57735	0.565029
tr|Q1V337|Q1V337_VIBAL	tRNA uridine 5-carboxymethylaminomethyl modification enzyme MnmG OS=Vibrio alginolyticus 12G01 GN=mnmG PE=3 SV=1	631	70330		11	7	15.1	2	2	1	0	0	2	1.66667	0.666667	2.104e-08	2.226e-08	1.311e-08	0	0	1.47e-08	0	0	2	0.666667	1.1547	0.224944
tr|Q1V3X9|Q1V3X9_VIBAL	Uncharacterized protein OS=Vibrio alginolyticus 12G01 GN=V12G01_14049 PE=4 SV=1	143	16094.6		11	3	21.7	2	3	2	2	0	1	2.33333	1	5.084e-07	1.157e-06	6.325e-07	2.49e-07	0	2.996e-07	1	0	0.5	0.5	0.5	0.0226227
tr|Q1V5H9|Q1V5H9_VIBAL	Uncharacterized protein OS=Vibrio alginolyticus 12G01 GN=V12G01_09357 PE=4 SV=1	100	10636.5		11	2	19	1	3	2	3	0	2	2	1.66667	9.45e-08	1.915e-07	2.843e-07	2.56e-07	0	7.475e-08	3	0	1	1.33333	1.52753	0.253109
tr|Q1VD62|Q1VD62_VIBAL	Periplasmic L-asparaginase II OS=Vibrio alginolyticus 12G01 GN=V12G01_02460 PE=3 SV=1	354	38225.4		11	4	22.9	0	2	2	3	0	1	1.33333	1.33333	0	2.674e-08	6.556e-08	6.919e-08	0	3.85e-08		0	0.5	0.25	0.353553	0.63705
tr|Q1VDD2|Q1VDD2_VIBAL	3,4-dihydroxy-2-butanone 4-phosphate synthase OS=Vibrio alginolyticus 12G01 GN=ribB PE=3 SV=1	218	23618.9		11	4	21.1	2	1	2	2	0	1	1.66667	1	1.727e-07	1.004e-07	2.011e-07	1.236e-07	0	9.017e-08	1	0	0.5	0.5	0.5	0.176642
tr|Q1V3Q2|Q1V3Q2_VIBAL	Signal recognition particle protein OS=Vibrio alginolyticus 12G01 GN=ffh PE=3 SV=1	460	50435.3		11	10	24.8	5	0	2	1	0	0	2.33333	0.333333	3.098e-07	0	1.52e-08	3.575e-08	0	0	0.2		0	0.1	0.141421	0.050831
tr|Q1V8E0|Q1V8E0_VIBAL	Uncharacterized protein OS=Vibrio alginolyticus 12G01 GN=V12G01_08575 PE=4 SV=1	551	61594.4		11	6	8.9	2	3	2	1	1	2	2.33333	1.33333	2.136e-08	6.004e-08	3.843e-08	2.719e-09	2.217e-09	3.008e-08	0.5	0.333333	1	0.611111	0.346944	0.182738
tr|Q1VDL8|Q1VDL8_VIBAL	Phosphoribosylglycinamide formyltransferase 2 OS=Vibrio alginolyticus 12G01 GN=purT PE=3 SV=1	391	42786.8		11	5	15.1	2	3	1	2	0	3	2	1.66667	7.834e-08	7.982e-08	7.313e-08	3.416e-08	0	9.617e-08	1	0	3	1.33333	1.52753	0.316922
tr|Q1VE93|Q1VE93_VIBAL	Iron-sulfur cluster-binding protein OS=Vibrio alginolyticus 12G01 GN=V12G01_18322 PE=4 SV=1	553	60445		11	5	12.5	2	3	3	2	1	0	2.66667	1	5.759e-08	4.489e-08	5.781e-08	1.153e-08	5.724e-09	0	1	0.333333	0	0.444444	0.509175	0.0805143
tr|Q1VEE8|Q1VEE8_VIBAL	Putative nitroreductase OS=Vibrio alginolyticus 12G01 GN=V12G01_23433 PE=4 SV=1	182	19886.3		11	7	34.1	1	3	4	1	0	0	2.66667	0.333333	3.982e-08	2.636e-07	2.028e-07	2.021e-08	0	0	1	0	0	0.333333	0.57735	0.021322
tr|Q1VEV8|Q1VEV8_VIBAL	Uracil phosphoribosyltransferase OS=Vibrio alginolyticus 12G01 GN=upp PE=3 SV=1	208	22723		11	7	35.1	7	1	1	0	0	0	3	0	8.69e-07	6.124e-09	8.202e-09	0	0	0	0	0	0	0	0	0.00746015
tr|Q1V9B0|Q1V9B0_VIBAL	Exoribonuclease 2 OS=Vibrio alginolyticus 12G01 GN=rnb PE=3 SV=1	667	75357.4		11	8	18.3	4	2	3	1	0	1	3	0.666667	6.485e-08	5.832e-08	9.463e-08	5.363e-09	0	1.96e-08	0.25	0	0.333333	0.194444	0.173472	0.0688374
tr|Q1V9L3|Q1V9L3_VIBAL	Accessory colonization factor AcfA OS=Vibrio alginolyticus 12G01 GN=V12G01_09230 PE=4 SV=1	215	24198.7		11	3	19.5	2	4	1	1	2	1	2.33333	1.33333	1.866e-07	2.039e-07	2.946e-08	6.346e-08	1.695e-07	7.933e-08	0.5	0.5	1	0.666667	0.288675	0.44664
tr|Q1VFL6|Q1VFL6_VIBAL	ATP-dependent protease LA-related protein OS=Vibrio alginolyticus 12G01 GN=V12G01_05396 PE=4 SV=1	786	88406.1		11	11	17.8	1	0	0	4	0	0	0.333333	1.33333	3.588e-09	0	0	1.409e-07	0	0	4			4		0.050542
tr|Q1V5E8|Q1V5E8_VIBAL	Uncharacterized protein OS=Vibrio alginolyticus 12G01 GN=V12G01_18047 PE=4 SV=1	157	17268.6		11	6	51	1	2	2	1	0	1	1.66667	0.666667	3.173e-08	5.381e-08	4.691e-07	3.406e-08	0	1.939e-07	1	0	0.5	0.5	0.5	0.146368
tr|Q1VFZ5|Q1VFZ5_VIBAL	1,4-alpha-glucan branching enzyme GlgB OS=Vibrio alginolyticus 12G01 GN=glgB PE=3 SV=1	747	86599.3		11	8	14.3	2	2	4	2	0	1	2.66667	1	7.563e-08	3.455e-08	9.003e-08	2.945e-08	0	1.958e-08	1	0	0.25	0.416667	0.520416	0.128765
tr|Q1V7L9|Q1V7L9_VIBAL	OtnA protein OS=Vibrio alginolyticus 12G01 GN=V12G01_11543 PE=4 SV=1	900	99923.5		10	7	10.2	4	2	1	0	1	0	2.33333	0.333333	8.886e-08	3.942e-08	1.774e-08	0	7.113e-08	0	0	0.5	0	0.166667	0.288675	0.294563
tr|Q1V4R3|Q1V4R3_VIBAL	Glycerol-3-phosphate dehydrogenase [NAD(P)+] OS=Vibrio alginolyticus 12G01 GN=gpsA PE=3 SV=1	345	37121.9		10	4	14.5	2	0	1	2	0	1	1	1	9.358e-08	0	7.018e-08	9.882e-08	0	5.503e-08	1		1	1	0	0.668999
tr|Q1VET7|Q1VET7_VIBAL	TyrA protein OS=Vibrio alginolyticus 12G01 GN=V12G01_22738 PE=4 SV=1	300	33434.1		10	3	8.7	3	1	2	1	0	1	2	0.666667	2.799e-07	7.598e-08	1.26e-07	5.281e-08	0	5.867e-08	0.333333	0	0.5	0.277778	0.254588	0.0727991
tr|Q1V768|Q1V768_VIBAL	Glutamate synthase, large subunit OS=Vibrio alginolyticus 12G01 GN=V12G01_13589 PE=4 SV=1	1487	163528		10	7	6	1	1	1	1	0	1	1	0.666667	9.1e-09	7.65e-09	4.145e-09	2.934e-10	0	3.924e-09	1	0	1	0.666667	0.57735	0.271167
tr|Q1VCP9|Q1VCP9_VIBAL	L-serine dehydratase 1 OS=Vibrio alginolyticus 12G01 GN=V12G01_16587 PE=4 SV=1	453	49189.4		10	7	16.1	2	0	0	0	1	1	0.666667	0.666667	1.714e-08	0	0	0	6.001e-09	4.331e-09	0			0		0.530193
tr|Q1VC80|Q1VC80_VIBAL	Aldehyde dehydrogenase OS=Vibrio alginolyticus 12G01 GN=V12G01_17432 PE=3 SV=1	506	55924		10	2	6.3	2	1	1	1	0	2	1.33333	1	6.603e-08	3.613e-08	6.989e-08	1.222e-07	0	2.346e-07	0.5	0	2	0.833333	1.04083	0.219583
tr|Q1V3I7|Q1V3I7_VIBAL	Arginine repressor OS=Vibrio alginolyticus 12G01 GN=argR PE=3 SV=1	156	17021.9		10	6	41	0	4	3	0	1	0	2.33333	0.333333	0	3.475e-07	3.299e-07	0	1.737e-07	0		0.25	0	0.125	0.176777	0.0673369
tr|Q1V826|Q1V826_VIBAL	Hydroxypyruvate isomerase OS=Vibrio alginolyticus 12G01 GN=V12G01_06121 PE=3 SV=1	258	29457.7		10	6	24.8	1	1	4	0	0	0	2	0	1.297e-08	9.756e-09	1.268e-07	0	0	0	0	0	0	0	0	0.0419596
tr|Q1V847|Q1V847_VIBAL	Uncharacterized protein OS=Vibrio alginolyticus 12G01 GN=V12G01_10526 PE=4 SV=1	194	21140		10	4	25.8	4	2	1	1	1	1	2.33333	1	1.998e-07	1.26e-07	1.187e-07	3.171e-08	5.798e-08	3.974e-08	0.25	0.5	1	0.583333	0.381881	0.101237
tr|Q1V3K2|Q1V3K2_VIBAL	PhoH family protein OS=Vibrio alginolyticus 12G01 GN=V12G01_00180 PE=4 SV=1	365	41167.7		10	5	18.9	1	3	2	0	2	2	2	1.33333	4.218e-08	7.46e-08	7.427e-08	0	1.433e-07	1.081e-07	0	0.666667	1	0.555556	0.509175	0.514516
tr|Q1VE29|Q1VE29_VIBAL	DnaK-related protein OS=Vibrio alginolyticus 12G01 GN=V12G01_18642 PE=3 SV=1	653	71131.6		10	3	3.5	1	1	2	2	1	0	1.33333	1	1.401e-08	1.203e-08	3.113e-08	8.561e-09	1.291e-08	0	2	1	0	1	1	0.29498
tr|Q1V8F1|Q1V8F1_VIBAL	UDP-glucose 4-epimerase OS=Vibrio alginolyticus 12G01 GN=V12G01_08520 PE=3 SV=1	338	36874.3		10	5	22.2	3	3	2	2	0	0	2.66667	0.666667	5.776e-07	1.133e-07	2.192e-07	3.519e-08	0	0	0.666667	0	0	0.222222	0.3849	0.0115452
tr|Q1V3X2|Q1V3X2_VIBAL	Probable Fe(2+)-trafficking protein OS=Vibrio alginolyticus 12G01 GN=V12G01_14084 PE=3 SV=1	90	10640.3		10	3	38.9	2	2	4	1	0	1	2.66667	0.666667	9.24e-07	3.02e-07	9.191e-07	2.834e-07	0	2.45e-07	0.5	0	0.25	0.25	0.25	0.0249394
tr|Q1VEI9|Q1VEI9_VIBAL	Acetyltransferase, possible OS=Vibrio alginolyticus 12G01 GN=V12G01_23228 PE=4 SV=1	149	17127.7		10	2	9.4	0	0	0	1	1	0	0	0.666667	0	0	0	1.441e-07	4.299e-06	0						0.00171307
tr|Q1V8Z5|Q1V8Z5_VIBAL	Flagellar basal body rod protein FlgB OS=Vibrio alginolyticus 12G01 GN=flgB PE=3 SV=1	131	14248.4		10	4	43.5	1	0	2	3	0	3	1	2	7.186e-08	0	1.869e-07	2.826e-07	0	3.07e-07	3		1.5	2.25	1.06066	0.155685
tr|Q1VF56|Q1VF56_VIBAL	Membrane-bound lytic murein transglycosylase A OS=Vibrio alginolyticus 12G01 GN=V12G01_22143 PE=4 SV=1	367	40545.6		10	4	12	2	4	2	1	0	0	2.66667	0.333333	5.224e-08	8.355e-08	3.363e-08	2.031e-09	0	0	0.5	0	0	0.166667	0.288675	0.0421296
tr|Q1V506|Q1V506_VIBAL	Purine nucleoside phosphorylase DeoD-type OS=Vibrio alginolyticus 12G01 GN=deoD PE=3 SV=1	239	25975.8		10	5	33.1	3	2	2	1	0	1	2.33333	0.666667	1.006e-07	5.158e-08	1.023e-07	2.251e-08	0	1.96e-08	0.333333	0	0.5	0.277778	0.254588	0.0800765
tr|Q1VFR1|Q1VFR1_VIBAL	Putative flagellar motor switch protein OS=Vibrio alginolyticus 12G01 GN=V12G01_05171 PE=4 SV=1	272	30522.8		10	3	15.8	3	1	3	0	2	1	2.33333	1	3.9e-07	3.343e-08	1.228e-07	0	1.296e-07	2.625e-08	0	2	0.333333	0.777778	1.07152	0.0874049
tr|Q1VAA4|Q1VAA4_VIBAL	S-adenosylmethionine:tRNA ribosyltransferase-isomerase OS=Vibrio alginolyticus 12G01 GN=queA PE=3 SV=1	350	39102.8		10	4	10.6	3	4	2	0	0	1	3	0.333333	1.694e-07	1.754e-07	1.334e-07	0	0	4.701e-08	0	0	0.5	0.166667	0.288675	0.034831
tr|Q1V5I7|Q1V5I7_VIBAL	Fatty acid cis/trans isomerase OS=Vibrio alginolyticus 12G01 GN=V12G01_09317 PE=4 SV=1	784	90831.9		10	6	7.7	1	2	3	1	0	2	2	1	1.399e-08	2.254e-08	5.295e-08	1.127e-08	0	1.503e-08	1	0	0.666667	0.555556	0.509175	0.206317
tr|Q1VAJ4|Q1VAJ4_VIBAL	Riboflavin synthase subunit alpha OS=Vibrio alginolyticus 12G01 GN=V12G01_12610 PE=4 SV=1	217	23670.1		10	6	33.6	2	0	2	2	0	2	1.33333	1.33333	1.043e-07	0	1.339e-07	4.575e-08	0	3.834e-08	1		1	1	0	0.169526
tr|Q1V5N0|Q1V5N0_VIBAL	Protein RecA OS=Vibrio alginolyticus 12G01 GN=recA PE=3 SV=1	347	37357		10	5	18.2	3	0	1	1	2	2	1.33333	1.66667	1.398e-07	0	2.621e-08	7.042e-09	4.318e-07	7.542e-08	0.333333		2	1.16667	1.17851	0.104009
tr|Q1VAN9|Q1VAN9_VIBAL	Uncharacterized protein OS=Vibrio alginolyticus 12G01 GN=V12G01_11208 PE=4 SV=1	773	85307		10	11	13.2	2	1	0	0	3	0	1	1	1.162e-08	7.032e-09	0	0	2.408e-08	0	0	3		1.5	2.12132	0.626389
tr|Q1VAW2|Q1VAW2_VIBAL	Ferritin OS=Vibrio alginolyticus 12G01 GN=V12G01_10843 PE=4 SV=1	175	20002.6		10	5	29.7	5	2	1	1	0	1	2.66667	0.666667	1.498e-06	4.607e-07	1.667e-07	4.503e-07	0	1.074e-07	0.2	0	1	0.4	0.52915	0.0274942
tr|Q1VGD5|Q1VGD5_VIBAL	Uncharacterized protein OS=Vibrio alginolyticus 12G01 GN=V12G01_04051 PE=4 SV=1	221	24615.5		10	5	34.8	1	2	5	0	0	0	2.66667	0	1.565e-07	2.087e-07	3.698e-07	0	0	0	0	0	0	0	0	0.00910096
tr|Q1VGD8|Q1VGD8_VIBAL	Uncharacterized protein OS=Vibrio alginolyticus 12G01 GN=V12G01_04036 PE=4 SV=1	261	29531.1		10	6	23.4	2	1	1	3	0	1	1.33333	1.33333	1.087e-07	1.104e-08	1.385e-07	1.003e-07	0	3.821e-08	1.5	0	1	0.833333	0.763763	0.280978
tr|Q1V661|Q1V661_VIBAL	Soluble pyridine nucleotide transhydrogenase (Fragment) OS=Vibrio alginolyticus 12G01 GN=V12G01_09562 PE=4 SV=1	412	45798.2		10	4	10	2	2	3	1	0	1	2.33333	0.666667	1.064e-07	8.446e-08	1.894e-07	1.72e-08	0	1.317e-08	0.5	0	0.333333	0.277778	0.254588	0.0370414
tr|Q1V6I1|Q1V6I1_VIBAL	Ribulose-phosphate 3-epimerase OS=Vibrio alginolyticus 12G01 GN=V12G01_14715 PE=3 SV=1	223	24367.5		9	4	17.5	1	2	3	0	0	2	2	0.666667	1.189e-07	1.93e-07	1.951e-07	0	0	2.045e-07	0	0	0.666667	0.222222	0.3849	0.148905
tr|Q1VG98|Q1VG98_VIBAL	Pyridoxine/pyridoxamine 5'-phosphate oxidase OS=Vibrio alginolyticus 12G01 GN=pdxH PE=3 SV=1	211	24172.5		9	4	16.6	1	1	3	0	0	0	1.66667	0	3.002e-08	1.881e-08	2.177e-07	0	0	0	0	0	0	0	0	0.025373
tr|Q1V312|Q1V312_VIBAL	Lipoyl synthase (Fragment) OS=Vibrio alginolyticus 12G01 GN=V12G01_12445 PE=3 SV=1	222	25167.9		9	4	23.4	2	2	1	0	1	1	1.66667	0.666667	1.746e-07	1.428e-07	8.944e-08	0	3.061e-07	1.071e-07	0	0.5	1	0.5	0.5	0.71926
tr|Q1VC25|Q1VC25_VIBAL	Aconitate hydratase OS=Vibrio alginolyticus 12G01 GN=V12G01_17707 PE=4 SV=1	863	94861.2		9	6	6.4	1	3	2	1	1	0	2	0.666667	1.037e-08	2.246e-08	3.724e-08	3.657e-09	2.286e-08	0	1	0.333333	0	0.444444	0.509175	0.279141
tr|Q1V7H5|Q1V7H5_VIBAL	Putative TldD protein OS=Vibrio alginolyticus 12G01 GN=V12G01_03586 PE=4 SV=1	461	49619		9	5	17.4	3	2	2	0	0	0	2.33333	0	8.9e-08	1.53e-08	2.754e-08	0	0	0	0	0	0	0	0	0.0470861
tr|Q1V7I5|Q1V7I5_VIBAL	Regulator of ribonuclease activity A OS=Vibrio alginolyticus 12G01 GN=rraA PE=3 SV=1	168	18192.9		9	2	13.1	2	2	2	1	0	2	2	1	2.832e-07	2.424e-07	2.653e-07	1.473e-07	0	2.619e-07	0.5	0	1	0.5	0.5	0.181972
tr|Q1VEF4|Q1VEF4_VIBAL	Uncharacterized protein OS=Vibrio alginolyticus 12G01 GN=V12G01_23403 PE=4 SV=1	94	10649.1		9	2	21.3	1	2	2	1	2	1	1.66667	1.33333	9.896e-08	1.777e-07	2.057e-07	6.841e-08	2.348e-07	6.747e-08	1	1	0.5	0.833333	0.288675	0.464714
tr|Q1V3U4|Q1V3U4_VIBAL	Lipoprotein OS=Vibrio alginolyticus 12G01 GN=V12G01_12500 PE=3 SV=1	269	29097.2		9	5	23.4	1	2	3	0	0	3	2	1	5.101e-08	8.591e-08	1.192e-07	0	0	1.193e-07	0	0	1	0.333333	0.57735	0.232476
tr|Q1VDU0|Q1VDU0_VIBAL	4-aminobutyrate aminotransferase OS=Vibrio alginolyticus 12G01 GN=V12G01_19087 PE=3 SV=1	423	45251.2		9	5	17.5	1	3	3	0	0	2	2.33333	0.666667	3.276e-08	6.6e-08	9.933e-08	0	0	4.012e-08	0	0	0.666667	0.222222	0.3849	0.109535
tr|Q1V3Z5|Q1V3Z5_VIBAL	S-adenosylmethionine synthase OS=Vibrio alginolyticus 12G01 GN=metK PE=3 SV=1	384	42047		9	7	15.6	3	0	1	0	4	0	1.33333	1.33333	1.265e-07	0	6.289e-08	0	2.167e-07	0	0		0	0	0	0.631069
tr|Q1VE16|Q1VE16_VIBAL	Putative TonB-dependent ferrichrome receptor OS=Vibrio alginolyticus 12G01 GN=V12G01_18707 PE=3 SV=1	740	82623.5		9	4	6.2	1	3	1	0	1	1	1.66667	0.666667	2.179e-08	2.882e-08	4.63e-09	0	1.615e-08	6.812e-09	0	0.333333	1	0.444444	0.509175	0.326899
tr|Q1V4Q6|Q1V4Q6_VIBAL	Fumarate reductase OS=Vibrio alginolyticus 12G01 GN=V12G01_15195 PE=4 SV=1	599	66198.9		9	9	15.2	2	2	0	2	2	1	1.33333	1.66667	8.467e-08	6.311e-09	0	4.204e-08	6.095e-08	1.143e-08	1	1		1	0	0.587086
tr|Q1V9V8|Q1V9V8_VIBAL	Putative outer membrane protein OS=Vibrio alginolyticus 12G01 GN=V12G01_21363 PE=4 SV=1	191	21421.4		9	3	15.2	2	3	3	1	0	0	2.66667	0.333333	2.571e-07	2.959e-07	4.525e-07	6.1e-08	0	0	0.5	0	0	0.166667	0.288675	0.0125951
tr|Q1VFG1|Q1VFG1_VIBAL	Putative iron(III) compound receptor OS=Vibrio alginolyticus 12G01 GN=V12G01_05671 PE=3 SV=1	700	77612		9	7	11.1	2	3	3	0	0	0	2.66667	0	1.853e-08	3.476e-08	2.293e-08	0	0	0	0	0	0	0	0	0.0722338
tr|Q1V539|Q1V539_VIBAL	3-phosphoshikimate 1-carboxyvinyltransferase OS=Vibrio alginolyticus 12G01 GN=aroA PE=3 SV=1	426	46292.5		9	8	19.7	1	3	2	0	0	1	2	0.333333	1.39e-08	6.269e-08	2.087e-08	0	0	1.252e-08	0	0	0.5	0.166667	0.288675	0.119732
tr|Q1V5R8|Q1V5R8_VIBAL	C4-dicarboxylate-binding periplasmic protein OS=Vibrio alginolyticus 12G01 GN=V12G01_00507 PE=4 SV=1	332	37189.1		9	9	36.7	1	2	3	0	0	1	2	0.333333	3.495e-08	2.834e-08	8.064e-08	0	0	9.217e-08	0	0	0.333333	0.111111	0.19245	0.425751
tr|Q1VB38|Q1VB38_VIBAL	Putative ClpA/B-type protease OS=Vibrio alginolyticus 12G01 GN=V12G01_01545 PE=3 SV=1	894	98479.7		9	10	11.7	5	3	0	0	1	0	2.66667	0.333333	7.052e-08	3.072e-08	0	0	4.32e-09	0	0	0.333333		0.166667	0.235702	0.0771435
tr|Q1VBB3|Q1VBB3_VIBAL	Enoyl-CoA hydratase OS=Vibrio alginolyticus 12G01 GN=V12G01_01170 PE=3 SV=1	258	27653.1		8	5	19	3	1	2	1	0	1	2	0.666667	1.371e-07	6.068e-08	2.099e-07	5.392e-08	0	7.491e-08	0.333333	0	0.5	0.277778	0.254588	0.117382
tr|Q1V2Z5|Q1V2Z5_VIBAL	DNA-directed RNA polymerase beta subunit (Fragment) OS=Vibrio alginolyticus 12G01 GN=V12G01_00015 PE=4 SV=1	72	8444.24		8	3	34.7	0	1	1	0	1	1	0.666667	0.666667	0	6.661e-08	1.86e-07	0	3.872e-07	1.096e-07		1	1	1	0	0.212727
tr|Q1V6U1|Q1V6U1_VIBAL	4-hydroxythreonine-4-phosphate dehydrogenase OS=Vibrio alginolyticus 12G01 GN=pdxA PE=3 SV=1	332	36114.8		8	3	16.9	2	2	2	1	0	1	2	0.666667	2.126e-07	1.258e-07	1.147e-07	6.715e-08	0	1.22e-07	0.5	0	0.5	0.333333	0.288675	0.161186
tr|Q1V477|Q1V477_VIBAL	Peptide methionine sulfoxide reductase MsrA OS=Vibrio alginolyticus 12G01 GN=msrA PE=3 SV=1	212	23768.6		8	4	26.4	1	2	3	1	0	0	2	0.333333	2.432e-08	5.133e-08	1.699e-07	2.887e-08	0	0	1	0	0	0.333333	0.57735	0.0659809
tr|Q1V7M3|Q1V7M3_VIBAL	Uncharacterized protein OS=Vibrio alginolyticus 12G01 GN=V12G01_11523 PE=4 SV=1	252	28463.2		8	4	15.1	1	1	2	1	0	0	1.33333	0.333333	3.234e-08	2.001e-08	6.914e-08	6.245e-08	0	0	1	0	0	0.333333	0.57735	0.333411
tr|Q1V593|Q1V593_VIBAL	Putative protease OS=Vibrio alginolyticus 12G01 GN=V12G01_03427 PE=4 SV=1	696	79726.4		8	5	7.9	1	1	1	1	0	2	1	1	7.042e-10	7.727e-10	1.596e-09	3.908e-10	0	1.754e-08	1	0	2	1	1	0.260816
tr|Q1VE65|Q1VE65_VIBAL	Riboflavin synthase subunit alpha OS=Vibrio alginolyticus 12G01 GN=V12G01_18462 PE=4 SV=1	203	22241.5		8	2	11.3	2	4	0	1	0	1	2	0.666667	4.917e-07	6.482e-07	0	1.615e-08	0	1.166e-07	0.5	0		0.25	0.353553	0.0177258
tr|Q1V3W6|Q1V3W6_VIBAL	Uroporphyrinogen decarboxylase OS=Vibrio alginolyticus 12G01 GN=hemE PE=3 SV=1	355	39299.1		8	4	6.5	2	1	3	1	0	1	2	0.666667	4.953e-08	3.686e-08	1.21e-07	2.056e-08	0	2.518e-08	0.5	0	0.333333	0.277778	0.254588	0.115056
tr|Q1V3N0|Q1V3N0_VIBAL	Outer membrane protein N, non-specific porin OS=Vibrio alginolyticus 12G01 GN=V12G01_06486 PE=4 SV=1	352	37993.1		8	3	13.9	2	1	2	0	0	0	1.66667	0	1.611e-07	1.409e-07	3.064e-07	0	0	0	0	0	0	0	0	0.0111456
tr|Q1V6S4|Q1V6S4_VIBAL	Acetolactate synthase III small subunit OS=Vibrio alginolyticus 12G01 GN=V12G01_12183 PE=4 SV=1	164	18310.6		8	3	17.1	1	2	0	1	0	0	1	0.333333	7.438e-08	1.654e-07	0	5.879e-08	0	0	1	0		0.5	0.707107	0.117552
tr|Q1V8U2|Q1V8U2_VIBAL	Asparagine synthetase OS=Vibrio alginolyticus 12G01 GN=asnB PE=4 SV=1	554	62479.9		8	5	10.3	1	2	1	1	1	2	1.33333	1.33333	8.875e-09	1.864e-08	7.777e-09	3.229e-08	4.22e-09	4.396e-09	1	0.5	2	1.16667	0.763763	0.663515
tr|Q1VEH7|Q1VEH7_VIBAL	Uncharacterized protein OS=Vibrio alginolyticus 12G01 GN=V12G01_23288 PE=4 SV=1	303	33529		8	5	17.2	1	3	3	0	0	0	2.33333	0	6.281e-08	1.141e-07	1.179e-07	0	0	0	0	0	0	0	0	0.0231371
tr|Q1V8Y8|Q1V8Y8_VIBAL	Flagellar P-ring protein OS=Vibrio alginolyticus 12G01 GN=flgI PE=3 SV=1	363	37958.9		8	4	13.2	2	1	1	3	1	0	1.33333	1.33333	2.552e-07	4.106e-08	2.392e-08	7.176e-08	2.719e-08	0	1.5	1	0	0.833333	0.763763	0.129607
tr|Q1V941|Q1V941_VIBAL	Hypothetical ABC transporter, substrate binding protein OS=Vibrio alginolyticus 12G01 GN=V12G01_07228 PE=4 SV=1	331	36789.7		8	4	13	2	2	2	0	0	1	2	0.333333	4.498e-08	3.88e-08	9.097e-08	0	0	1.456e-08	0	0	0.5	0.166667	0.288675	0.0681743
tr|Q1V9I5|Q1V9I5_VIBAL	BolA/YrbA family protein OS=Vibrio alginolyticus 12G01 GN=V12G01_14244 PE=3 SV=1	84	9645.9		8	2	31	1	2	1	2	0	1	1.33333	1	8.797e-08	2.25e-07	1.511e-07	1.159e-06	0	5.122e-08	2	0	1	1	1	0.0807609
tr|Q1V4Y4|Q1V4Y4_VIBAL	Iron-sulfur cluster insertion protein ErpA OS=Vibrio alginolyticus 12G01 GN=erpA PE=3 SV=1	113	11895.7		8	2	24.8	2	1	1	0	1	2	1.33333	1	3.342e-07	2.062e-07	5.425e-07	0	2.81e-07	3.976e-07	0	1	2	1	1	0.242954
tr|Q1VF80|Q1VF80_VIBAL	Uncharacterized protein OS=Vibrio alginolyticus 12G01 GN=V12G01_22023 PE=4 SV=1	195	20980.2		8	2	12.3	2	2	2	1	0	1	2	0.666667	3.79e-07	3.976e-07	2.711e-07	1.443e-07	0	2.53e-07	0.5	0	0.5	0.333333	0.288675	0.0913326
tr|Q1VFN4|Q1VFN4_VIBAL	ScrB (Extracellular solute binging protein) OS=Vibrio alginolyticus 12G01 GN=V12G01_05306 PE=4 SV=1	310	34801		8	3	12.3	1	2	1	1	0	1	1.33333	0.666667	9.347e-08	7.994e-09	4.758e-08	3.095e-08	0	3.696e-08	1	0	1	0.666667	0.57735	0.269046
tr|Q1VFQ2|Q1VFQ2_VIBAL	Putative serine protease OS=Vibrio alginolyticus 12G01 GN=V12G01_05216 PE=3 SV=1	352	38448.6		8	2	11.1	0	3	2	2	0	0	1.66667	0.666667	0	6.362e-08	6.814e-08	6.396e-08	0	0		0	0	0	0	0.302125
tr|Q1V5U9|Q1V5U9_VIBAL	Beta-hexosaminidase OS=Vibrio alginolyticus 12G01 GN=nagZ PE=3 SV=1	327	35988.9		8	3	11	2	1	2	1	0	1	1.66667	0.666667	4.911e-08	3.018e-09	2.332e-08	9.317e-10	0	3.159e-08	0.5	0	0.5	0.333333	0.288675	0.309751
tr|Q1V6J6|Q1V6J6_VIBAL	Uncharacterized protein OS=Vibrio alginolyticus 12G01 GN=V12G01_14640 PE=4 SV=1	219	24686.2		8	4	23.3	1	2	2	2	0	1	1.66667	1	3.789e-08	6.514e-08	9.096e-08	3.259e-08	0	4.085e-08	2	0	0.5	0.833333	1.04083	0.197603
tr|Q1V6T3|Q1V6T3_VIBAL	2-isopropylmalate synthase OS=Vibrio alginolyticus 12G01 GN=leuA PE=3 SV=1	515	56413.2		7	5	15	3	0	2	1	0	1	1.66667	0.666667	6.187e-08	0	3.72e-08	1.534e-08	0	2.206e-08	0.333333		0.5	0.416667	0.117851	0.2476
tr|Q1V9B9|Q1V9B9_VIBAL	UTP-glucose-1-phosphate uridylyltransferase OS=Vibrio alginolyticus 12G01 GN=V12G01_14574 PE=4 SV=1	290	32348.4		7	3	11.7	0	2	2	2	0	1	1.33333	1	0	1.183e-07	1.519e-07	4.534e-08	0	4.71e-08		0	0.5	0.25	0.353553	0.156812
tr|Q1VC00|Q1VC00_VIBAL	Amino acid ABC transporter, periplasmic amino acid-binding protein OS=Vibrio alginolyticus 12G01 GN=V12G01_17832 PE=3 SV=1	253	28591.8		7	4	18.2	2	1	1	2	0	1	1.33333	1	1.949e-07	4.612e-08	8.164e-08	8.908e-08	0	6.195e-08	1	0	1	0.666667	0.57735	0.215528
tr|Q1VC17|Q1VC17_VIBAL	7-cyano-7-deazaguanine synthase OS=Vibrio alginolyticus 12G01 GN=queC PE=3 SV=1	218	24103.9		7	4	24.8	1	2	4	0	0	0	2.33333	0	7.843e-08	2.262e-07	2.298e-07	0	0	0	0	0	0	0	0	0.0124846
tr|Q1VEL7|Q1VEL7_VIBAL	Erythronate-4-phosphate dehydrogenase OS=Vibrio alginolyticus 12G01 GN=pdxB PE=3 SV=1	377	41645.5		7	6	15.6	1	1	2	0	0	0	1.33333	0	3.21e-08	2.389e-08	7.199e-08	0	0	0	0	0	0	0	0	0.0483443
tr|Q1V7L2|Q1V7L2_VIBAL	Putative glycosyltransferase OS=Vibrio alginolyticus 12G01 GN=V12G01_11578 PE=4 SV=1	362	40065.9		7	3	11.3	2	2	2	0	0	1	2	0.333333	8.358e-08	2.89e-08	4.298e-08	0	0	9.017e-08	0	0	0.5	0.166667	0.288675	0.365615
tr|Q1V790|Q1V790_VIBAL	UPF0246 protein V12G01_13479 OS=Vibrio alginolyticus 12G01 GN=V12G01_13479 PE=3 SV=1	258	29281.9		7	5	19.4	1	2	1	0	0	0	1.33333	0	3.126e-08	6.449e-08	3.223e-08	0	0	0	0	0	0	0	0	0.0483443
tr|Q1V368|Q1V368_VIBAL	Uncharacterized protein OS=Vibrio alginolyticus 12G01 GN=V12G01_19861 PE=4 SV=1	141	16176		7	2	14.9	2	2	1	1	0	1	1.66667	0.666667	2.139e-07	1.613e-07	6.129e-08	9.73e-08	0	1.454e-07	0.5	0	1	0.5	0.5	0.254844
tr|Q1VDS9|Q1VDS9_VIBAL	Uncharacterized protein OS=Vibrio alginolyticus 12G01 GN=V12G01_19142 PE=4 SV=1	155	17510		7	3	19.4	2	1	2	2	0	0	1.66667	0.666667	2.547e-07	7.532e-08	3.982e-07	1.294e-07	0	0	1	0	0	0.333333	0.57735	0.0408629
tr|Q1V599|Q1V599_VIBAL	Probable alpha-L-glutamate ligase OS=Vibrio alginolyticus 12G01 GN=rimK PE=3 SV=1	301	32954.2		7	3	10.3	1	1	1	0	0	0	1	0	6.665e-08	8.089e-08	6.453e-08	0	0	0	0	0	0	0	0	0.031847
tr|Q1VCX5|Q1VCX5_VIBAL	Flagellar L-ring protein OS=Vibrio alginolyticus 12G01 GN=flgH PE=1 SV=1	233	25631.1		7	2	9.4	2	2	2	0	0	0	2	0	2.9e-07	1.537e-07	8.699e-08	0	0	0	0	0	0	0	0	0.0125951
tr|Q1VBD8|Q1VBD8_VIBAL	Uncharacterized protein OS=Vibrio alginolyticus 12G01 GN=V12G01_01045 PE=4 SV=1	107	12064.8		7	2	19.6	2	2	2	1	0	0	2	0.333333	1.875e-07	2.722e-07	3.062e-07	2.957e-08	0	0	0.5	0	0	0.166667	0.288675	0.013526
tr|Q1V842|Q1V842_VIBAL	Methionyl-tRNA formyltransferase OS=Vibrio alginolyticus 12G01 GN=fmt PE=3 SV=1	315	34229.6		7	3	14.9	1	2	2	2	0	0	1.66667	0.666667	1.881e-08	1.035e-07	6.219e-08	3.646e-08	0	0	2	0	0	0.666667	1.1547	0.111834
tr|Q1V7K0|Q1V7K0_VIBAL	UDP-glucose:polyglycerol phosphate glucosyltransferase OS=Vibrio alginolyticus 12G01 GN=V12G01_11638 PE=4 SV=1	370	42540.1		7	5	14.9	1	1	1	1	0	0	1	0.333333	1.478e-08	2.481e-08	1.776e-08	7.188e-08	0	0	1	0	0	0.333333	0.57735	0.602874
tr|Q1V3T2|Q1V3T2_VIBAL	Hemin ABC transporter, periplasmic hemin-binding protein HutB OS=Vibrio alginolyticus 12G01 GN=V12G01_06021 PE=4 SV=1	289	30612.4		7	5	22.1	1	4	0	1	1	0	1.66667	0.666667	9.037e-08	2.669e-07	0	2.733e-08	1.296e-07	0	1	0.25		0.625	0.53033	0.189509
tr|Q1V402|Q1V402_VIBAL	Putative translation factor OS=Vibrio alginolyticus 12G01 GN=V12G01_16282 PE=4 SV=1	206	22968.8		7	4	18.9	2	2	2	0	0	1	2	0.333333	1.009e-07	1.512e-07	1.213e-07	0	0	1.386e-07	0	0	0.5	0.166667	0.288675	0.152026
tr|Q1V8W2|Q1V8W2_VIBAL	Hypothetical endoglucanase OS=Vibrio alginolyticus 12G01 GN=V12G01_15595 PE=4 SV=1	368	41439.6		7	4	15.2	1	2	2	0	0	0	1.66667	0	1.976e-08	2.761e-08	4.447e-08	0	0	0	0	0	0	0	0	0.0644888
tr|Q1VEB5|Q1VEB5_VIBAL	Putative stress protein OS=Vibrio alginolyticus 12G01 GN=V12G01_18212 PE=4 SV=1	315	35362.2		7	4	16.2	3	2	0	0	0	1	1.66667	0.333333	7.396e-08	3.206e-08	0	0	0	3.309e-09	0	0		0	0	0.0705335
tr|Q1VEM1|Q1VEM1_VIBAL	Uncharacterized protein OS=Vibrio alginolyticus 12G01 GN=V12G01_23068 PE=4 SV=1	174	18524.4		7	3	25.3	2	1	2	1	1	0	1.66667	0.666667	6.701e-08	5.388e-08	1.378e-07	3.413e-08	5.618e-08	0	0.5	1	0	0.5	0.5	0.161917
tr|Q1VES6|Q1VES6_VIBAL	Flagellar hook-basal body complex protein FliE OS=Vibrio alginolyticus 12G01 GN=fliE PE=3 SV=1	128	13823		7	3	22.7	0	4	0	2	0	0	1.33333	0.666667	0	1.179e-07	0	1.881e-07	0	0		0		0		0.403435
tr|Q1V4E4|Q1V4E4_VIBAL	Cell division protein FtsZ (Fragment) OS=Vibrio alginolyticus 12G01 GN=V12G01_00325 PE=3 SV=1	188	19466.1		7	6	52.1	2	1	1	0	1	0	1.33333	0.333333	2.351e-07	1.53e-07	1.682e-07	0	2.294e-07	0	0	1	0	0.333333	0.57735	0.146691
tr|Q1V4M5|Q1V4M5_VIBAL	Zinc ABC transporter, periplasmic zinc-binding protein OS=Vibrio alginolyticus 12G01 GN=V12G01_15822 PE=3 SV=1	295	32866.7		7	4	20.3	1	2	2	1	0	1	1.66667	0.666667	5.392e-08	6.278e-08	1.271e-07	2.522e-08	0	3.821e-08	1	0	0.5	0.5	0.5	0.123396
tr|Q1VEX2|Q1VEX2_VIBAL	Hydroxyacylglutathione hydrolase OS=Vibrio alginolyticus 12G01 GN=gloB PE=3 SV=1	252	28112.3		7	5	23.4	1	2	3	0	1	0	2	0.333333	5.283e-08	1.367e-07	4.732e-08	0	4.883e-08	0	0	0.5	0	0.166667	0.288675	0.10125
tr|Q1V4X6|Q1V4X6_VIBAL	Fatty acid oxidation complex subunit alpha OS=Vibrio alginolyticus 12G01 GN=fadB PE=3 SV=1	723	78546.5		7	4	7.3	2	1	3	1	0	0	2	0.333333	3.113e-08	8.308e-10	4.697e-08	1.544e-08	0	0	0.5	0	0	0.166667	0.288675	0.165245
tr|Q1V548|Q1V548_VIBAL	HTH-type transcriptional repressor PurR OS=Vibrio alginolyticus 12G01 GN=purR PE=3 SV=1	334	37710		7	5	17.1	3	1	2	0	0	1	2	0.333333	7.981e-08	2.297e-09	1.859e-08	0	0	8.771e-09	0	0	0.5	0.166667	0.288675	0.0984357
tr|Q1VA71|Q1VA71_VIBAL	Uncharacterized protein OS=Vibrio alginolyticus 12G01 GN=V12G01_20798 PE=4 SV=1	907	102152		7	8	7.3	3	1	1	1	0	1	1.66667	0.666667	5.276e-08	2.387e-08	2.003e-08	1.37e-08	0	2.018e-08	0.333333	0	1	0.444444	0.509175	0.235443
tr|Q1VFQ6|Q1VFQ6_VIBAL	Flagellar motor switch protein G OS=Vibrio alginolyticus 12G01 GN=fliG PE=4 SV=1	337	38239.5		7	6	15.7	3	1	1	0	0	0	1.66667	0	5.571e-08	3.879e-09	2.619e-08	0	0	0	0	0	0	0	0	0.0672476
tr|Q1VAF1|Q1VAF1_VIBAL	Putative type I restriction-modification system, M subunit N-6 Adenine-specific DNA methylase OS=Vibrio alginolyticus 12G01 GN=V12G01_12825 PE=4 SV=1	774	87600.8		7	6	9	1	1	0	0	4	1	0.666667	1.66667	2.573e-09	7.161e-09	0	0	1.245e-07	1.914e-08	0	4		2	2.82843	0.0655048
tr|Q1VFW7|Q1VFW7_VIBAL	UPF0176 protein V12G01_04891 OS=Vibrio alginolyticus 12G01 GN=V12G01_04891 PE=3 SV=1	326	37474.6		7	8	26.4	2	2	2	1	0	0	2	0.333333	3.896e-08	3.708e-08	6.342e-08	6.927e-09	0	0	0.5	0	0	0.166667	0.288675	0.0662529
tr|Q1VAG9|Q1VAG9_VIBAL	Chaperone protein DnaJ OS=Vibrio alginolyticus 12G01 GN=dnaJ PE=3 SV=1	382	41145.3		7	6	13.9	2	1	1	0	2	1	1.33333	1	8.431e-08	5.635e-08	4.853e-08	0	4.868e-08	4.531e-08	0	2	1	1	1	0.278665
tr|Q1V5K7|Q1V5K7_VIBAL	Elongation factor 4 OS=Vibrio alginolyticus 12G01 GN=lepA PE=3 SV=1	597	66144		7	3	5.9	0	1	0	0	2	1	0.333333	1	0	3.056e-08	0	0	1.605e-07	4.39e-08		2		2		0.0806759
tr|Q1VAN5|Q1VAN5_VIBAL	Osmolarity response regulator OS=Vibrio alginolyticus 12G01 GN=ompR PE=4 SV=1	239	27425.2		7	4	15.9	1	1	1	0	1	0	1	0.333333	3.637e-08	9.174e-09	4.563e-08	0	4.009e-08	0	0	1	0	0.333333	0.57735	0.30099
tr|Q1VAS3|Q1VAS3_VIBAL	Adenosine deaminase OS=Vibrio alginolyticus 12G01 GN=add PE=3 SV=1	334	36506.6		7	6	25.4	1	1	2	0	1	0	1.33333	0.333333	6.326e-08	5.687e-09	9.307e-08	0	2.834e-08	0	0	1	0	0.333333	0.57735	0.109335
tr|Q1V6B7|Q1V6B7_VIBAL	Uridine kinase OS=Vibrio alginolyticus 12G01 GN=udk PE=3 SV=1	213	24247.5		7	4	22.1	1	0	2	1	0	3	1	1.33333	1.707e-07	0	2.243e-07	2.94e-07	0	2.5e-07	1		1.5	1.25	0.353553	0.418797
tr|Q1V2X7|Q1V2X7_VIBAL	NAD(P)H-flavin reductase OS=Vibrio alginolyticus 12G01 GN=V12G01_09828 PE=4 SV=1	201	22455.9		6	3	13.4	3	1	2	0	0	0	2	0	1.484e-07	9.947e-08	2.182e-07	0	0	0	0	0	0	0	0	0.0143337
tr|Q1VBG7|Q1VBG7_VIBAL	Uncharacterized protein OS=Vibrio alginolyticus 12G01 GN=V12G01_08193 PE=4 SV=1	651	73308.4		6	4	6.3	1	2	2	1	0	0	1.66667	0.333333	1.506e-08	4.015e-09	1.058e-08	2.37e-10	0	0	1	0	0	0.333333	0.57735	0.134691
tr|Q1V6T4|Q1V6T4_VIBAL	3-isopropylmalate dehydrogenase OS=Vibrio alginolyticus 12G01 GN=leuB PE=3 SV=1	363	39356.8		6	4	15.7	1	2	2	0	0	0	1.66667	0	4.229e-08	1.58e-07	8.765e-08	0	0	0	0	0	0	0	0	0.0234219
tr|Q1V380|Q1V380_VIBAL	50S ribosomal protein L24 OS=Vibrio alginolyticus 12G01 GN=rplX PE=3 SV=1	105	11260.2		6	2	10.5	1	1	1	1	2	0	1	1	7.461e-07	2.07e-07	3.781e-07	7.346e-07	1.07e-05	0	1	2	0	1	1	0.0018916
tr|Q1V435|Q1V435_VIBAL	Hypoxanthine-guanine phosphoribosyltransferase OS=Vibrio alginolyticus 12G01 GN=V12G01_21543 PE=4 SV=1	176	20100.5		6	3	17	2	1	0	0	1	0	1	0.333333	2.859e-07	3.393e-08	0	0	1.706e-07	0	0	1		0.5	0.707107	0.264043
tr|Q1V4T7|Q1V4T7_VIBAL	Uncharacterized protein OS=Vibrio alginolyticus 12G01 GN=V12G01_12365 PE=4 SV=1	510	59064		6	2	4.5	1	2	2	0	0	1	1.66667	0.333333	1.102e-08	3.84e-08	5.699e-08	0	0	3.108e-08	0	0	0.5	0.166667	0.288675	0.193458
tr|Q1VAB6|Q1VAB6_VIBAL	Chaperone protein HscA homolog OS=Vibrio alginolyticus 12G01 GN=hscA PE=3 SV=1	617	66380.1		6	4	5.3	2	0	0	0	1	0	0.666667	0.333333	4.436e-08	0	0	0	4.586e-08	0	0			0		0.71543
tr|Q1V755|Q1V755_VIBAL	Carbamoyl-phosphate synthase small chain OS=Vibrio alginolyticus 12G01 GN=carA PE=3 SV=1	392	42649.8		6	4	13.5	4	1	0	0	1	0	1.66667	0.333333	1.429e-07	1.048e-08	0	0	1.031e-07	0	0	1		0.5	0.707107	0.447583
tr|Q1V678|Q1V678_VIBAL	Phosphoglycolate phosphatase OS=Vibrio alginolyticus 12G01 GN=V12G01_15035 PE=3 SV=1	228	24805.6		6	2	13.6	0	3	0	1	0	0	1	0.333333	0	5.015e-08	0	1.077e-08	0	0		0		0		0.207073
tr|Q1V8Z6|Q1V8Z6_VIBAL	Chemotaxis protein methyltransferase OS=Vibrio alginolyticus 12G01 GN=V12G01_15425 PE=3 SV=1	275	30890		6	2	6.5	1	2	1	1	0	1	1.33333	0.666667	7.235e-08	6.967e-08	1.904e-08	2.668e-08	0	4.709e-08	1	0	1	0.666667	0.57735	0.263371
tr|Q1VG39|Q1VG39_VIBAL	Uncharacterized protein OS=Vibrio alginolyticus 12G01 GN=V12G01_04531 PE=4 SV=1	584	63554.4		6	4	7.9	0	2	0	0	0	0	0.666667	0	0	1.026e-08	0	0	0	0		0		0		0.231651
tr|Q1V5S9|Q1V5S9_VIBAL	Thymidylate synthase OS=Vibrio alginolyticus 12G01 GN=thyA PE=3 SV=1	283	32817.3		6	3	10.2	1	1	1	2	0	0	1	0.666667	2.448e-08	3.717e-09	1.232e-08	2.04e-08	0	0	2	0	0	0.666667	1.1547	0.420561
tr|Q1VCB1|Q1VCB1_VIBAL	Uncharacterized protein OS=Vibrio alginolyticus 12G01 GN=V12G01_17277 PE=4 SV=1	154	16762.2		6	2	10.4	2	1	2	0	0	1	1.66667	0.333333	2.465e-07	1.508e-07	3.995e-07	0	0	4.893e-08	0	0	0.5	0.166667	0.288675	0.0160723
tr|Q1V3D1|Q1V3D1_VIBAL	Lactoylglutathione lyase OS=Vibrio alginolyticus 12G01 GN=V12G01_23540 PE=4 SV=1	138	15116.4		6	3	20.3	1	1	1	0	0	1	1	0.333333	4.212e-08	6.86e-08	1.457e-07	0	0	2.727e-08	0	0	1	0.333333	0.57735	0.0592434
tr|Q1V5I3|Q1V5I3_VIBAL	Methylglyoxal synthase OS=Vibrio alginolyticus 12G01 GN=mgsA PE=3 SV=1	151	16961.8		6	3	27.2	1	1	2	1	0	1	1.33333	0.666667	4.186e-08	4.497e-08	1.364e-07	5.527e-08	0	7.098e-08	1	0	0.5	0.5	0.5	0.322278
tr|Q1V316|Q1V316_VIBAL	Putative cell division protein FtsK OS=Vibrio alginolyticus 12G01 GN=V12G01_20331 PE=4 SV=1	863	94684		6	4	2.8	0	0	0	0	4	2	0	2	0	0	0	0	2.703e-07	4.715e-08						0.0182572
tr|Q1V7M4|Q1V7M4_VIBAL	Putative OtnG protein OS=Vibrio alginolyticus 12G01 GN=V12G01_11518 PE=4 SV=1	730	83411.3		6	4	6.8	2	2	0	1	0	0	1.33333	0.333333	8.01e-09	2.028e-08	0	5.057e-08	0	0	0.5	0		0.25	0.353553	0.44726
tr|Q1V4X5|Q1V4X5_VIBAL	3-ketoacyl-CoA thiolase OS=Vibrio alginolyticus 12G01 GN=fadA PE=3 SV=1	391	41439.9		6	3	4.6	2	1	1.99	0	0	0	1.66333	0	2.036e-08	1.31e-08	3.372e-08	0	0	0	0	0	0	0	0	0.0794219
tr|Q1V5P9|Q1V5P9_VIBAL	Putative histidine ammonia-lyase protein OS=Vibrio alginolyticus 12G01 GN=V12G01_00602 PE=4 SV=1	517	57248.2		6	2	5.2	2	1	1	0	0	0	1.33333	0	2.632e-08	3.815e-09	1.21e-08	0	0	0	0	0	0	0	0	0.108765
tr|Q1V781|Q1V781_VIBAL	Threonine synthase OS=Vibrio alginolyticus 12G01 GN=V12G01_13524 PE=4 SV=1	426	46569.7		6	3	6.8	1	1	1	0	0	1	1	0.333333	8.488e-09	6.822e-09	1.276e-08	0	0	2.948e-09	0	0	1	0.333333	0.57735	0.193348
tr|Q1V436|Q1V436_VIBAL	OpaR OS=Vibrio alginolyticus 12G01 GN=V12G01_21538 PE=4 SV=1	204	23649		6	2	9.8	1	1	1	0	0	0	1	0	2.789e-08	8.433e-08	8.798e-08	0	0	0	0	0	0	0	0	0.033407
tr|Q1VB35|Q1VB35_VIBAL	Uncharacterized protein OS=Vibrio alginolyticus 12G01 GN=V12G01_01560 PE=4 SV=1	375	43649.8		6	2	4.5	1	2	0	1	0	0	1	0.333333	7.976e-10	6.777e-09	0	5.537e-10	0	0	1	0		0.5	0.707107	0.301441
tr|Q1VD89|Q1VD89_VIBAL	Putative aminotransferase OS=Vibrio alginolyticus 12G01 GN=V12G01_02325 PE=4 SV=1	382	42258.5		6	4	15.7	1	3	1	0	0	0	1.66667	0	4.538e-08	8.441e-08	2.078e-08	0	0	0	0	0	0	0	0	0.0418278
tr|Q1V3S6|Q1V3S6_VIBAL	Uncharacterized protein OS=Vibrio alginolyticus 12G01 GN=V12G01_06051 PE=4 SV=1	176	20256.3		6	4	39.2	1	1	4	0	0	0	2	0	5.31e-08	1.068e-07	6.821e-07	0	0	0	0	0	0	0	0	0.00792349
tr|Q1V3Y3|Q1V3Y3_VIBAL	FkuA OS=Vibrio alginolyticus 12G01 GN=V12G01_14029 PE=1 SV=1	233	26122.2		6	3	20.6	2	2	2	0	0	0	2	0	7.376e-08	6.724e-08	9.666e-08	0	0	0	0	0	0	0	0	0.0277747
tr|Q1VAX0|Q1VAX0_VIBAL	Ribosomal RNA large subunit methyltransferase J OS=Vibrio alginolyticus 12G01 GN=rlmJ PE=3 SV=1	279	32290.8		6	2	5.7	1	2	1	0	0	1	1.33333	0.333333	6.689e-09	8.486e-09	6.477e-09	0	0	3.505e-09	0	0	1	0.333333	0.57735	0.249199
tr|Q1V7I1|Q1V7I1_VIBAL	ATP-dependent protease subunit HslV OS=Vibrio alginolyticus 12G01 GN=hslV PE=3 SV=1	183	19675.2		6	4	22.4	1	1	1	1	1	1	1	1	2.239e-07	2.292e-07	5.071e-07	1.882e-07	2.158e-07	2.15e-07	1	1	1	1	0	0.269394
tr|Q1V5C7|Q1V5C7_VIBAL	Guanosine-5'-triphosphate,3'-diphosphate pyrophosphatase OS=Vibrio alginolyticus 12G01 GN=gppA PE=3 SV=1	497	55082.7		6	4	6.6	1	1	2	1	0	0	1.33333	0.333333	2.403e-08	1.038e-08	4.183e-08	1.33e-08	0	0	1	0	0	0.333333	0.57735	0.158062
DECOY1_tr|Q1V4L4|Q1V4L4_VIBAL	Reversed decoy version of tr Q1V4L4 Q1V4L4_VIBAL	650	71887.9		6	4	10.6	0	0	1	1	1	1	0.333333	1	0	0	1.999e-08	6.617e-09	5.463e-08	2.289e-08			1	1		0.182321
tr|Q1VET3|Q1VET3_VIBAL	Flagellar protein FlaG OS=Vibrio alginolyticus 12G01 GN=V12G01_22758 PE=4 SV=1	144	15897.8		6	6	40.3	1	2	1	0	0	0	1.33333	0	1.178e-07	2.358e-07	4.826e-08	0	0	0	0	0	0	0	0	0.0168587
tr|Q1V4P8|Q1V4P8_VIBAL	Uncharacterized protein OS=Vibrio alginolyticus 12G01 GN=V12G01_15235 PE=4 SV=1	187	19778.9		6	2	13.9	1	2	2	1	0	0	1.66667	0.333333	5.187e-08	9.181e-08	1.2e-07	2.318e-08	0	0	1	0	0	0.333333	0.57735	0.0524931
tr|Q1V4T3|Q1V4T3_VIBAL	Bifunctional protein HldE OS=Vibrio alginolyticus 12G01 GN=hldE PE=3 SV=1	476	51053.4		6	6	13.9	4	0	0	0	1	0	1.33333	0.333333	1.269e-07	0	0	0	1.276e-08	0	0			0		0.0906823
tr|Q1VF76|Q1VF76_VIBAL	Aerobic glycerol-3-phosphate dehydrogenase OS=Vibrio alginolyticus 12G01 GN=V12G01_22043 PE=3 SV=1	519	58673.8		6	5	8.5	1	1	4	0	0	0	2	0	1.893e-08	1.67e-08	8.221e-08	0	0	0	0	0	0	0	0	0.0524123
tr|Q1V5F3|Q1V5F3_VIBAL	Uncharacterized protein OS=Vibrio alginolyticus 12G01 GN=V12G01_18022 PE=4 SV=1	277	30887.4		6	3	11.6	1	0	2	1	0	1	1	0.666667	7.231e-08	0	4.081e-08	4.461e-08	0	4.022e-08	1		0.5	0.75	0.353553	0.533148
tr|Q1VAU4|Q1VAU4_VIBAL	Ubiquinone/menaquinone biosynthesis C-methyltransferase UbiE OS=Vibrio alginolyticus 12G01 GN=ubiE PE=3 SV=1	259	29061.6		6	4	17	2	0	1	1	1	1	1	1	6.966e-08	0	6.414e-08	6.382e-08	4.121e-08	5.465e-08	0.5		1	0.75	0.353553	0.610546
tr|Q1VAV9|Q1VAV9_VIBAL	Putative sigma-54 interacting response regulator transcription regulator protein OS=Vibrio alginolyticus 12G01 GN=V12G01_10858 PE=4 SV=1	447	50189.9		6	7	23.5	5	0	0	0	0	0	1.66667	0	2.125e-07	0	0	0	0	0	0			0		0.0317067
tr|Q1VGB1|Q1VGB1_VIBAL	Oligopeptide ABC transporter, periplasmic oligopeptide-binding protein OS=Vibrio alginolyticus 12G01 GN=V12G01_04171 PE=4 SV=1	541	61071.6		6	5	12.6	1	2	2	1	0	0	1.66667	0.333333	1.447e-08	2.415e-08	3.494e-08	8.963e-09	0	0	1	0	0	0.333333	0.57735	0.134627
tr|Q1V6E4|Q1V6E4_VIBAL	Molybdenum cofactor biosynthesis protein B OS=Vibrio alginolyticus 12G01 GN=V12G01_23610 PE=4 SV=1	170	18719.2		6	2	18.2	2	1	2	0	0	1	1.66667	0.333333	1.792e-07	8.586e-08	3.405e-07	0	0	8.062e-08	0	0	0.5	0.166667	0.288675	0.0361615
tr|Q1VBB6|Q1VBB6_VIBAL	3-ketoacyl-(Acyl-carrier-protein) reductase OS=Vibrio alginolyticus 12G01 GN=fabG PE=3 SV=1	252	27015.8		6	4	18.7	1	4	1	0	0	0	2	0	1.668e-08	9.851e-08	2.838e-08	0	0	0	0	0	0	0	0	0.0433666
tr|Q1VBM1|Q1VBM1_VIBAL	Thioredoxin 2 OS=Vibrio alginolyticus 12G01 GN=V12G01_07923 PE=4 SV=1	144	15723.7		5	2	20.1	0	3	2	0	0	0	1.66667	0	0	5.604e-07	1.023e-07	0	0	0		0	0	0	0	0.00992136
tr|Q1V328|Q1V328_VIBAL	Lysine decarboxylase OS=Vibrio alginolyticus 12G01 GN=V12G01_00110 PE=4 SV=1	711	80274.8		5	5	8	1	0	0	2	0	1	0.333333	1	4.288e-08	0	0	1.064e-08	0	1.167e-08	2			2		0.418083
tr|Q1V6M7|Q1V6M7_VIBAL	GTP cyclohydrolase-2 OS=Vibrio alginolyticus 12G01 GN=ribA PE=3 SV=1	218	24521.3		5	2	11.5	2	0	0	2	0	0	0.666667	0.666667	2.809e-07	0	0	9.289e-08	0	0	1			1		0.148905
tr|Q1V723|Q1V723_VIBAL	Putative outer membrane protein TolC OS=Vibrio alginolyticus 12G01 GN=V12G01_16057 PE=4 SV=1	423	46710.2		5	3	9.9	1	1	2	1	0	0	1.33333	0.333333	3.541e-08	1.353e-08	1.659e-07	2.241e-08	0	0	1	0	0	0.333333	0.57735	0.0669586
tr|Q1V898|Q1V898_VIBAL	Dihydroxy-acid dehydratase OS=Vibrio alginolyticus 12G01 GN=ilvD PE=3 SV=1	613	66194.9		5	4	5.4	0	1	2	1	0	0	1	0.333333	0	7.046e-09	1.545e-08	5.587e-09	0	0		0	0	0	0	0.298125
tr|Q1V8W0|Q1V8W0_VIBAL	Uncharacterized protein OS=Vibrio alginolyticus 12G01 GN=V12G01_15605 PE=4 SV=1	284	31657.2		5	3	19.4	1	1	1	0	0	1	1	0.333333	1.15e-07	7.528e-07	2.896e-08	0	0	1.357e-07	0	0	1	0.333333	0.57735	0.0286036
tr|Q1V911|Q1V911_VIBAL	Uncharacterized protein OS=Vibrio alginolyticus 12G01 GN=V12G01_15350 PE=4 SV=1	230	25191.9		5	2	10.9	1	2	0	1	0	1	1	0.666667	5.551e-08	6.939e-08	0	7.238e-08	0	2.826e-08	1	0		0.5	0.707107	0.573186
tr|Q1VC23|Q1VC23_VIBAL	PrpE protein OS=Vibrio alginolyticus 12G01 GN=V12G01_17717 PE=4 SV=1	625	69663		5	5	9.8	1	1	3	0	0	0	1.66667	0	1.571e-08	1.831e-08	7.04e-08	0	0	0	0	0	0	0	0	0.057339
tr|Q1V326|Q1V326_VIBAL	50S ribosomal protein L31 OS=Vibrio alginolyticus 12G01 GN=rpmE PE=3 SV=1	73	8082.01		5	3	30.1	1	1	1	1	0	1	1	0.666667	5.531e-07	1.553e-07	2.52e-07	5.498e-08	0	7.629e-08	1	0	1	0.666667	0.57735	0.0244251
tr|Q1VD59|Q1VD59_VIBAL	Uncharacterized protein OS=Vibrio alginolyticus 12G01 GN=V12G01_02475 PE=4 SV=1	259	28672.8		5	3	14.7	1	0	1	2	0	1	0.666667	1	1.4e-08	0	1.833e-08	8.194e-08	0	4.421e-08	2		1	1.5	0.707107	0.16173
tr|Q1VG11|Q1VG11_VIBAL	Putative pullulanase OS=Vibrio alginolyticus 12G01 GN=V12G01_04671 PE=4 SV=1	1329	144868		5	8	7.5	2	2	0	1	0	0	1.33333	0.333333	1.275e-08	1.13e-08	0	4.05e-09	0	0	0.5	0		0.25	0.353553	0.242508
tr|Q1V9L9|Q1V9L9_VIBAL	Putative acetyltransferase OS=Vibrio alginolyticus 12G01 GN=V12G01_09200 PE=4 SV=1	182	21285.8		5	4	25.3	1	0	1	0	1	1	0.666667	0.666667	1.012e-08	0	9.99e-09	0	1.865e-07	8.097e-08	0		1	0.5	0.707107	0.0423294
tr|Q1VCV2|Q1VCV2_VIBAL	Putative virK protein OS=Vibrio alginolyticus 12G01 GN=V12G01_03010 PE=4 SV=1	308	36141.7		5	7	16.9	0	1	3	0	0	1	1.33333	0.333333	0	3.96e-09	4.336e-08	0	0	8.724e-09		0	0.333333	0.166667	0.235702	0.19495
tr|Q1V8F9|Q1V8F9_VIBAL	Translation intiation factor Sui1 OS=Vibrio alginolyticus 12G01 GN=V12G01_08480 PE=4 SV=1	103	11000		5	4	37.9	0	1	1	0	0	0	0.666667	0	0	9.126e-08	1.882e-07	0	0	0		0	0	0	0	0.02417
tr|Q1V7K1|Q1V7K1_VIBAL	Glycosyl transferase OS=Vibrio alginolyticus 12G01 GN=V12G01_11633 PE=4 SV=1	381	43668.2		5	5	17.8	0	1	2	0	0	0	1	0	0	1.51e-08	2.667e-08	0	0	0		0	0	0	0	0.108948
tr|Q1V6N5|Q1V6N5_VIBAL	Cytochrome c-552 OS=Vibrio alginolyticus 12G01 GN=nrfA PE=3 SV=1	469	52351.5		5	2	5.1	1	2	1	0	0	0	1.33333	0	2.813e-08	5.259e-08	5.616e-08	0	0	0	0	0	0	0	0	0.0456111
tr|Q1V9F8|Q1V9F8_VIBAL	Cytoplasmic axial filament protein OS=Vibrio alginolyticus 12G01 GN=V12G01_14379 PE=4 SV=1	489	55495.7		5	3	6.5	1	2	1	0	0	1	1.33333	0.333333	3.905e-08	2.779e-08	2.156e-08	0	0	1.682e-08	0	0	1	0.333333	0.57735	0.155762
tr|Q1V4F6|Q1V4F6_VIBAL	Ribosomal RNA small subunit methyltransferase H OS=Vibrio alginolyticus 12G01 GN=mraW PE=3 SV=1	316	35102.1		5	4	13.3	2	0	0	0	0	0	0.666667	0	6.026e-08	0	0	0	0	0	0			0		0.0846971
tr|Q1VF69|Q1VF69_VIBAL	2,3,4,5-tetrahydropyridine-2,6-dicarboxylate N-succinyltransferase OS=Vibrio alginolyticus 12G01 GN=dapD PE=3 SV=1	343	35673.3		5	2	3.8	1	1	1	1	0	1	1	0.666667	3.384e-08	1.252e-08	3.186e-08	1.468e-08	0	1.382e-08	1	0	1	0.666667	0.57735	0.259481
tr|Q1VB43|Q1VB43_VIBAL	Uncharacterized protein OS=Vibrio alginolyticus 12G01 GN=V12G01_01520 PE=4 SV=1	330	37661.8		5	3	9.7	1	1	1	0	0	0	1	0	1.248e-08	2.69e-08	3.308e-08	0	0	0	0	0	0	0	0	0.0738916
DECOY1_tr|Q1VBT4|Q1VBT4_VIBAL	Reversed decoy version of tr Q1VBT4 Q1VBT4_VIBAL	1018	114538		5	6	5.5	1	1	1	1	0	1	1	0.666667	4.224e-08	3.326e-08	1.21e-07	4.679e-08	0	6.371e-08	1	0	1	0.666667	0.57735	0.329981
tr|Q1VDG5|Q1VDG5_VIBAL	LuxP protein OS=Vibrio alginolyticus 12G01 GN=V12G01_01945 PE=4 SV=1	365	41668.2		5	6	14.2	1	2	1	1	0	0	1.33333	0.333333	2e-08	3.913e-08	2.482e-08	6.688e-09	0	0	1	0	0	0.333333	0.57735	0.10638
tr|Q1V8I8|Q1V8I8_VIBAL	Uncharacterized protein OS=Vibrio alginolyticus 12G01 GN=V12G01_08335 PE=4 SV=1	145	16759.3		5	3	15.2	0	1	1	2	1	0	0.666667	1	0	6.555e-08	1.201e-07	1.399e-07	2.261e-09	0		1	0	0.5	0.707107	0.522478
tr|Q1V3X1|Q1V3X1_VIBAL	Membrane-bound lytic murein transglycosylase C OS=Vibrio alginolyticus 12G01 GN=V12G01_14089 PE=4 SV=1	379	43791.6		5	4	11.3	1	1	1	1	0	0	1	0.333333	4.381e-08	8.735e-09	1.683e-08	2.591e-08	0	0	1	0	0	0.333333	0.57735	0.278623
tr|Q1V401|Q1V401_VIBAL	Uncharacterized protein OS=Vibrio alginolyticus 12G01 GN=V12G01_16287 PE=4 SV=1	236	25287.4		5	4	28.8	0	0	3	1	0	1	1	0.666667	0	0	2.21e-07	4.7e-08	0	8.914e-08			0.333333	0.333333		0.36522
tr|Q1VFA3|Q1VFA3_VIBAL	NH(3)-dependent NAD(+) synthetase OS=Vibrio alginolyticus 12G01 GN=nadE PE=3 SV=1	276	30135.4		5	4	34.1	0	1	2	1	0	0	1	0.333333	0	2.03e-08	1.156e-07	3.883e-08	0	0		0	0	0	0	0.17163
tr|Q1VFE0|Q1VFE0_VIBAL	Putative 3-hydroxyisobutyrate dehydrogenase OS=Vibrio alginolyticus 12G01 GN=V12G01_05776 PE=4 SV=1	292	31576.6		5	3	12	2	0	1	1	0	1	1	0.666667	2.355e-07	0	1.534e-07	1.451e-08	0	4.424e-08	0.5		1	0.75	0.353553	0.0564251
tr|Q1VAM8|Q1VAM8_VIBAL	Guanylate kinase OS=Vibrio alginolyticus 12G01 GN=gmk PE=3 SV=1	207	23496.8		5	5	32.4	2	1	2	0	0	0	1.66667	0	9.625e-08	7.851e-08	9.667e-08	0	0	0	0	0	0	0	0	0.0248544
tr|Q1V5V7|Q1V5V7_VIBAL	Non-canonical purine NTP phosphatase OS=Vibrio alginolyticus 12G01 GN=V12G01_13234 PE=3 SV=1	177	19486.9		5	3	24.9	0	2	1	1	0	0	1	0.333333	0	5.814e-08	6.345e-08	2.291e-08	0	0		0	0	0	0	0.133581
tr|Q1VB31|Q1VB31_VIBAL	Antibiotic acetyltransferase OS=Vibrio alginolyticus 12G01 GN=V12G01_01580 PE=4 SV=1	212	24153		5	3	15.6	2	0	2	0	0	0	1.33333	0	1.23e-07	0	9.867e-08	0	0	0	0		0	0	0	0.0305165
tr|Q1V6G8|Q1V6G8_VIBAL	Peroxiredoxin family protein/glutaredoxin OS=Vibrio alginolyticus 12G01 GN=V12G01_14780 PE=4 SV=1	242	26950.3		5	3	12.4	1	1	2	1	0	0	1.33333	0.333333	1.522e-07	5.669e-08	1.309e-07	4.482e-08	0	0	1	0	0	0.333333	0.57735	0.056136
tr|Q1VBC4|Q1VBC4_VIBAL	Putative NAD(P)H-flavin reductase OS=Vibrio alginolyticus 12G01 GN=V12G01_01115 PE=4 SV=1	218	24564.2		4	3	17.9	2	1	0	1	0	0	1	0.333333	4.458e-08	9.452e-09	0	5.353e-08	0	0	0.5	0		0.25	0.353553	0.710487
tr|Q1V309|Q1V309_VIBAL	Response regulator (Fragment) OS=Vibrio alginolyticus 12G01 GN=V12G01_16317 PE=4 SV=1	161	17720		4	4	29.8	3	0	0	0	0	0	1	0	3.323e-07	0	0	0	0	0	0			0		0.0209777
tr|Q1V2Y2|Q1V2Y2_VIBAL	LSU ribosomal protein L28P (Fragment) OS=Vibrio alginolyticus 12G01 GN=V12G01_11393 PE=4 SV=1	28	3056.66		4	2	39.3	0	1	1	1	1	0	0.666667	0.666667	0	1.294e-06	6.278e-07	2.089e-07	2.637e-07	0		1	0	0.5	0.707107	0.0273156
tr|Q1V626|Q1V626_VIBAL	Uncharacterized protein OS=Vibrio alginolyticus 12G01 GN=V12G01_09737 PE=4 SV=1	274	30656.1		4	3	15	1	0	0	0	1	0	0.333333	0.333333	1.453e-08	0	0	0	5.771e-08	0	0			0		0.219834
tr|Q1V7L5|Q1V7L5_VIBAL	Uncharacterized protein OS=Vibrio alginolyticus 12G01 GN=V12G01_11563 PE=4 SV=1	481	55505.3		4	6	12.3	2	1	1	0	0	0	1.33333	0	3.556e-08	2.842e-08	1.136e-08	0	0	0	0	0	0	0	0	0.0724251
tr|Q1VB42|Q1VB42_VIBAL	Uncharacterized protein OS=Vibrio alginolyticus 12G01 GN=V12G01_01525 PE=4 SV=1	439	50434.9		4	3	9.1	2	1	1	0	0	0	1.33333	0	7.225e-08	2.902e-08	2.838e-08	0	0	0	0	0	0	0	0	0.0474644
tr|Q1VC38|Q1VC38_VIBAL	Low calcium response locus protein H OS=Vibrio alginolyticus 12G01 GN=V12G01_17642 PE=4 SV=1	161	18096.9		4	2	11.2	2	0	1	1	0	0	1	0.333333	7.613e-08	0	8.469e-08	8.247e-09	0	0	0.5		0	0.25	0.353553	0.0598172
tr|Q1V5X9|Q1V5X9_VIBAL	Quinolinate synthase A OS=Vibrio alginolyticus 12G01 GN=nadA PE=3 SV=1	353	38724.7		4	5	21.2	1	1	0	0	1	1	0.666667	0.666667	3.889e-08	1.578e-08	0	0	4.822e-07	7.302e-08	0	1		0.5	0.707107	0.0268268
tr|Q1VAT5|Q1VAT5_VIBAL	Uncharacterized protein OS=Vibrio alginolyticus 12G01 GN=V12G01_10978 PE=4 SV=1	253	28745.4		4	2	7.5	1	0	1	1	0	0	0.666667	0.333333	2.075e-08	0	5.659e-08	4.816e-08	0	0	1		0	0.5	0.707107	0.458584
tr|Q1VA80|Q1VA80_VIBAL	Uncharacterized protein OS=Vibrio alginolyticus 12G01 GN=V12G01_13180 PE=4 SV=1	110	12610.2		4	2	15.5	1	2	1	0	0	0	1.33333	0	4.47e-08	2.227e-07	8.63e-08	0	0	0	0	0	0	0	0	0.0191796
tr|Q1VDL7|Q1VDL7_VIBAL	Thiopurine S-methyltransferase OS=Vibrio alginolyticus 12G01 GN=tpm PE=3 SV=1	242	27897		4	5	24.8	2	0	1	0	0	0	1	0	1.216e-07	0	5.109e-08	0	0	0	0		0	0	0	0.0379256
tr|Q1V3X8|Q1V3X8_VIBAL	Non-canonical purine NTP pyrophosphatase OS=Vibrio alginolyticus 12G01 GN=V12G01_14054 PE=3 SV=1	200	21873		4	2	12	1	0	1	0	0	0	0.666667	0	2.256e-08	0	3.407e-08	0	0	0	0		0	0	0	0.0884081
tr|Q1VDI8|Q1VDI8_VIBAL	Periplasmic nitrate reductase, electron transfer subunit OS=Vibrio alginolyticus 12G01 GN=V12G01_01830 PE=3 SV=1	152	16896.5		4	3	19.7	1	0	1	1	0	0	0.666667	0.333333	4.244e-08	0	5.359e-08	1.524e-08	0	0	1		0	0.5	0.707107	0.134661
tr|Q1VEN2|Q1VEN2_VIBAL	Fatty acid oxidation complex subunit alpha OS=Vibrio alginolyticus 12G01 GN=fadJ PE=3 SV=1	703	76898.5		4	6	11.1	2	1	0	1	0	0	1	0.333333	4.299e-08	3.13e-08	0	7.438e-09	0	0	0.5	0		0.25	0.353553	0.123095
tr|Q1V5K9|Q1V5K9_VIBAL	Ribonuclease 3 OS=Vibrio alginolyticus 12G01 GN=rncS PE=3 SV=1	225	25061.1		4	5	24	1	0	0	0	1	0	0.333333	0.333333	1.85e-08	0	0	0	9.539e-08	0	0			0		0.151005
tr|Q1VFY7|Q1VFY7_VIBAL	Putative carboxypeptidase G2 OS=Vibrio alginolyticus 12G01 GN=V12G01_04791 PE=4 SV=1	374	40707.2		4	3	7.2	2	0	0	0	0	1	0.666667	0.333333	5.855e-08	0	0	0	0	2.873e-08	0			0		0.374729
tr|Q1VCX7|Q1VCX7_VIBAL	Putative flagellar protein OS=Vibrio alginolyticus 12G01 GN=V12G01_02885 PE=4 SV=1	182	19951.7		4	9	62.6	0	1	2	0	0	0	1	0	0	1.015e-08	1.048e-07	0	0	0		0	0	0	0	0.0536833
tr|Q1VEN3|Q1VEN3_VIBAL	Acetyl-CoA acetyltransferase OS=Vibrio alginolyticus 12G01 GN=V12G01_23008 PE=3 SV=1	435	46550.8		4	4	8	1	1	1	0	0	0	1	0	4.305e-08	1.959e-08	4.763e-08	0	0	0	0	0	0	0	0	0.0552306
tr|Q1V770|Q1V770_VIBAL	Glutamate synthase, large subunit OS=Vibrio alginolyticus 12G01 GN=V12G01_13579 PE=4 SV=1	1516	168192		4	9	7.5	0	0	0	1	1	0	0	0.666667	0	0	0	3.084e-09	1.796e-08	0						0.160986
tr|Q1VBG1|Q1VBG1_VIBAL	Uncharacterized protein OS=Vibrio alginolyticus 12G01 GN=V12G01_08223 PE=4 SV=1	779	89633.8		4	6	8.5	0	1	2	0	0	0	1	0	0	5.462e-09	1.432e-08	0	0	0		0	0	0	0	0.166772
tr|Q1VEQ4|Q1VEQ4_VIBAL	Chemotaxis protein CheA OS=Vibrio alginolyticus 12G01 GN=V12G01_22903 PE=4 SV=1	746	80136.1		4	3	6.4	2	0	0	1	0	0	0.666667	0.333333	1.029e-08	0	0	1.013e-09	0	0	0.5			0.5		0.278266
tr|Q1V3L4|Q1V3L4_VIBAL	Putative rare lipoprotein A OS=Vibrio alginolyticus 12G01 GN=V12G01_00120 PE=3 SV=1	267	29925.4		4	2	7.5	1	1	2	0	0	0	1.33333	0	2.556e-08	9.381e-09	5.331e-08	0	0	0	0	0	0	0	0	0.0660234
tr|Q1V7H6|Q1V7H6_VIBAL	Putative PmbA-related protein OS=Vibrio alginolyticus 12G01 GN=V12G01_03581 PE=4 SV=1	447	47828.8		4	2	5.1	1	1	2	0	0	0	1.33333	0	3.61e-09	4.331e-09	3.913e-08	0	0	0	0	0	0	0	0	0.101811
tr|Q1VFQ7|Q1VFQ7_VIBAL	Flagellar M-ring protein OS=Vibrio alginolyticus 12G01 GN=V12G01_05191 PE=3 SV=1	570	62585.1		4	2	3.9	0	2	1	0	0	0	1	0	0	1.162e-08	7.702e-09	0	0	0		0	0	0	0	0.168842
tr|Q1V743|Q1V743_VIBAL	Uncharacterized protein OS=Vibrio alginolyticus 12G01 GN=V12G01_15957 PE=4 SV=1	280	32408.2		4	5	21.4	1	1	1	0	0	0	1	0	1.529e-08	3.758e-08	1.85e-08	0	0	0	0	0	0	0	0	0.0753369
tr|Q1V6A4|Q1V6A4_VIBAL	Putative asparaginase OS=Vibrio alginolyticus 12G01 GN=V12G01_14905 PE=4 SV=1	317	34197		4	3	12.9	0	0	1	0	1	0	0.333333	0.333333	0	0	1.811e-08	0	9.746e-08	0			0	0		0.145211
tr|Q1VDU7|Q1VDU7_VIBAL	Uncharacterized protein OS=Vibrio alginolyticus 12G01 GN=V12G01_19052 PE=4 SV=1	363	41087.1		4	3	8.8	2	1	0	1	0	0	1	0.333333	1.48e-07	8.316e-08	0	2.895e-08	0	0	0.5	0		0.25	0.353553	0.0707333
tr|Q1V3T7|Q1V3T7_VIBAL	Uncharacterized protein OS=Vibrio alginolyticus 12G01 GN=V12G01_12535 PE=4 SV=1	448	50458.8		4	4	12.5	1	1	0	1	0	0	0.666667	0.333333	2.71e-08	5.796e-09	0	2.727e-09	0	0	1	0		0.5	0.707107	0.168731
tr|Q1VC79|Q1VC79_VIBAL	Uncharacterized protein OS=Vibrio alginolyticus 12G01 GN=V12G01_17437 PE=4 SV=1	101	11273.5		4	2	25.7	1	2	0	0	0	0	1	0	3.185e-08	1.004e-07	0	0	0	0	0	0		0	0	0.0469798
tr|Q1V4A4|Q1V4A4_VIBAL	Uncharacterized protein OS=Vibrio alginolyticus 12G01 GN=V12G01_00754 PE=4 SV=1	196	21828.4		4	2	11.7	2	1	1	0	0	0	1.33333	0	3.491e-07	1.168e-07	1.27e-07	0	0	0	0	0	0	0	0	0.0114134
tr|Q1V963|Q1V963_VIBAL	Methylmalonate-semialdehyde dehydrogenase OS=Vibrio alginolyticus 12G01 GN=V12G01_07118 PE=3 SV=1	497	54594.6		4	5	10.3	1	1	2	0	0	0	1.33333	0	2.159e-08	1.563e-08	5.691e-08	0	0	0	0	0	0	0	0	0.0629628
tr|Q1V4N7|Q1V4N7_VIBAL	Putative GTP cyclohydrolase 1 type 2 OS=Vibrio alginolyticus 12G01 GN=V12G01_15762 PE=3 SV=1	252	28097.4		4	2	13.5	2	1	0	1	0	0	1	0.333333	2.092e-07	4.073e-08	0	6.699e-08	0	0	0.5	0		0.25	0.353553	0.126482
tr|Q1V504|Q1V504_VIBAL	Phosphoserine phosphatase OS=Vibrio alginolyticus 12G01 GN=V12G01_21943 PE=4 SV=1	326	35932.5		4	4	12.6	1	1	1	1	0	0	1	0.333333	1.722e-08	3.965e-08	2.022e-08	1.064e-08	0	0	1	0	0	0.333333	0.57735	0.139728
tr|Q1VA31|Q1VA31_VIBAL	RNA methyltransferase, TrmH family protein OS=Vibrio alginolyticus 12G01 GN=V12G01_20998 PE=4 SV=1	244	26162.7		4	2	12.7	2	0	0	0	0	0	0.666667	0	7.92e-07	0	0	0	0	0	0			0		0.00842933
tr|Q1VAN6|Q1VAN6_VIBAL	Uncharacterized protein OS=Vibrio alginolyticus 12G01 GN=V12G01_11223 PE=4 SV=1	131	14887.4		4	3	29.8	0	2	1	0	0	0	1	0	0	2.22e-07	4.815e-09	0	0	0		0	0	0	0	0.0297216
tr|Q1V7M2|Q1V7M2_VIBAL	Putative regulator OS=Vibrio alginolyticus 12G01 GN=V12G01_11528 PE=4 SV=1	226	25432		3	2	11.9	1	1	1	0	0	0	1	0	1.495e-08	7.357e-08	5.187e-08	0	0	0	0	0	0	0	0	0.0445356
tr|Q1VC27|Q1VC27_VIBAL	Methylisocitrate lyase OS=Vibrio alginolyticus 12G01 GN=V12G01_17697 PE=3 SV=1	298	32551.3		3	3	9.4	0	0	2	0	0	0	0.666667	0	0	0	5.774e-08	0	0	0			0	0		0.0871116
tr|Q1V796|Q1V796_VIBAL	Thiol:disulfide interchange protein DsbC OS=Vibrio alginolyticus 12G01 GN=V12G01_13449 PE=4 SV=1	262	28544.3		3	3	13.4	0	1	2	0	0	0	1	0	0	1.666e-08	1.116e-07	0	0	0		0	0	0	0	0.047949
tr|Q1VBC1|Q1VBC1_VIBAL	Putative glycine betaine-binding ABC transporter OS=Vibrio alginolyticus 12G01 GN=V12G01_01130 PE=4 SV=1	312	34356		3	3	8.3	0	0	0	2	0	1	0	1	0	0	0	3.727e-08	0	1.726e-09						0.110589
tr|Q1VD61|Q1VD61_VIBAL	Putative phosphoenolpyruvate synthase regulatory protein OS=Vibrio alginolyticus 12G01 GN=V12G01_02465 PE=3 SV=1	278	31680.3		3	3	11.9	0	0	1	0	1	0	0.333333	0.333333	0	0	6.143e-08	0	1.164e-07	0			0	0		0.35682
tr|Q1VF25|Q1VF25_VIBAL	Uncharacterized protein OS=Vibrio alginolyticus 12G01 GN=V12G01_22298 PE=4 SV=1	247	27602.6		3	4	18.2	0	0	1	0	1	0	0.333333	0.333333	0	0	5.861e-08	0	1.698e-07	0			0	0		0.188786
tr|Q1VBH3|Q1VBH3_VIBAL	Type II restriction enzyme, methylase subunit OS=Vibrio alginolyticus 12G01 GN=V12G01_08163 PE=4 SV=1	1139	129094		3	4	3.4	2	1	0	0	0	0	1	0	3.626e-08	1.727e-08	0	0	0	0	0	0		0	0	0.092068
tr|Q1VEW1|Q1VEW1_VIBAL	Putative amidotransferase OS=Vibrio alginolyticus 12G01 GN=V12G01_22618 PE=4 SV=1	281	31919.6		3	2	8.5	1	0	1	1	0	0	0.666667	0.333333	7.064e-08	0	3.85e-08	1.4e-08	0	0	1		0	0.5	0.707107	0.112336
tr|Q1V4G7|Q1V4G7_VIBAL	Ubiquinol-cytochrome c reductase iron-sulfur subunit OS=Vibrio alginolyticus 12G01 GN=V12G01_00210 PE=3 SV=1	196	21419.9		3	5	28.6	0	1	1	0	0	1	0.666667	0.333333	0	1.495e-07	6.428e-08	0	0	3.133e-07		0	1	0.5	0.707107	0.416094
tr|Q1VFM2|Q1VFM2_VIBAL	L-lactate dehydrogenase [cytochrome] OS=Vibrio alginolyticus 12G01 GN=lldD PE=3 SV=1	379	41419.4		3	4	13.7	0	0	0	0	2	1	0	1	0	0	0	0	3.197e-07	6.077e-09						0.0179766
tr|Q1V9T5|Q1V9T5_VIBAL	Putative multidrug resistance protein OS=Vibrio alginolyticus 12G01 GN=V12G01_08870 PE=4 SV=1	336	37210.1		3	2	5.1	0	1	1	0	0	0	0.666667	0	0	5.649e-09	4.283e-08	0	0	0		0	0	0	0	0.0990138
tr|Q1VCQ5|Q1VCQ5_VIBAL	Uncharacterized protein OS=Vibrio alginolyticus 12G01 GN=V12G01_03245 PE=4 SV=1	362	42580.7		3	3	6.4	2	0	1	0	0	0	1	0	4.831e-08	0	2.935e-08	0	0	0	0		0	0	0	0.0713454
tr|Q1V777|Q1V777_VIBAL	Ribonuclease activity regulator protein RraA OS=Vibrio alginolyticus 12G01 GN=V12G01_13544 PE=3 SV=1	160	17793.1		3	2	13.1	1	0	1	0	0	0	0.666667	0	9.594e-08	0	3.854e-08	0	0	0	0		0	0	0	0.0461509
tr|Q1V6I4|Q1V6I4_VIBAL	30S ribosomal protein S18 OS=Vibrio alginolyticus 12G01 GN=rpsR PE=3 SV=1	75	8855.78		3	2	26.7	0	1	1	0	0	0	0.666667	0	0	2.187e-07	3.704e-07	0	0	0		0	0	0	0	0.0114814
tr|Q1V3W0|Q1V3W0_VIBAL	Uncharacterized protein OS=Vibrio alginolyticus 12G01 GN=V12G01_00070 PE=4 SV=1	232	26623.4		3	2	13.8	0	1	0	1	0	0	0.333333	0.333333	0	1.706e-08	0	1.028e-08	0	0		0		0		0.536064
tr|Q1V7Z9|Q1V7Z9_VIBAL	Spermidine n1-acetyltransferase OS=Vibrio alginolyticus 12G01 GN=V12G01_06256 PE=4 SV=1	179	21466.9		3	3	18.4	0	0	2	0	0	0	0.666667	0	0	0	3.904e-08	0	0	0			0	0		0.113313
tr|Q1VA38|Q1VA38_VIBAL	Uncharacterized protein OS=Vibrio alginolyticus 12G01 GN=V12G01_20963 PE=4 SV=1	465	51659.6		3	2	4.7	1	1	1	0	0	0	1	0	4.55e-09	5.27e-09	7.673e-09	0	0	0	0	0	0	0	0	0.178202
tr|Q1V3J6|Q1V3J6_VIBAL	Thiamin ABC transporter, periplasmic thiamin-binding protein OS=Vibrio alginolyticus 12G01 GN=V12G01_11998 PE=4 SV=1	330	36607.1		3	4	13.3	0	1	2	0	0	0	1	0	0	1.611e-08	1.065e-07	0	0	0		0	0	0	0	0.0500914
tr|Q1VGC2|Q1VGC2_VIBAL	ParB family protein OS=Vibrio alginolyticus 12G01 GN=V12G01_04116 PE=4 SV=1	324	35952.9		3	2	8	2	0	0	0	0	0	0.666667	0	1.994e-07	0	0	0	0	0	0			0		0.0334623
tr|Q1VBS6|Q1VBS6_VIBAL	Uncharacterized protein OS=Vibrio alginolyticus 12G01 GN=V12G01_07648 PE=4 SV=1	553	63159.4		3	2	4.9	1	1	0	0	0	1	0.666667	0.333333	2.046e-08	1.854e-08	0	0	0	9.861e-09	0	0		0	0	0.24987
tr|Q1VAM1|Q1VAM1_VIBAL	Outer membrane receptor protein OS=Vibrio alginolyticus 12G01 GN=V12G01_11298 PE=3 SV=1	866	93775.4		3	4	5.9	0	1	1	0	1	0	0.666667	0.333333	0	1.915e-09	1.997e-08	0	3.589e-08	0		1	0	0.5	0.707107	0.509662
tr|Q1V8J6|Q1V8J6_VIBAL	Aspartate aminotransferase OS=Vibrio alginolyticus 12G01 GN=V12G01_08295 PE=4 SV=1	395	43359.7		3	3	10.1	1	0	1	0	0	1	0.666667	0.333333	5.843e-08	0	3.044e-08	0	0	2.152e-08	0		1	0.5	0.707107	0.178963
tr|Q1V5T2|Q1V5T2_VIBAL	Transcriptional activator protein NhaR OS=Vibrio alginolyticus 12G01 GN=V12G01_13359 PE=4 SV=1	296	34007.1		3	2	8.4	0	1	1	0	0	1	0.666667	0.333333	0	1.585e-08	6.761e-08	0	0	1.337e-08		0	1	0.5	0.707107	0.145275
tr|Q1V615|Q1V615_VIBAL	Protein CyaY OS=Vibrio alginolyticus 12G01 GN=cyaY PE=3 SV=1	104	11993.7		3	2	15.4	1	1	1	0	0	0	1	0	2.011e-07	1.132e-07	2.254e-07	0	0	0	0	0	0	0	0	0.0124208
tr|Q1V3B3|Q1V3B3_VIBAL	Acyl-CoA synthase OS=Vibrio alginolyticus 12G01 GN=V12G01_15912 PE=4 SV=1	563	62809.6		3	2	5.3	0	1	1	0	0	0	0.666667	0	0	3.58e-08	9.678e-09	0	0	0		0	0	0	0	0.10386
tr|Q1V6Z0|Q1V6Z0_VIBAL	Uncharacterized protein OS=Vibrio alginolyticus 12G01 GN=V12G01_06581 PE=3 SV=1	224	24951.4		3	2	9.8	1	1	0	1	0	0	0.666667	0.333333	7.889e-08	2.028e-08	0	1.388e-08	0	0	1	0		0.5	0.707107	0.124438
tr|Q1V384|Q1V384_VIBAL	50S ribosomal protein L16 OS=Vibrio alginolyticus 12G01 GN=rplP PE=3 SV=1	136	15551.5		3	3	25	0	1	0	0	1	0	0.333333	0.333333	0	2.123e-07	0	0	6.218e-08	0		1		1		0.148757
tr|Q1VB79|Q1VB79_VIBAL	Acetyl-CoA synthase OS=Vibrio alginolyticus 12G01 GN=V12G01_01340 PE=4 SV=1	676	75401.5		3	2	2.2	0	0	0	0	1.98	0.99	0	0.99	0	0	0	0	4.587e-07	4.062e-08						0.0112774
tr|Q1V6C1|Q1V6C1_VIBAL	Fatty acid metabolism regulator protein OS=Vibrio alginolyticus 12G01 GN=fadR PE=3 SV=1	279	32103.4		3	3	6.5	1	0	0	0	0	1	0.333333	0.333333	1.424e-08	0	0	0	0	2.921e-08	0			0		0.441679
tr|Q1VCP1|Q1VCP1_VIBAL	Uncharacterized protein OS=Vibrio alginolyticus 12G01 GN=V12G01_16627 PE=4 SV=1	458	51832.6		3	2	3.3	0	1	1	0	1	0	0.666667	0.333333	0	1.617e-08	2.938e-08	0	2.513e-08	0		1	0	0.5	0.707107	0.442219
tr|Q1V8F8|Q1V8F8_VIBAL	Uncharacterized protein OS=Vibrio alginolyticus 12G01 GN=V12G01_08485 PE=4 SV=1	128	14323.3		3	2	18	0	0	0	1	0	2	0	1	0	0	0	1.913e-08	0	7.969e-08						0.054916
DECOY1_tr|Q1V555|Q1V555_VIBAL	Reversed decoy version of tr Q1V555 Q1V555_VIBAL	1489	170092		3	6	3.5	0	0	0	0	1	2	0	1	0	0	0	0	1.658e-08	4.923e-08						0.0756302
tr|Q1VBV5|Q1VBV5_VIBAL	Uncharacterized protein OS=Vibrio alginolyticus 12G01 GN=V12G01_07503 PE=4 SV=1	397	44295.1		3	2	4.5	2	0	0	0	0	0	0.666667	0	2.5e-08	0	0	0	0	0	0			0		0.147647
tr|Q1V4K9|Q1V4K9_VIBAL	Fumarate hydratase class II OS=Vibrio alginolyticus 12G01 GN=fumC PE=3 SV=1	461	48821.1		3	3	7.6	0	0	0	0	0	2	0	0.666667	0	0	0	0	0	3.403e-08						0.12031
tr|Q1VAI3|Q1VAI3_VIBAL	Uncharacterized protein OS=Vibrio alginolyticus 12G01 GN=V12G01_12665 PE=3 SV=1	355	39081.6		3	3	12.1	0	0	0	3	0	0	0	1	0	0	0	9.393e-08	0	0						0.0572795
tr|Q1VAK6|Q1VAK6_VIBAL	Bifunctional phosphopantothenoylcysteine decarboxylase/phosphopantothenate synthase OS=Vibrio alginolyticus 12G01 GN=V12G01_11373 PE=4 SV=1	399	42874.8		3	4	9.8	1	0	1	0	0	1	0.666667	0.333333	4.392e-09	0	3.737e-08	0	0	3.511e-08	0		1	0.5	0.707107	0.634601
tr|Q1V6L7|Q1V6L7_VIBAL	Uncharacterized protein OS=Vibrio alginolyticus 12G01 GN=V12G01_16477 PE=4 SV=1	134	14196.1		3	2	15.7	0	1	2	0	0	0	1	0	0	5.984e-08	1.825e-07	0	0	0		0	0	0	0	0.0272561
tr|Q1VFJ2|Q1VFJ2_VIBAL	Uncharacterized protein OS=Vibrio alginolyticus 12G01 GN=V12G01_05516 PE=4 SV=1	308	34128.9		2	5	21.8	1	0	0	0	0	1	0.333333	0.333333	4.838e-08	0	0	0	0	2.255e-08	0			0		0.374491
tr|Q1VEW7|Q1VEW7_VIBAL	Uncharacterized protein OS=Vibrio alginolyticus 12G01 GN=V12G01_22588 PE=4 SV=1	176	20140.1		2	2	11.4	1	1	0	0	0	0	0.666667	0	1.455e-08	3.594e-08	0	0	0	0	0	0		0	0	0.0953454
tr|Q1V8M6|Q1V8M6_VIBAL	ATP phosphoribosyltransferase OS=Vibrio alginolyticus 12G01 GN=hisG PE=3 SV=1	298	32931.2		2	3	15.4	0	0	2	0	0	0	0.666667	0	0	0	3.738e-08	0	0	0			0	0		0.116442
tr|Q1V5N9|Q1V5N9_VIBAL	Bifunctional protein FolD OS=Vibrio alginolyticus 12G01 GN=folD PE=3 SV=1	286	30890.2		2	2	5.2	1	0	1	0	0	0	0.666667	0	1.587e-08	0	2.43e-08	0	0	0	0		0	0	0	0.111639
tr|Q1V5J3|Q1V5J3_VIBAL	UPF0149 protein V12G01_13889 OS=Vibrio alginolyticus 12G01 GN=V12G01_13889 PE=3 SV=1	192	20583.3		2	2	8.9	0	1	1	0	0	0	0.666667	0	0	1.897e-08	3.77e-08	0	0	0		0	0	0	0	0.0884081
tr|Q1V6R6|Q1V6R6_VIBAL	Putative dihydroxyacetone kinase OS=Vibrio alginolyticus 12G01 GN=V12G01_12223 PE=4 SV=1	211	22797.6		2	2	10.4	1	0	0	0	1	0	0.333333	0.333333	2.052e-07	0	0	0	3.376e-08	0	0			0		0.0911541
tr|Q1V9B3|Q1V9B3_VIBAL	B12-dependent methionine synthase OS=Vibrio alginolyticus 12G01 GN=metH PE=3 SV=1	1226	136896		2	5	6	0	0	0	0	2	0	0	0.666667	0	0	0	0	4.748e-08	0						0.096221
tr|Q1VCF3|Q1VCF3_VIBAL	Uncharacterized protein OS=Vibrio alginolyticus 12G01 GN=V12G01_17067 PE=4 SV=1	272	30910.6		2	5	21	0	0	1	0	0	0	0.333333	0	0	0	2.718e-08	0	0	0			0	0		0.14091
tr|Q1VEK4|Q1VEK4_VIBAL	Adenine phosphoribosyltransferase OS=Vibrio alginolyticus 12G01 GN=apt PE=3 SV=1	181	19706.4		2	2	12.7	1	0	0	0	1	0	0.333333	0.333333	5.934e-08	0	0	0	5.562e-08	0	0			0		0.67875
tr|Q1VBU8|Q1VBU8_VIBAL	Uncharacterized protein OS=Vibrio alginolyticus 12G01 GN=V12G01_07538 PE=4 SV=1	371	42497		2	3	15.9	0	1	1	0	0	0	0.666667	0	0	4.831e-08	1.389e-08	0	0	0		0	0	0	0	0.0833879
tr|Q1V646|Q1V646_VIBAL	Signal recognition particle receptor FtsY OS=Vibrio alginolyticus 12G01 GN=ftsY PE=3 SV=1	403	43944		2	4	12.4	2	0	0	0	0	0	0.666667	0	4.223e-08	0	0	0	0	0	0			0		0.108234
tr|Q1V9G8|Q1V9G8_VIBAL	PmbA protein OS=Vibrio alginolyticus 12G01 GN=V12G01_14329 PE=4 SV=1	447	48408.1		2	2	4.7	1	0	1	0	0	0	0.666667	0	1.522e-08	0	1.64e-08	0	0	0	0		0	0	0	0.12933
tr|Q1VF36|Q1VF36_VIBAL	Na(+)-translocating NADH-quinone reductase subunit C OS=Vibrio alginolyticus 12G01 GN=nqrC PE=1 SV=1	256	27761		2	3	14.5	0	0	0	1	0	1	0	0.666667	0	0	0	2.683e-08	0	8.735e-08						0.0491137
tr|Q1VFX7|Q1VFX7_VIBAL	Protein tyrosine phosphatase OS=Vibrio alginolyticus 12G01 GN=V12G01_04841 PE=4 SV=1	124	13736		2	2	25	0	0	2	0	0	0	0.666667	0	0	0	1.892e-07	0	0	0			0	0		0.034848
tr|Q1V6M4|Q1V6M4_VIBAL	Uncharacterized protein OS=Vibrio alginolyticus 12G01 GN=V12G01_16442 PE=4 SV=1	345	38496.1		2	2	5.2	1	1	0	0	0	0	0.666667	0	1.632e-08	3.203e-08	0	0	0	0	0	0		0	0	0.0994006
tr|Q1VD67|Q1VD67_VIBAL	Putative nucleoprotein/polynucleotide-associated enzyme OS=Vibrio alginolyticus 12G01 GN=V12G01_02435 PE=4 SV=1	173	19739.6		2	3	9.8	0	1	0	0	0	0	0.333333	0	0	3.438e-08	0	0	0	0		0		0		0.122546
tr|Q1V3C6|Q1V3C6_VIBAL	Electron transport complex subunit C OS=Vibrio alginolyticus 12G01 GN=V12G01_23565 PE=3 SV=1	878	94449		2	6	12.3	0	1	1	0	0	0	0.666667	0	0	1.794e-08	2.78e-08	0	0	0		0	0	0	0	0.103558
tr|Q1V5T0|Q1V5T0_VIBAL	Uncharacterized protein OS=Vibrio alginolyticus 12G01 GN=V12G01_13369 PE=4 SV=1	380	43489.4		2	2	5.5	0	1	1	0	0	0	0.666667	0	0	1.5e-08	1.836e-08	0	0	0		0	0	0	0	0.126096
tr|Q1V902|Q1V902_VIBAL	Uncharacterized protein OS=Vibrio alginolyticus 12G01 GN=V12G01_15395 PE=4 SV=1	212	23778		2	3	14.6	0	1	1	0	0	0	0.666667	0	0	4.616e-08	4.188e-08	0	0	0		0	0	0	0	0.0660191
tr|Q1VA57|Q1VA57_VIBAL	Uncharacterized protein OS=Vibrio alginolyticus 12G01 GN=V12G01_20868 PE=4 SV=1	519	61368.4		2	3	5.4	1	1	0	0	0	0	0.666667	0	1.02e-08	1.007e-08	0	0	0	0	0	0		0	0	0.164387
tr|Q1V3Y6|Q1V3Y6_VIBAL	Putative Holliday junction resolvase OS=Vibrio alginolyticus 12G01 GN=V12G01_14014 PE=3 SV=1	141	15622		2	2	17.7	0	1	1	0	0	0	0.666667	0	0	1.226e-07	6.106e-08	0	0	0		0	0	0	0	0.0361105
tr|Q1V3S7|Q1V3S7_VIBAL	Uncharacterized protein OS=Vibrio alginolyticus 12G01 GN=V12G01_06046 PE=4 SV=1	167	18620.7		2	2	11.4	0	0	2	0	0	0	0.666667	0	0	0	2.101e-07	0	0	0			0	0		0.032034
tr|Q1VDL9|Q1VDL9_VIBAL	Cytidine deaminase OS=Vibrio alginolyticus 12G01 GN=cdd PE=3 SV=1	295	32022		2	4	21.7	0	1	0	1	0	0	0.333333	0.333333	0	1.837e-08	0	5.529e-08	0	0		0		0		0.275116
tr|Q1VEY6|Q1VEY6_VIBAL	UDP-3-O-acylglucosamine N-acyltransferase OS=Vibrio alginolyticus 12G01 GN=lpxD PE=3 SV=1	343	36568.6		2	2	16.3	2	0	0	0	0	0	0.666667	0	9.611e-08	0	0	0	0	0	0			0		0.0612795
tr|Q1VFH1|Q1VFH1_VIBAL	Uncharacterized protein OS=Vibrio alginolyticus 12G01 GN=V12G01_05621 PE=4 SV=1	66	7570.92		2	2	22.7	0	0	2	0	0	0	0.666667	0	0	0	3.672e-07	0	0	0			0	0		0.0183634
tr|Q1VDR5|Q1VDR5_VIBAL	Uncharacterized protein OS=Vibrio alginolyticus 12G01 GN=V12G01_19212 PE=4 SV=1	345	37712.4		2	2	7.8	0	1	1	0	0	0	0.666667	0	0	2.497e-08	2.992e-08	0	0	0		0	0	0	0	0.0907673
tr|Q1V4B8|Q1V4B8_VIBAL	Uncharacterized protein OS=Vibrio alginolyticus 12G01 GN=V12G01_09542 PE=4 SV=1	499	56569.1		2	4	8.2	0	0	2	0	0	0	0.666667	0	0	0	1.465e-08	0	0	0			0	0		0.191898
tr|Q1VEQ6|Q1VEQ6_VIBAL	Chemotaxis protein CheY OS=Vibrio alginolyticus 12G01 GN=V12G01_22893 PE=4 SV=1	126	14313.6		2	3	54.8	0	0	0	0	2	0	0	0.666667	0	0	0	0	2.253e-07	0						0.0261169
tr|Q1V8Q0|Q1V8Q0_VIBAL	Trimethylamine-N-oxide reductase OS=Vibrio alginolyticus 12G01 GN=V12G01_20071 PE=3 SV=1	820	92684		2	4	6.2	0	1	1	0	0	0	0.666667	0	0	1.506e-08	5.016e-09	0	0	0		0	0	0	0	0.165301
tr|Q1V9E1|Q1V9E1_VIBAL	MSHA biogenesis protein MshL OS=Vibrio alginolyticus 12G01 GN=V12G01_14464 PE=4 SV=1	529	57033.1		2	3	4.9	0	0	1	0	0	0	0.333333	0	0	0	9.152e-09	0	0	0			0	0		0.244897
DECOY1_tr|Q1VEN2|Q1VEN2_VIBAL	Reversed decoy version of tr Q1VEN2 Q1VEN2_VIBAL	703	76898.5		2	6	9.8	0	0	0	0	2	0	0	0.666667	0	0	0	0	3.374e-08	0						0.121611
tr|Q1V4F2|Q1V4F2_VIBAL	UDP-N-acetylmuramoyl-tripeptide--D-alanyl-D-alanine ligase OS=Vibrio alginolyticus 12G01 GN=V12G01_00285 PE=3 SV=1	454	48815.3		2	3	7.5	0	2	0	0	0	0	0.666667	0	0	2.807e-08	0	0	0	0		0		0		0.138559
tr|Q1V4Y5|Q1V4Y5_VIBAL	Glutamate-1-semialdehyde 2,1-aminomutase OS=Vibrio alginolyticus 12G01 GN=hemL PE=1 SV=1	431	46133.2		2	5	16.9	2	0	0	0	0	0	0.666667	0	7.097e-08	0	0	0	0	0	0			0		0.0753199
tr|Q1V538|Q1V538_VIBAL	Putative outer membrane protein OS=Vibrio alginolyticus 12G01 GN=V12G01_20703 PE=4 SV=1	158	17451.3		2	2	15.2	0	1	1	0	0	0	0.666667	0	0	3.059e-08	7.216e-08	0	0	0		0	0	0	0	0.0581424
tr|Q1V3E7|Q1V3E7_VIBAL	Formate--tetrahydrofolate ligase OS=Vibrio alginolyticus 12G01 GN=fhs PE=3 SV=1	582	62145.9		1	3	5.8	0	0	1	0	0	0	0.333333	0	0	0	1.341e-08	0	0	0			0	0		0.202419
tr|Q1V432|Q1V432_VIBAL	ABC transporter, ATP-binding protein OS=Vibrio alginolyticus 12G01 GN=V12G01_21558 PE=3 SV=1	305	34372.1		1	2	6.9	0	0	0	0	1	0	0	0.333333	0	0	0	0	6.371e-07	0						0.00849309
tr|Q1V663|Q1V663_VIBAL	Putative nucleotide-binding protein OS=Vibrio alginolyticus 12G01 GN=V12G01_15110 PE=4 SV=1	154	17565.7		1	2	15.6	0	0	1	0	0	0	0.333333	0	0	0	1.004e-07	0	0	0			0	0		0.0591753
tr|Q1V6I8|Q1V6I8_VIBAL	Replicative DNA helicase OS=Vibrio alginolyticus 12G01 GN=V12G01_14680 PE=4 SV=1	378	41852.1		1	4	13.8	0	0	0	0	1	0	0	0.333333	0	0	0	0	7.04e-08	0						0.0710223
tr|Q1V7B8|Q1V7B8_VIBAL	UPF0345 protein V12G01_03871 OS=Vibrio alginolyticus 12G01 GN=V12G01_03871 PE=3 SV=1	94	10523.1		1	2	18.1	0	0	1	0	0	0	0.333333	0	0	0	1.959e-07	0	0	0			0	0		0.0337428
tr|Q1VBE7|Q1VBE7_VIBAL	Ribokinase OS=Vibrio alginolyticus 12G01 GN=V12G01_01000 PE=3 SV=1	305	32389.4		1	2	7.2	1	0	0	0	0	0	0.333333	0	6.84e-08	0	0	0	0	0	0			0		0.077271
tr|Q1VA43|Q1VA43_VIBAL	NADH dehydrogenase OS=Vibrio alginolyticus 12G01 GN=V12G01_20938 PE=4 SV=1	429	47165.7		1	2	10.3	0	0	1	0	0	0	0.333333	0	0	0	1.439e-08	0	0	0			0	0		0.1941
DECOY2_tr|Q1V6H8|Q1V6H8_VIBAL	Reversed decoy version of tr Q1V6H8 Q1V6H8_VIBAL	202	22819.7		1	2	12.9	0	0	0	0	1	0	0	0.333333	0	0	0	0	8.071e-08	0						0.0640128
tr|Q1VBH1|Q1VBH1_VIBAL	Uncharacterized protein OS=Vibrio alginolyticus 12G01 GN=V12G01_08173 PE=4 SV=1	680	76629.9		1	3	2.6	1	0	0	0	0	0	0.333333	0	6.566e-09	0	0	0	0	0	0			0		0.289815
DECOY2_tr|Q1VEY3|Q1VEY3_VIBAL	Reversed decoy version of tr Q1VEY3 Q1VEY3_VIBAL	379	42895.5		1	2	7.7	0	0	0	0	1	0	0	0.333333	0	0	0	0	4.883e-08	0						0.0937768
tr|Q1V6G4|Q1V6G4_VIBAL	Argininosuccinate lyase OS=Vibrio alginolyticus 12G01 GN=V12G01_14800 PE=3 SV=1	624	69603.1		1	3	4.2	0	0	0	0	1	0	0	0.333333	0	0	0	0	1.126e-08	0						0.22326
tr|Q1V3C3|Q1V3C3_VIBAL	Formate acetyltransferase OS=Vibrio alginolyticus 12G01 GN=V12G01_23580 PE=3 SV=1	765	85735.8		1	9	8.2	0	0	0	0	1	0	0	0.333333	0	0	0	0	4.96e-08	0						0.0922125
tr|Q1V9Q7|Q1V9Q7_VIBAL	Uncharacterized protein OS=Vibrio alginolyticus 12G01 GN=V12G01_09010 PE=4 SV=1	481	55308.3		1	2	5.4	0	0	1	0	0	0	0.333333	0	0	0	6.535e-09	0	0	0			0	0		0.290325
tr|Q1V829|Q1V829_VIBAL	Carbonic anhydrase, family 3 OS=Vibrio alginolyticus 12G01 GN=V12G01_10616 PE=4 SV=1	182	19879.3		1	3	18.1	0	1	0	0	0	0	0.333333	0	0	2.681e-08	0	0	0	0		0		0		0.141705
tr|Q1VB44|Q1VB44_VIBAL	Uncharacterized protein OS=Vibrio alginolyticus 12G01 GN=V12G01_01515 PE=4 SV=1	314	34878.4		1	2	17.2	0	1	0	0	0	0	0.333333	0	0	7.335e-08	0	0	0	0		0		0		0.0731392
tr|Q1VF39|Q1VF39_VIBAL	Cell division protein BolA OS=Vibrio alginolyticus 12G01 GN=V12G01_22228 PE=3 SV=1	102	11634.7		1	2	23.5	0	0	1	0	0	0	0.333333	0	0	0	1.227e-07	0	0	0			0	0		0.0500191
tr|Q1VF94|Q1VF94_VIBAL	LuxT (Fragment) OS=Vibrio alginolyticus 12G01 GN=V12G01_06006 PE=4 SV=1	132	15240.8		1	2	17.4	0	1	0	0	0	0	0.333333	0	0	2.403e-08	0	0	0	0		0		0		0.151575
DECOY2_tr|Q1VC04|Q1VC04_VIBAL	Reversed decoy version of tr Q1VC04 Q1VC04_VIBAL	244	27128		1	2	14.3	1	0	0	0	0	0	0.333333	0	4.267e-07	0	0	0	0	0	0			0		0.0158045
tr|Q1V3R2|Q1V3R2_VIBAL	Oxaloacetate decarboxylase OS=Vibrio alginolyticus 12G01 GN=V12G01_21383 PE=4 SV=1	594	64510.2		1	5	11.4	0	0	1	0	0	0	0.333333	0	0	0	3.852e-09	0	0	0			0	0		0.373977
tr|Q1V3J8|Q1V3J8_VIBAL	UDP-N-acetylmuramate:L-alanyl-gamma-D-glutamyl-m eso-diaminopimelate ligase OS=Vibrio alginolyticus 12G01 GN=V12G01_11988 PE=3 SV=1	452	49963.2		1	3	6.4	0	0	1	0	0	0	0.333333	0	0	0	1.186e-08	0	0	0			0	0		0.214971
tr|Q1V6D7|Q1V6D7_VIBAL	Oligopeptide transporter ATP-binding component OS=Vibrio alginolyticus 12G01 GN=oppD PE=3 SV=1	323	36044.3		1	2	5	0	0	0	0	1	0	0	0.333333	0	0	0	0	4.665e-08	0						0.0976238
tr|Q1V8F6|Q1V8F6_VIBAL	DamX-related protein OS=Vibrio alginolyticus 12G01 GN=V12G01_08495 PE=4 SV=1	189	20935.2		1	2	11.6	0	0	1	0	0	0	0.333333	0	0	0	1.679e-08	0	0	0			0	0		0.179243
tr|Q1V8U0|Q1V8U0_VIBAL	N-acetylglucosamine repressor OS=Vibrio alginolyticus 12G01 GN=V12G01_15705 PE=4 SV=1	404	43741.7		1	2	5.4	1	0	0	0	0	0	0.333333	0	9.839e-09	0	0	0	0	0	0			0		0.237866
tr|Q1V4X4|Q1V4X4_VIBAL	Zinc-binding alcohol dehydrogenase OS=Vibrio alginolyticus 12G01 GN=V12G01_10031 PE=4 SV=1	326	34945.2		1	2	6.1	1	0	0	0	0	0	0.333333	0	5.209e-09	0	0	0	0	0	0			0		0.325216
tr|Q1V393|Q1V393_VIBAL	Putative RNA-binding protein containing KH domain OS=Vibrio alginolyticus 12G01 GN=V12G01_21763 PE=4 SV=1	98	10998.2		1	2	21.4	0	0	1	0	0	0	0.333333	0	0	0	1.527e-07	0	0	0			0	0		0.041577

## Sheet: plgem results
	Va_pos_vs_Va_neg_STN	Va_pos_vs_Va_neg_p-value
tr|Q1VFR9|Q1VFR9_VIBAL	-1.93341	0.00592136
tr|Q1VB39|Q1VB39_VIBAL	15.8874	0
tr|Q1V395|Q1V395_VIBAL	-1.43657	0.015762
tr|Q1VET5|Q1VET5_VIBAL	-0.385979	0.258533
tr|Q1VFN5|Q1VFN5_VIBAL	-1.40544	0.0169054
tr|Q1V439|Q1V439_VIBAL	-1.26339	0.0245228
tr|Q1VFS1|Q1VFS1_VIBAL	-0.494078	0.190597
tr|Q1V362|Q1V362_VIBAL	-1.57971	0.0112816
tr|Q1VCX2|Q1VCX2_VIBAL	-1.37763	0.0182274
tr|Q1V8Y4|Q1V8Y4_VIBAL	0.423294	0.237637
tr|Q1VET4|Q1VET4_VIBAL	-0.179025	0.48006
tr|Q1VAG8|Q1VAG8_VIBAL	-0.839695	0.0755494
tr|Q1V3W9|Q1V3W9_VIBAL	-0.358016	0.281386
tr|Q1VD14|Q1VD14_VIBAL	-1.12303	0.0358937
tr|Q1V7E1|Q1V7E1_VIBAL	-1.21511	0.0273666
tr|Q1VCX8|Q1VCX8_VIBAL	-1.25253	0.0250797
tr|Q1VFX1|Q1VFX1_VIBAL	-0.540203	0.169526
tr|Q1VCV6|Q1VCV6_VIBAL	10.1799	6.80128e-05
tr|Q1V681|Q1V681_VIBAL	-0.217904	0.429279
tr|Q1V9W3|Q1V9W3_VIBAL	-0.641319	0.130878
tr|Q1VDP2|Q1VDP2_VIBAL	-0.807554	0.0824655
tr|Q1V3X0|Q1V3X0_VIBAL	-0.41487	0.239486
tr|Q1VCX9|Q1VCX9_VIBAL	-1.07409	0.0408289
tr|Q1V5E2|Q1V5E2_VIBAL	-0.954764	0.0561573
tr|Q1V6F0|Q1V6F0_VIBAL	0.55195	0.164264
tr|Q1V4P7|Q1V4P7_VIBAL	-0.348214	0.290053
tr|Q1V3I9|Q1V3I9_VIBAL	-0.65275	0.127698
tr|Q1VB33|Q1VB33_VIBAL	-0.271963	0.365475
tr|Q1VB40|Q1VB40_VIBAL	2.15976	0.00319235
tr|Q1VAZ1|Q1VAZ1_VIBAL	-0.541987	0.168714
tr|Q1V437|Q1V437_VIBAL	-0.717181	0.106984
tr|Q1V5S3|Q1V5S3_VIBAL	-0.331628	0.304599
tr|Q1VG08|Q1VG08_VIBAL	-0.821645	0.0799702
tr|Q1V718|Q1V718_VIBAL	-0.713579	0.108026
tr|Q1VG13|Q1VG13_VIBAL	-0.951089	0.0567439
tr|Q1V348|Q1V348_VIBAL	-0.622522	0.138402
tr|Q1V8Z2|Q1V8Z2_VIBAL	-0.556717	0.162257
tr|Q1V5D5|Q1V5D5_VIBAL	-0.607561	0.143698
tr|Q1VA98|Q1VA98_VIBAL	-1.12162	0.036119
tr|Q1VEZ5|Q1VEZ5_VIBAL	-1.54073	0.012187
tr|Q1VAZ6|Q1VAZ6_VIBAL	-0.573473	0.156812
tr|Q1V354|Q1V354_VIBAL	-0.146613	0.522721
tr|Q1V527|Q1V527_VIBAL	-0.849716	0.073237
tr|Q1VFX5|Q1VFX5_VIBAL	0.123949	0.567371
tr|Q1V607|Q1V607_VIBAL	-0.762281	0.0934708
tr|Q1VA66|Q1VA66_VIBAL	-0.805141	0.0835282
tr|Q1V3D3|Q1V3D3_VIBAL	-0.725456	0.105373
tr|Q1VF93|Q1VF93_VIBAL	-0.901049	0.0657853
tr|Q1VCV1|Q1VCV1_VIBAL	-1.02287	0.0461467
tr|Q1VB00|Q1VB00_VIBAL	-0.515281	0.18
tr|Q1VAR0|Q1VAR0_VIBAL	-1.09498	0.0389883
tr|Q1VDY2|Q1VDY2_VIBAL	-0.30228	0.333747
tr|Q1VFN2|Q1VFN2_VIBAL	-0.511097	0.181947
tr|Q1VB36|Q1VB36_VIBAL	2.7658	0.00173858
tr|Q1VD60|Q1VD60_VIBAL	-0.721802	0.106193
tr|Q1V5L9|Q1V5L9_VIBAL	-0.919281	0.0622359
tr|Q1VCX4|Q1VCX4_VIBAL	-0.513066	0.180935
tr|Q1VC58|Q1VC58_VIBAL	6.10483	0.000357067
tr|Q1VE85|Q1VE85_VIBAL	-0.590971	0.150444
tr|Q1V8Z3|Q1V8Z3_VIBAL	-0.295495	0.341564
tr|Q1VFC2|Q1VFC2_VIBAL	-0.0397804	0.661798
tr|Q1V3Z6|Q1V3Z6_VIBAL	-0.510448	0.182325
tr|Q1VFE7|Q1VFE7_VIBAL	-0.754402	0.0953751
tr|Q1V7J7|Q1V7J7_VIBAL	-1.02694	0.0456111
tr|Q1V4N0|Q1V4N0_VIBAL	-0.78256	0.0888162
tr|Q1V9S9|Q1V9S9_VIBAL	-0.625222	0.13753
tr|Q1V8Y6|Q1V8Y6_VIBAL	-0.213955	0.434457
tr|Q1VAR8|Q1VAR8_VIBAL	-0.400085	0.248153
tr|Q1V8A8|Q1V8A8_VIBAL	-0.318862	0.317433
tr|Q1V2Z8|Q1V2Z8_VIBAL	-0.0552039	0.643209
tr|Q1V4K0|Q1V4K0_VIBAL	-0.648464	0.128689
tr|Q1V4M9|Q1V4M9_VIBAL	-0.61647	0.14017
tr|Q1VEN7|Q1VEN7_VIBAL	-0.850625	0.0731392
tr|Q1VEZ6|Q1VEZ6_VIBAL	0.815107	0.0764123
tr|Q1VAR7|Q1VAR7_VIBAL	-0.431656	0.226976
tr|Q1V9V1|Q1V9V1_VIBAL	-0.493169	0.190954
tr|Q1V8C6|Q1V8C6_VIBAL	-0.332321	0.304119
tr|Q1V4T2|Q1V4T2_VIBAL	-0.822589	0.079762
tr|Q1VA68|Q1VA68_VIBAL	-0.335319	0.301428
tr|Q1VEF7|Q1VEF7_VIBAL	1.33917	0.0173305
tr|Q1V438|Q1V438_VIBAL	-0.577274	0.154891
tr|Q1VB01|Q1VB01_VIBAL	-1.07667	0.0406249
tr|Q1V3Q8|Q1V3Q8_VIBAL	-0.953338	0.0565058
tr|Q1V672|Q1V672_VIBAL	-0.247895	0.394482
tr|Q1V592|Q1V592_VIBAL	-0.867516	0.0709841
tr|Q1V3I6|Q1V3I6_VIBAL	0.188378	0.481101
tr|Q1VET2|Q1VET2_VIBAL	-0.0968468	0.588527
tr|Q1VFL4|Q1VFL4_VIBAL	-1.68555	0.00884591
tr|Q1V799|Q1V799_VIBAL	-0.906636	0.0647779
tr|Q1V8B5|Q1V8B5_VIBAL	-0.255893	0.384021
tr|Q1VF49|Q1VF49_VIBAL	-0.463913	0.207498
tr|Q1V4N1|Q1V4N1_VIBAL	-0.660571	0.125156
tr|Q1VDI3|Q1VDI3_VIBAL	-0.525447	0.175022
tr|Q1VG14|Q1VG14_VIBAL	-0.731059	0.103273
tr|Q1V6I5|Q1V6I5_VIBAL	-0.55384	0.163379
tr|Q1V7B6|Q1V7B6_VIBAL	-1.19299	0.0296196
tr|Q1V4M8|Q1V4M8_VIBAL	-0.667448	0.122287
tr|Q1VG16|Q1VG16_VIBAL	-0.334722	0.301972
tr|Q1V6J1|Q1V6J1_VIBAL	-0.940122	0.0583507
tr|Q1VDI9|Q1VDI9_VIBAL	-0.641208	0.13095
tr|Q1V9V4|Q1V9V4_VIBAL	-0.27543	0.361373
tr|Q1V6N8|Q1V6N8_VIBAL	-0.72408	0.105734
tr|Q1V6S1|Q1V6S1_VIBAL	-0.453029	0.214342
tr|Q1V6R8|Q1V6R8_VIBAL	-0.138527	0.532128
tr|Q1V385|Q1V385_VIBAL	0.30652	0.338852
tr|Q1V4L4|Q1V4L4_VIBAL	-0.703679	0.10996
tr|Q1VB48|Q1VB48_VIBAL	0.675349	0.116026
tr|Q1V4N6|Q1V4N6_VIBAL	-0.544657	0.167566
tr|Q1V5T7|Q1V5T7_VIBAL	-0.752302	0.0958215
tr|Q1V3G9|Q1V3G9_VIBAL	-1.30147	0.022576
tr|Q1V8K2|Q1V8K2_VIBAL	-0.987903	0.0511371
tr|Q1V531|Q1V531_VIBAL	0.0888898	0.618397
tr|Q1VAD2|Q1VAD2_VIBAL	-0.588018	0.151685
tr|Q1V4S4|Q1V4S4_VIBAL	-0.746003	0.0986057
tr|Q1V7S2|Q1V7S2_VIBAL	-0.122282	0.552489
tr|Q1V2Z6|Q1V2Z6_VIBAL	-2.21921	0.0037152
tr|Q1VAD1|Q1VAD1_VIBAL	-0.621482	0.138635
tr|Q1V3K7|Q1V3K7_VIBAL	-0.9683	0.0542529
tr|Q1V9J8|Q1V9J8_VIBAL	-1.1033	0.0377811
tr|Q1V501|Q1V501_VIBAL	-0.119459	0.556395
tr|Q1VEA6|Q1VEA6_VIBAL	-0.908172	0.0646716
tr|Q1V5V4|Q1V5V4_VIBAL	-0.93778	0.0589203
tr|Q1V8A6|Q1V8A6_VIBAL	0.0392452	0.682984
tr|Q1V3P8|Q1V3P8_VIBAL	-1.24247	0.0258023
tr|Q1V5E6|Q1V5E6_VIBAL	-0.928675	0.060017
tr|Q1V3E0|Q1V3E0_VIBAL	-0.399148	0.248659
tr|Q1V906|Q1V906_VIBAL	-0.797758	0.0848162
tr|Q1VC86|Q1VC86_VIBAL	-0.510051	0.182491
tr|Q1V7J6|Q1V7J6_VIBAL	-0.537843	0.170359
tr|Q1V9N6|Q1V9N6_VIBAL	-0.577479	0.154801
tr|Q1VA59|Q1VA59_VIBAL	-1.03345	0.0447311
tr|Q1V3C1|Q1V3C1_VIBAL	-0.379815	0.263575
tr|Q1VAW9|Q1VAW9_VIBAL	-0.964689	0.0548268
tr|Q1V9T1|Q1V9T1_VIBAL	-1.16124	0.0322976
tr|Q1V6U0|Q1V6U0_VIBAL	-0.547837	0.166198
tr|Q1V7J5|Q1V7J5_VIBAL	-0.782755	0.0885696
tr|Q1V8Z9|Q1V8Z9_VIBAL	0.349763	0.295605
tr|Q1V4V6|Q1V4V6_VIBAL	-0.629483	0.135413
tr|Q1V6F3|Q1V6F3_VIBAL	-0.805057	0.0835282
tr|Q1V816|Q1V816_VIBAL	-0.839857	0.0754772
tr|Q1V6R9|Q1V6R9_VIBAL	-0.232252	0.411541
tr|Q1V6Y6|Q1V6Y6_VIBAL	-0.678213	0.118389
tr|Q1V8Y5|Q1V8Y5_VIBAL	-0.232042	0.411936
tr|Q1V9P4|Q1V9P4_VIBAL	-0.523305	0.175817
tr|Q1VC21|Q1VC21_VIBAL	-0.729318	0.10386
tr|Q1V690|Q1V690_VIBAL	-0.877594	0.0688332
tr|Q1V8X7|Q1V8X7_VIBAL	-0.519881	0.178006
tr|Q1V565|Q1V565_VIBAL	-1.16623	0.032051
tr|Q1V917|Q1V917_VIBAL	0.524371	0.176051
tr|Q1VA34|Q1VA34_VIBAL	-0.511944	0.181428
tr|Q1VG42|Q1VG42_VIBAL	-0.442819	0.21946
tr|Q1VEA5|Q1VEA5_VIBAL	-0.361015	0.278708
tr|Q1VA64|Q1VA64_VIBAL	0.0725029	0.639626
tr|Q1V5I9|Q1V5I9_VIBAL	-0.659322	0.125726
tr|Q1VF33|Q1VF33_VIBAL	-0.517968	0.178844
tr|Q1V6K4|Q1V6K4_VIBAL	-0.959136	0.0556174
tr|Q1VEZ3|Q1VEZ3_VIBAL	-1.10752	0.0371265
tr|Q1V5X6|Q1V5X6_VIBAL	-0.922108	0.0614793
tr|Q1V7T7|Q1V7T7_VIBAL	-0.214208	0.434334
tr|Q1VCY0|Q1VCY0_VIBAL	-1.5528	0.0116982
tr|Q1V353|Q1V353_VIBAL	-0.701853	0.110478
tr|Q1VDL3|Q1VDL3_VIBAL	-0.796698	0.0848927
tr|Q1VBU6|Q1VBU6_VIBAL	-1.01079	0.0474644
tr|Q1V7R0|Q1V7R0_VIBAL	-1.20104	0.0286206
tr|Q1VFV5|Q1VFV5_VIBAL	-1.42244	0.0162976
tr|Q1VAH9|Q1VAH9_VIBAL	-0.859001	0.0722253
tr|Q1V3H6|Q1V3H6_VIBAL	-0.471419	0.203834
tr|Q1V8F3|Q1V8F3_VIBAL	-1.09292	0.0390988
tr|Q1V694|Q1V694_VIBAL	-0.41081	0.241739
tr|Q1V491|Q1V491_VIBAL	-0.792648	0.0858491
tr|Q1VAA1|Q1VAA1_VIBAL	-0.685027	0.116451
tr|Q1V5E4|Q1V5E4_VIBAL	-0.832653	0.077152
tr|Q1V5N2|Q1V5N2_VIBAL	-0.914141	0.0637109
tr|Q1V376|Q1V376_VIBAL	0.188965	0.48003
tr|Q1V4P6|Q1V4P6_VIBAL	0.182942	0.488825
tr|Q1V8T7|Q1V8T7_VIBAL	-0.921862	0.0617981
tr|Q1VEY8|Q1VEY8_VIBAL	-0.705064	0.109645
tr|Q1VDI4|Q1VDI4_VIBAL	-0.150377	0.51793
tr|Q1VER9|Q1VER9_VIBAL	-0.803904	0.0839447
tr|Q1V4L8|Q1V4L8_VIBAL	-0.696406	0.112833
tr|Q1VA40|Q1VA40_VIBAL	-0.793639	0.085509
tr|Q1V5F9|Q1V5F9_VIBAL	-0.00442281	0.707792
tr|Q1V596|Q1V596_VIBAL	-0.672514	0.120434
tr|Q1V8Y7|Q1V8Y7_VIBAL	-0.167492	0.495664
tr|Q1V8Z1|Q1V8Z1_VIBAL	-0.0892858	0.599061
tr|Q1V8J3|Q1V8J3_VIBAL	-0.33867	0.298461
tr|Q1V4G4|Q1V4G4_VIBAL	-1.13811	0.0341594
tr|Q1VFJ6|Q1VFJ6_VIBAL	0.37197	0.275911
tr|Q1V8Y1|Q1V8Y1_VIBAL	-0.231374	0.41251
tr|Q1VEU7|Q1VEU7_VIBAL	-0.666559	0.122491
tr|Q1VA35|Q1VA35_VIBAL	-0.950682	0.0567906
tr|Q1V5G8|Q1V5G8_VIBAL	-1.34049	0.0205441
tr|Q1V4R6|Q1V4R6_VIBAL	-0.474392	0.201632
tr|Q1V7I2|Q1V7I2_VIBAL	-0.134172	0.537343
tr|Q1V7R7|Q1V7R7_VIBAL	-0.0843753	0.605717
tr|Q1V8J1|Q1V8J1_VIBAL	-0.509434	0.182865
tr|Q1V311|Q1V311_VIBAL	-0.480775	0.197921
tr|Q1V4N3|Q1V4N3_VIBAL	0.266436	0.382971
tr|Q1V3M3|Q1V3M3_VIBAL	-0.603406	0.145135
tr|Q1VEU6|Q1VEU6_VIBAL	-1.03169	0.0451307
tr|Q1VEZ4|Q1VEZ4_VIBAL	-0.659292	0.12573
tr|Q1V4N9|Q1V4N9_VIBAL	-0.816725	0.0805909
tr|Q1VAC4|Q1VAC4_VIBAL	-1.30902	0.0221084
tr|Q1V3A5|Q1V3A5_VIBAL	-0.410983	0.24156
tr|Q1V9T3|Q1V9T3_VIBAL	-0.188772	0.467158
tr|Q1VF70|Q1VF70_VIBAL	-0.886149	0.067745
tr|Q1VB88|Q1VB88_VIBAL	-0.789	0.0865335
tr|Q1VCT7|Q1VCT7_VIBAL	-0.365885	0.275095
tr|Q1VDL2|Q1VDL2_VIBAL	-0.888029	0.0675707
tr|Q1V8J5|Q1V8J5_VIBAL	-0.636296	0.132697
tr|Q1VAG5|Q1VAG5_VIBAL	-0.188602	0.467486
tr|Q1VG95|Q1VG95_VIBAL	-0.814934	0.0808247
tr|Q1V693|Q1V693_VIBAL	-0.395882	0.251192
tr|Q1V8L9|Q1V8L9_VIBAL	-0.620183	0.139022
tr|Q1V5V9|Q1V5V9_VIBAL	-0.127073	0.546431
tr|Q1VEY7|Q1VEY7_VIBAL	-0.121731	0.553343
tr|Q1VG48|Q1VG48_VIBAL	-1.38564	0.0177556
tr|Q1V359|Q1V359_VIBAL	-0.0448515	0.656349
tr|Q1V379|Q1V379_VIBAL	0.463838	0.210363
tr|Q1VE41|Q1VE41_VIBAL	0.405914	0.248825
tr|Q1V6A3|Q1V6A3_VIBAL	-0.989314	0.0509713
tr|Q1V8Y0|Q1V8Y0_VIBAL	-0.497704	0.188727
tr|Q1VAB9|Q1VAB9_VIBAL	-1.24478	0.0255983
tr|Q1V6W9|Q1V6W9_VIBAL	-0.790342	0.0863634
tr|Q1V7X8|Q1V7X8_VIBAL	0.128998	0.560633
tr|Q1V3V0|Q1V3V0_VIBAL	-0.63935	0.131639
tr|Q1VA77|Q1VA77_VIBAL	-0.862438	0.0718342
tr|Q1V704|Q1V704_VIBAL	1.59881	0.00899894
tr|Q1V321|Q1V321_VIBAL	-0.387361	0.257441
tr|Q1V325|Q1V325_VIBAL	2.00964	0.00414028
tr|Q1V3V1|Q1V3V1_VIBAL	-1.01283	0.0472434
tr|Q1V8H9|Q1V8H9_VIBAL	-0.958981	0.0556174
tr|Q1V450|Q1V450_VIBAL	0.226768	0.42976
tr|Q1V4E1|Q1V4E1_VIBAL	-0.63753	0.132349
tr|Q1VFN1|Q1VFN1_VIBAL	-0.175492	0.485768
tr|Q1VFS4|Q1VFS4_VIBAL	-1.32917	0.021135
tr|Q1VC88|Q1VC88_VIBAL	-1.08044	0.0400255
tr|Q1V7V3|Q1V7V3_VIBAL	-0.655033	0.126988
tr|Q1VEW2|Q1VEW2_VIBAL	-0.472829	0.202806
tr|Q1V4P2|Q1V4P2_VIBAL	-1.55431	0.0116599
tr|Q1VAN8|Q1VAN8_VIBAL	-0.796069	0.0849989
tr|Q1V9I3|Q1V9I3_VIBAL	-1.15869	0.0325654
tr|Q1VAX1|Q1VAX1_VIBAL	-0.791507	0.0860234
tr|Q1VDK4|Q1VDK4_VIBAL	-0.655914	0.126521
tr|Q1V4P4|Q1V4P4_VIBAL	-0.7882	0.0871498
tr|Q1VBB0|Q1VBB0_VIBAL	-0.608434	0.143235
tr|Q1VCT6|Q1VCT6_VIBAL	-0.746263	0.0985717
tr|Q1VCX3|Q1VCX3_VIBAL	-0.908188	0.0646716
tr|Q1VDF7|Q1VDF7_VIBAL	-0.593904	0.149029
tr|Q1V595|Q1V595_VIBAL	-0.00918447	0.700374
tr|Q1VG49|Q1VG49_VIBAL	-0.81199	0.0814708
tr|Q1V8U6|Q1V8U6_VIBAL	-0.347787	0.290338
tr|Q1V422|Q1V422_VIBAL	-0.898642	0.0660319
tr|Q1VCP3|Q1VCP3_VIBAL	-0.526172	0.174835
tr|Q1V8T3|Q1V8T3_VIBAL	-0.428354	0.229909
tr|Q1VB47|Q1VB47_VIBAL	0.105884	0.593143
tr|Q1V6T9|Q1V6T9_VIBAL	-0.430209	0.228387
tr|Q1V381|Q1V381_VIBAL	0.885711	0.062712
tr|Q1V3A4|Q1V3A4_VIBAL	0.0278265	0.697632
tr|Q1V8C7|Q1V8C7_VIBAL	-0.788441	0.0871243
tr|Q1V535|Q1V535_VIBAL	1.01566	0.0425165
tr|Q1VB60|Q1VB60_VIBAL	2.07987	0.00368969
tr|Q1VAI5|Q1VAI5_VIBAL	-0.438238	0.222436
tr|Q1VBP2|Q1VBP2_VIBAL	-0.236411	0.407766
tr|Q1V6I2|Q1V6I2_VIBAL	0.610156	0.140455
tr|Q1VBE6|Q1VBE6_VIBAL	0.938266	0.0540064
tr|Q1V541|Q1V541_VIBAL	-0.863051	0.0716982
tr|Q1V5R5|Q1V5R5_VIBAL	-0.932578	0.0593199
tr|Q1V305|Q1V305_VIBAL	-0.587164	0.151779
tr|Q1VC07|Q1VC07_VIBAL	-0.983031	0.0521318
tr|Q1VF19|Q1VF19_VIBAL	-1.54385	0.0121445
tr|Q1VBS0|Q1VBS0_VIBAL	-0.97223	0.0539851
tr|Q1VDA8|Q1VDA8_VIBAL	-0.9256	0.0610372
tr|Q1VF42|Q1VF42_VIBAL	-0.773339	0.0910521
tr|Q1VAI2|Q1VAI2_VIBAL	-1.08889	0.0395792
tr|Q1VFZ6|Q1VFZ6_VIBAL	-0.700409	0.111575
tr|Q1V6B9|Q1V6B9_VIBAL	-1.29851	0.0227163
tr|Q1V6D3|Q1V6D3_VIBAL	-0.0489777	0.65095
tr|Q1V5B9|Q1V5B9_VIBAL	-0.878596	0.0687311
tr|Q1VB59|Q1VB59_VIBAL	2.22845	0.00300106
tr|Q1V4F9|Q1V4F9_VIBAL	-1.00723	0.0480935
tr|Q1VEY5|Q1VEY5_VIBAL	-1.0517	0.0422529
tr|Q1V509|Q1V509_VIBAL	-0.906363	0.0647906
tr|Q1V532|Q1V532_VIBAL	-0.456707	0.21254
tr|Q1V5B0|Q1V5B0_VIBAL	-0.678542	0.118295
tr|Q1VCS7|Q1VCS7_VIBAL	-0.845294	0.0739086
tr|Q1VCX1|Q1VCX1_VIBAL	-0.379556	0.263702
tr|Q1VED6|Q1VED6_VIBAL	-1.01679	0.0469671
tr|Q1V4S3|Q1V4S3_VIBAL	-0.638043	0.132077
tr|Q1V5D0|Q1V5D0_VIBAL	1.74471	0.00654198
tr|Q1VBR3|Q1VBR3_VIBAL	-0.135123	0.536319
tr|Q1V8N8|Q1V8N8_VIBAL	-0.934757	0.0591753
tr|Q1VAJ6|Q1VAJ6_VIBAL	-0.37078	0.271141
tr|Q1V692|Q1V692_VIBAL	-0.528086	0.173994
tr|Q1V3A9|Q1V3A9_VIBAL	-0.138129	0.532752
tr|Q1V7V9|Q1V7V9_VIBAL	-0.928657	0.060017
tr|Q1V8N7|Q1V8N7_VIBAL	-0.637313	0.132349
tr|Q1V4B4|Q1V4B4_VIBAL	-0.231672	0.412234
tr|Q1V5W4|Q1V5W4_VIBAL	0.315851	0.329649
tr|Q1V6D2|Q1V6D2_VIBAL	-1.22812	0.0266057
tr|Q1VCY8|Q1VCY8_VIBAL	-0.525321	0.175022
tr|Q1V3K8|Q1V3K8_VIBAL	-0.71467	0.107685
tr|Q1VED3|Q1VED3_VIBAL	-0.327603	0.308684
tr|Q1VET6|Q1VET6_VIBAL	-0.648807	0.128676
tr|Q1V4R4|Q1V4R4_VIBAL	-0.834295	0.0769394
tr|Q1VAC6|Q1VAC6_VIBAL	-0.60162	0.145828
tr|Q1V369|Q1V369_VIBAL	-0.644161	0.129887
tr|Q1VCW7|Q1VCW7_VIBAL	-1.15358	0.0331732
tr|Q1V8D8|Q1V8D8_VIBAL	-0.259719	0.379885
tr|Q1VAA5|Q1VAA5_VIBAL	-1.02737	0.0456111
tr|Q1VAJ5|Q1VAJ5_VIBAL	-0.531568	0.172701
tr|Q1VG15|Q1VG15_VIBAL	-0.786802	0.0877322
tr|Q1VAT3|Q1VAT3_VIBAL	-0.895642	0.0664867
tr|Q1VB20|Q1VB20_VIBAL	-0.803097	0.084051
tr|Q1V775|Q1V775_VIBAL	-0.221824	0.424055
tr|Q1VB28|Q1VB28_VIBAL	-0.169622	0.493403
tr|Q1V4W7|Q1V4W7_VIBAL	-1.03369	0.0447269
tr|Q1V6Q6|Q1V6Q6_VIBAL	-0.0766285	0.61464
tr|Q1V344|Q1V344_VIBAL	-0.121801	0.553216
tr|Q1V7M5|Q1V7M5_VIBAL	-0.730293	0.103634
tr|Q1VEQ0|Q1VEQ0_VIBAL	-0.980325	0.0525186
tr|Q1V4I1|Q1V4I1_VIBAL	-0.424584	0.232582
tr|Q1VAT1|Q1VAT1_VIBAL	-0.579822	0.153717
tr|Q1VGD0|Q1VGD0_VIBAL	-0.210253	0.439116
tr|Q1V6H6|Q1V6H6_VIBAL	-1.1638	0.0321785
tr|Q1V6P1|Q1V6P1_VIBAL	-0.278368	0.358687
tr|Q1V391|Q1V391_VIBAL	-0.353476	0.285781
tr|Q1V8X9|Q1V8X9_VIBAL	-0.292403	0.344969
tr|Q1V472|Q1V472_VIBAL	-0.135469	0.536026
tr|Q1VEY0|Q1VEY0_VIBAL	-0.236189	0.408162
tr|Q1V9W5|Q1V9W5_VIBAL	-0.340624	0.296965
tr|Q1V324|Q1V324_VIBAL	-0.250604	0.391345
tr|Q1V8J4|Q1V8J4_VIBAL	-0.744171	0.0993199
tr|Q1VDY1|Q1VDY1_VIBAL	-0.80849	0.0823039
tr|Q1V8Q3|Q1V8Q3_VIBAL	-0.523537	0.175715
tr|Q1VAD9|Q1VAD9_VIBAL	0.450469	0.219061
tr|Q1V301|Q1V301_VIBAL	-0.0604855	0.636434
tr|Q1V798|Q1V798_VIBAL	0.0489392	0.671243
tr|Q1V374|Q1V374_VIBAL	-0.0877649	0.60145
tr|Q1V3Q7|Q1V3Q7_VIBAL	-0.348799	0.289696
tr|Q1VFI6|Q1VFI6_VIBAL	-1.50245	0.013254
tr|Q1VAM9|Q1VAM9_VIBAL	-0.900009	0.0659044
tr|Q1VB27|Q1VB27_VIBAL	-0.545892	0.167018
tr|Q1V6D0|Q1V6D0_VIBAL	-0.907792	0.0647056
tr|Q1V6S7|Q1V6S7_VIBAL	-1.11518	0.0367736
tr|Q1VC62|Q1VC62_VIBAL	0.0114078	0.717313
tr|Q1V856|Q1V856_VIBAL	-0.526217	0.174806
tr|Q1VEL9|Q1VEL9_VIBAL	-0.344967	0.292506
tr|Q1V8Z0|Q1V8Z0_VIBAL	0.260348	0.389743
tr|Q1V905|Q1V905_VIBAL	0.491008	0.19407
tr|Q1V9A9|Q1V9A9_VIBAL	-0.827362	0.07861
tr|Q1V9J3|Q1V9J3_VIBAL	0.236434	0.41901
tr|Q1V560|Q1V560_VIBAL	-0.503004	0.185594
tr|Q1VFN6|Q1VFN6_VIBAL	0.146854	0.538321
tr|Q1VFP7|Q1VFP7_VIBAL	-0.546948	0.166601
tr|Q1V5X8|Q1V5X8_VIBAL	-1.19373	0.0295685
tr|Q1V6R7|Q1V6R7_VIBAL	-0.589617	0.150971
tr|Q1VC30|Q1VC30_VIBAL	-0.420399	0.235719
tr|Q1V7T1|Q1V7T1_VIBAL	-0.942866	0.0581424
tr|Q1V3J9|Q1V3J9_VIBAL	-0.432981	0.22613
tr|Q1VAC3|Q1VAC3_VIBAL	-0.452322	0.214584
tr|Q1V617|Q1V617_VIBAL	-0.549552	0.165594
tr|Q1V3Z8|Q1V3Z8_VIBAL	-1.0993	0.0381424
tr|Q1VE42|Q1VE42_VIBAL	-0.10009	0.583358
tr|Q1V9E7|Q1V9E7_VIBAL	0.140644	0.546091
tr|Q1VAC0|Q1VAC0_VIBAL	-1.03694	0.0441785
tr|Q1V5U6|Q1V5U6_VIBAL	-0.0657349	0.628948
tr|Q1VB55|Q1VB55_VIBAL	-1.22967	0.0265632
tr|Q1V6E0|Q1V6E0_VIBAL	-0.329003	0.307379
tr|Q1V7S6|Q1V7S6_VIBAL	-0.821891	0.0799702
tr|Q1VBJ4|Q1VBJ4_VIBAL	-0.14733	0.521858
tr|Q1V7J4|Q1V7J4_VIBAL	-1.33811	0.0206164
tr|Q1V5L2|Q1V5L2_VIBAL	-0.806486	0.0833879
tr|Q1V323|Q1V323_VIBAL	1.21256	0.0239617
tr|Q1V377|Q1V377_VIBAL	-0.32887	0.307486
tr|Q1V398|Q1V398_VIBAL	-0.966254	0.0544315
tr|Q1VD23|Q1VD23_VIBAL	-0.508215	0.183341
tr|Q1VDI5|Q1VDI5_VIBAL	-0.583009	0.152595
tr|Q1V8H7|Q1V8H7_VIBAL	-0.105166	0.576616
tr|Q1V4J1|Q1V4J1_VIBAL	-0.749974	0.0968289
tr|Q1V9D3|Q1V9D3_VIBAL	-0.815136	0.0807736
tr|Q1VAC7|Q1VAC7_VIBAL	-0.746657	0.0984357
tr|Q1VG68|Q1VG68_VIBAL	-0.712168	0.108353
tr|Q1V340|Q1V340_VIBAL	-0.584384	0.152319
tr|Q1V676|Q1V676_VIBAL	-1.06229	0.041577
tr|Q1V6M6|Q1V6M6_VIBAL	-0.846497	0.0737938
tr|Q1V783|Q1V783_VIBAL	-1.85261	0.00657598
tr|Q1VC87|Q1VC87_VIBAL	-0.0955198	0.590487
tr|Q1V394|Q1V394_VIBAL	-0.628716	0.135596
tr|Q1VCX0|Q1VCX0_VIBAL	-0.0479116	0.652157
tr|Q1VEK9|Q1VEK9_VIBAL	-1.02815	0.0455048
tr|Q1V9C1|Q1V9C1_VIBAL	0.423186	0.237734
tr|Q1VF74|Q1VF74_VIBAL	-0.044265	0.656999
tr|Q1V571|Q1V571_VIBAL	-1.28433	0.0232221
tr|Q1VAQ9|Q1VAQ9_VIBAL	-0.988516	0.0510521
tr|Q1VCS9|Q1VCS9_VIBAL	-1.13592	0.0342997
tr|Q1V3W1|Q1V3W1_VIBAL	0.298432	0.34664
tr|Q1VEA1|Q1VEA1_VIBAL	-0.726002	0.105007
tr|Q1VEY4|Q1VEY4_VIBAL	-0.5839	0.152387
tr|Q1V507|Q1V507_VIBAL	-1.10183	0.0378789
tr|Q1VA78|Q1VA78_VIBAL	-0.169036	0.493985
tr|Q1VAJ1|Q1VAJ1_VIBAL	-1.10487	0.037288
tr|Q1V5L8|Q1V5L8_VIBAL	0.696798	0.109207
tr|Q1VAS9|Q1VAS9_VIBAL	-0.348964	0.289654
tr|Q1VBD5|Q1VBD5_VIBAL	-0.238353	0.404939
tr|Q1VBI3|Q1VBI3_VIBAL	-0.202025	0.449645
tr|Q1VBU7|Q1VBU7_VIBAL	-0.997285	0.0498618
tr|Q1V7U5|Q1V7U5_VIBAL	-0.0733863	0.618882
tr|Q1V854|Q1V854_VIBAL	-0.917933	0.0623167
tr|Q1VDG2|Q1VDG2_VIBAL	-0.899793	0.0659384
tr|Q1VDZ1|Q1VDZ1_VIBAL	-0.667268	0.122342
tr|Q1V428|Q1V428_VIBAL	-0.923973	0.0612795
tr|Q1V9F3|Q1V9F3_VIBAL	0.244514	0.408825
tr|Q1V9I8|Q1V9I8_VIBAL	-0.939573	0.0584655
tr|Q1VAP3|Q1VAP3_VIBAL	-0.0620858	0.634159
tr|Q1VEG2|Q1VEG2_VIBAL	0.0346368	0.689501
tr|Q1V752|Q1V752_VIBAL	-0.802205	0.0844506
tr|Q1V7G6|Q1V7G6_VIBAL	0.0682918	0.645254
tr|Q1V7J3|Q1V7J3_VIBAL	-1.03178	0.0451307
tr|Q1VCV5|Q1VCV5_VIBAL	-0.758901	0.0943124
tr|Q1V3B5|Q1V3B5_VIBAL	-1.37649	0.0182572
tr|Q1VDN1|Q1VDN1_VIBAL	-0.352467	0.286801
tr|Q1V3Y9|Q1V3Y9_VIBAL	-0.60299	0.145275
tr|Q1VF41|Q1VF41_VIBAL	-0.904793	0.0653092
tr|Q1V555|Q1V555_VIBAL	0.209783	0.452251
tr|Q1VAB3|Q1VAB3_VIBAL	-0.346417	0.291265
tr|Q1VB34|Q1VB34_VIBAL	1.41899	0.0136238
tr|Q1VBB1|Q1VBB1_VIBAL	-0.719633	0.106482
tr|Q1VBJ7|Q1VBJ7_VIBAL	-0.566054	0.158857
tr|Q1V3R6|Q1V3R6_VIBAL	-0.217192	0.430083
tr|Q1VBT4|Q1VBT4_VIBAL	-0.194721	0.460085
tr|Q1V8U7|Q1V8U7_VIBAL	-1.0039	0.0485781
tr|Q1V451|Q1V451_VIBAL	-0.569814	0.157845
tr|Q1VF18|Q1VF18_VIBAL	0.501855	0.187787
tr|Q1V5C9|Q1V5C9_VIBAL	0.874054	0.0648204
tr|Q1VAL2|Q1VAL2_VIBAL	-0.933179	0.0593029
tr|Q1V745|Q1V745_VIBAL	-0.600897	0.14604
tr|Q1VC36|Q1VC36_VIBAL	-0.658592	0.125934
tr|Q1V7V2|Q1V7V2_VIBAL	-0.237281	0.406368
tr|Q1VDP1|Q1VDP1_VIBAL	0.0735063	0.638155
tr|Q1VDW6|Q1VDW6_VIBAL	-0.785023	0.088238
tr|Q1V9I6|Q1V9I6_VIBAL	-0.387315	0.25745
tr|Q1V508|Q1V508_VIBAL	-1.15571	0.0330542
tr|Q1VFI7|Q1VFI7_VIBAL	-1.21768	0.0272306
tr|Q1VA63|Q1VA63_VIBAL	-0.468662	0.204837
tr|Q1V5K4|Q1V5K4_VIBAL	-0.950071	0.0568629
tr|Q1V608|Q1V608_VIBAL	-0.291107	0.346053
tr|Q1VE79|Q1VE79_VIBAL	-0.672139	0.120612
tr|Q1V7T0|Q1V7T0_VIBAL	-0.784294	0.0882891
tr|Q1V8A4|Q1V8A4_VIBAL	-0.559845	0.161471
tr|Q1V4G8|Q1V4G8_VIBAL	0.808812	0.0778193
tr|Q1VEV6|Q1VEV6_VIBAL	-1.0771	0.0405484
tr|Q1VFE5|Q1VFE5_VIBAL	-0.237026	0.406814
tr|Q1VFJ1|Q1VFJ1_VIBAL	-0.20314	0.447957
tr|Q1VAB2|Q1VAB2_VIBAL	-0.796369	0.0849692
tr|Q1V691|Q1V691_VIBAL	0.341654	0.303116
tr|Q1VBR8|Q1VBR8_VIBAL	-0.993939	0.0503677
tr|Q1V7R2|Q1V7R2_VIBAL	-0.841782	0.0753156
tr|Q1V7U1|Q1V7U1_VIBAL	-0.290597	0.346465
tr|Q1V3R5|Q1V3R5_VIBAL	-0.608526	0.143061
tr|Q1VE96|Q1VE96_VIBAL	-0.169353	0.493747
tr|Q1V4A1|Q1V4A1_VIBAL	0.0853807	0.623579
tr|Q1V922|Q1V922_VIBAL	-0.0626299	0.633279
tr|Q1V9A5|Q1V9A5_VIBAL	-1.45664	0.0148523
tr|Q1VEZ7|Q1VEZ7_VIBAL	-1.80344	0.00697131
tr|Q1VA37|Q1VA37_VIBAL	-0.699997	0.111702
tr|Q1VA39|Q1VA39_VIBAL	-0.238862	0.404374
tr|Q1VA84|Q1VA84_VIBAL	-1.07499	0.0407311
tr|Q1VAG3|Q1VAG3_VIBAL	-0.861671	0.0719065
tr|Q1V5W1|Q1V5W1_VIBAL	-0.716044	0.107439
tr|Q1VC35|Q1VC35_VIBAL	-0.339167	0.298232
tr|Q1VDR3|Q1VDR3_VIBAL	-1.16459	0.0321063
tr|Q1V9H6|Q1V9H6_VIBAL	-0.259183	0.380536
tr|Q1V9T0|Q1V9T0_VIBAL	0.219882	0.438351
tr|Q1V4U1|Q1V4U1_VIBAL	-0.39652	0.250465
tr|Q1VF89|Q1VF89_VIBAL	-0.735771	0.101845
tr|Q1VFI5|Q1VFI5_VIBAL	-1.48855	0.0136068
tr|Q1VAX3|Q1VAX3_VIBAL	-0.962351	0.0552306
tr|Q1V5W2|Q1V5W2_VIBAL	-1.12343	0.0358767
tr|Q1VB61|Q1VB61_VIBAL	-0.603864	0.144944
tr|Q1V6K5|Q1V6K5_VIBAL	-1.04097	0.0434431
tr|Q1VDL5|Q1VDL5_VIBAL	-0.885233	0.0678342
tr|Q1V434|Q1V434_VIBAL	-0.706159	0.109488
tr|Q1VEK2|Q1VEK2_VIBAL	-1.11206	0.0368799
tr|Q1V464|Q1V464_VIBAL	-1.47259	0.0142784
tr|Q1V4P0|Q1V4P0_VIBAL	-0.627911	0.13671
tr|Q1V9U7|Q1V9U7_VIBAL	-0.683407	0.116718
tr|Q1V528|Q1V528_VIBAL	-0.466462	0.206121
tr|Q1VGD3|Q1VGD3_VIBAL	-1.26615	0.024204
tr|Q1V679|Q1V679_VIBAL	-0.412282	0.240701
tr|Q1VB57|Q1VB57_VIBAL	-1.12257	0.0359065
tr|Q1VEL3|Q1VEL3_VIBAL	-0.0482479	0.651715
tr|Q1V7Z8|Q1V7Z8_VIBAL	0.411229	0.24579
tr|Q1V805|Q1V805_VIBAL	-0.881877	0.0681743
tr|Q1VBC9|Q1VBC9_VIBAL	0.723028	0.102189
tr|Q1V8D1|Q1V8D1_VIBAL	0.0784147	0.631928
tr|Q1V959|Q1V959_VIBAL	-0.340622	0.296986
tr|Q1V4Q1|Q1V4Q1_VIBAL	-0.337922	0.299095
tr|Q1VA45|Q1VA45_VIBAL	-0.621128	0.138755
tr|Q1VFI8|Q1VFI8_VIBAL	-1.05255	0.0422147
tr|Q1V5E7|Q1V5E7_VIBAL	-1.22118	0.0271073
tr|Q1V5M3|Q1V5M3_VIBAL	-1.27126	0.023779
tr|Q1VB63|Q1VB63_VIBAL	-0.733749	0.102295
tr|Q1V6Q3|Q1V6Q3_VIBAL	0.119199	0.573658
tr|Q1V739|Q1V739_VIBAL	-0.523698	0.175588
tr|Q1VCS8|Q1VCS8_VIBAL	0.82185	0.0754857
tr|Q1VC39|Q1VC39_VIBAL	0.0680939	0.64542
tr|Q1V3G6|Q1V3G6_VIBAL	-0.363528	0.276791
tr|Q1VD56|Q1VD56_VIBAL	-0.916776	0.0629628
tr|Q1V3K4|Q1V3K4_VIBAL	-0.363325	0.277012
tr|Q1VDB5|Q1VDB5_VIBAL	-0.535687	0.171107
tr|Q1V3V8|Q1V3V8_VIBAL	-0.110446	0.568489
tr|Q1V8T4|Q1V8T4_VIBAL	-0.152477	0.515124
tr|Q1VEB3|Q1VEB3_VIBAL	-0.574016	0.156434
tr|Q1VEV3|Q1VEV3_VIBAL	-1.14266	0.0337428
tr|Q1V9F4|Q1V9F4_VIBAL	-0.52312	0.175838
tr|Q1V4N2|Q1V4N2_VIBAL	-0.141311	0.528774
tr|Q1VFZ7|Q1VFZ7_VIBAL	-0.899033	0.0660191
tr|Q1V667|Q1V667_VIBAL	0.194545	0.473063
tr|Q1V6P0|Q1V6P0_VIBAL	-0.345206	0.29223
tr|Q1V2Z7|Q1V2Z7_VIBAL	1.34532	0.0168799
tr|Q1V322|Q1V322_VIBAL	-0.103085	0.579201
tr|Q1V764|Q1V764_VIBAL	-0.958943	0.0556174
tr|Q1V3Q5|Q1V3Q5_VIBAL	0.496642	0.191341
tr|Q1V8K0|Q1V8K0_VIBAL	-0.645324	0.129535
tr|Q1VEL6|Q1VEL6_VIBAL	-0.388914	0.256714
tr|Q1VEM6|Q1VEM6_VIBAL	-0.466236	0.206168
tr|Q1V9J0|Q1V9J0_VIBAL	-0.238681	0.404578
tr|Q1V4Y9|Q1V4Y9_VIBAL	-0.831482	0.0773603
tr|Q1VFR2|Q1VFR2_VIBAL	-0.75353	0.0954772
tr|Q1VAA0|Q1VAA0_VIBAL	-0.243183	0.399205
tr|Q1VG05|Q1VG05_VIBAL	-0.566486	0.158733
tr|Q1VAW3|Q1VAW3_VIBAL	-0.944894	0.0575005
tr|Q1V605|Q1V605_VIBAL	-1.02888	0.0454155
tr|Q1V4W1|Q1V4W1_VIBAL	0.399726	0.25302
tr|Q1VDI2|Q1VDI2_VIBAL	-0.993922	0.0503677
tr|Q1VBM6|Q1VBM6_VIBAL	-0.871176	0.0704357
tr|Q1V334|Q1V334_VIBAL	-0.462692	0.208234
tr|Q1VBV4|Q1VBV4_VIBAL	0.157296	0.524289
tr|Q1VBY6|Q1VBY6_VIBAL	-0.797423	0.0848289
tr|Q1V372|Q1V372_VIBAL	0.784541	0.08417
tr|Q1VBS8|Q1VBS8_VIBAL	-0.64013	0.131333
tr|Q1V7F0|Q1V7F0_VIBAL	-0.654794	0.127129
tr|Q1V3K1|Q1V3K1_VIBAL	-0.597093	0.147681
tr|Q1V897|Q1V897_VIBAL	-0.50293	0.185713
tr|Q1V8A2|Q1V8A2_VIBAL	-0.800928	0.0845781
tr|Q1V8R9|Q1V8R9_VIBAL	-0.552021	0.164387
tr|Q1VF38|Q1VF38_VIBAL	-0.51036	0.182325
tr|Q1V4W4|Q1V4W4_VIBAL	-0.412565	0.240527
tr|Q1V5M6|Q1V5M6_VIBAL	-0.483313	0.19631
tr|Q1V6F9|Q1V6F9_VIBAL	0.284703	0.361552
tr|Q1V6K3|Q1V6K3_VIBAL	0.311795	0.333186
tr|Q1V2X8|Q1V2X8_VIBAL	-0.645028	0.129662
tr|Q1VBU0|Q1VBU0_VIBAL	-0.185921	0.471498
tr|Q1V351|Q1V351_VIBAL	0.435107	0.228251
tr|Q1V443|Q1V443_VIBAL	-0.598291	0.147078
tr|Q1VD22|Q1VD22_VIBAL	-0.271475	0.365866
tr|Q1VDB0|Q1VDB0_VIBAL	-1.1552	0.0331222
tr|Q1V8M1|Q1V8M1_VIBAL	-1.09277	0.0390988
tr|Q1VAQ8|Q1VAQ8_VIBAL	-0.119732	0.555936
tr|Q1V8T6|Q1V8T6_VIBAL	-0.473185	0.202687
tr|Q1V9B8|Q1V9B8_VIBAL	-0.444551	0.218533
tr|Q1V4W8|Q1V4W8_VIBAL	0.380485	0.268336
tr|Q1VFA7|Q1VFA7_VIBAL	-1.11029	0.0369564
tr|Q1VG84|Q1VG84_VIBAL	-0.931966	0.0596769
tr|Q1VG94|Q1VG94_VIBAL	-0.259228	0.380536
tr|Q1V5V8|Q1V5V8_VIBAL	-0.416889	0.238181
tr|Q1VBV3|Q1VBV3_VIBAL	-0.626898	0.136854
tr|Q1V754|Q1V754_VIBAL	-0.353053	0.286338
tr|Q1VCH3|Q1VCH3_VIBAL	-1.47744	0.0139214
tr|Q1V7I6|Q1V7I6_VIBAL	-1.68784	0.0088204
tr|Q1V8C4|Q1V8C4_VIBAL	0.0906492	0.615549
tr|Q1V449|Q1V449_VIBAL	-1.58814	0.0110521
tr|Q1V8Z4|Q1V8Z4_VIBAL	-0.0463031	0.654589
tr|Q1V5F7|Q1V5F7_VIBAL	-0.236129	0.408191
tr|Q1V5J8|Q1V5J8_VIBAL	-0.558986	0.161777
tr|Q1VGE6|Q1VGE6_VIBAL	1.74192	0.00658023
tr|Q1VB21|Q1VB21_VIBAL	-1.14699	0.0335813
tr|Q1V6B2|Q1V6B2_VIBAL	0.604917	0.14247
tr|Q1VBN6|Q1VBN6_VIBAL	-0.871477	0.0704102
tr|Q1VBU4|Q1VBU4_VIBAL	-0.97352	0.0538533
tr|Q1V756|Q1V756_VIBAL	1.23542	0.022848
tr|Q1VC26|Q1VC26_VIBAL	-1.30908	0.0221084
tr|Q1V364|Q1V364_VIBAL	0.210959	0.450563
tr|Q1V367|Q1V367_VIBAL	-1.24513	0.025543
tr|Q1V7D7|Q1V7D7_VIBAL	-0.243813	0.398963
tr|Q1V7M0|Q1V7M0_VIBAL	-0.285785	0.35084
tr|Q1V3K6|Q1V3K6_VIBAL	-0.393826	0.252999
tr|Q1VDA0|Q1VDA0_VIBAL	-0.598114	0.14718
tr|Q1V3V9|Q1V3V9_VIBAL	-1.31903	0.0215005
tr|Q1VA46|Q1VA46_VIBAL	-0.349411	0.289271
tr|Q1VEM9|Q1VEM9_VIBAL	-0.468628	0.204837
tr|Q1VF02|Q1VF02_VIBAL	-1.09367	0.0390733
tr|Q1V4V9|Q1V4V9_VIBAL	-0.866049	0.0711243
tr|Q1VF95|Q1VF95_VIBAL	-0.429457	0.229165
tr|Q1VA60|Q1VA60_VIBAL	-1.07132	0.0409989
tr|Q1VAJ7|Q1VAJ7_VIBAL	-1.88282	0.00634644
tr|Q1VG67|Q1VG67_VIBAL	-0.330306	0.305934
tr|Q1VAY7|Q1VAY7_VIBAL	-0.0910911	0.596319
tr|Q1V624|Q1V624_VIBAL	-0.595141	0.148438
tr|Q1V3P5|Q1V3P5_VIBAL	-1.33594	0.0207056
tr|Q1VBM0|Q1VBM0_VIBAL	-0.23302	0.41095
tr|Q1VBR4|Q1VBR4_VIBAL	-0.617635	0.139889
tr|Q1V6W3|Q1V6W3_VIBAL	-0.300959	0.335082
tr|Q1V7A3|Q1V7A3_VIBAL	-0.759487	0.0942274
tr|Q1V7J8|Q1V7J8_VIBAL	-0.693144	0.114053
tr|Q1V3D8|Q1V3D8_VIBAL	-0.889976	0.0673369
tr|Q1V7T2|Q1V7T2_VIBAL	-0.786318	0.08783
tr|Q1VAD4|Q1VAD4_VIBAL	-0.237303	0.406363
tr|Q1V801|Q1V801_VIBAL	0.0774478	0.63316
tr|Q1VDB1|Q1VDB1_VIBAL	-0.83075	0.077492
tr|Q1V8A7|Q1V8A7_VIBAL	0.0975759	0.605479
tr|Q1VDL0|Q1VDL0_VIBAL	-0.787675	0.0874431
tr|Q1V427|Q1V427_VIBAL	-0.547563	0.166257
tr|Q1V8Y3|Q1V8Y3_VIBAL	-0.139563	0.531192
tr|Q1V903|Q1V903_VIBAL	-0.682876	0.116893
tr|Q1V908|Q1V908_VIBAL	-0.593774	0.149067
tr|Q1VEV9|Q1VEV9_VIBAL	-0.881801	0.068187
tr|Q1V526|Q1V526_VIBAL	-0.0932591	0.593501
tr|Q1VAA9|Q1VAA9_VIBAL	-1.12568	0.0355749
tr|Q1V5N6|Q1V5N6_VIBAL	-0.926461	0.0609904
tr|Q1V5Q8|Q1V5Q8_VIBAL	-0.841076	0.0754049
tr|Q1V5X7|Q1V5X7_VIBAL	-1.14538	0.0336153
tr|Q1V6P7|Q1V6P7_VIBAL	-0.666496	0.122491
tr|Q1VBJ8|Q1VBJ8_VIBAL	-0.112934	0.565029
tr|Q1V337|Q1V337_VIBAL	-0.434237	0.224944
tr|Q1V3X9|Q1V3X9_VIBAL	-1.30081	0.0226227
tr|Q1V5H9|Q1V5H9_VIBAL	-0.393572	0.253109
tr|Q1VD62|Q1VD62_VIBAL	0.0743815	0.63705
tr|Q1VDD2|Q1VDD2_VIBAL	-0.522228	0.176642
tr|Q1V3Q2|Q1V3Q2_VIBAL	-0.990292	0.050831
tr|Q1V8E0|Q1V8E0_VIBAL	-0.509603	0.182738
tr|Q1VDL8|Q1VDL8_VIBAL	-0.319564	0.316922
tr|Q1VE93|Q1VE93_VIBAL	-0.817669	0.0805143
tr|Q1VEE8|Q1VEE8_VIBAL	-1.32597	0.021322
tr|Q1VEV8|Q1VEV8_VIBAL	-1.76248	0.00746015
tr|Q1V9B0|Q1V9B0_VIBAL	-0.877202	0.0688374
tr|Q1V9L3|Q1V9L3_VIBAL	-0.204418	0.44664
tr|Q1VFL6|Q1VFL6_VIBAL	0.960433	0.050542
tr|Q1V5E8|Q1V5E8_VIBAL	-0.600214	0.146368
tr|Q1VFZ5|Q1VFZ5_VIBAL	-0.648223	0.128765
tr|Q1V7L9|Q1V7L9_VIBAL	-0.342812	0.294563
tr|Q1V4R3|Q1V4R3_VIBAL	-0.0346021	0.668999
tr|Q1VET7|Q1VET7_VIBAL	-0.853877	0.0727991
tr|Q1V768|Q1V768_VIBAL	-0.370704	0.271167
tr|Q1VCP9|Q1VCP9_VIBAL	-0.140332	0.530193
tr|Q1VC80|Q1VC80_VIBAL	0.449585	0.219583
tr|Q1V3I7|Q1V3I7_VIBAL	-0.890094	0.0673369
tr|Q1V826|Q1V826_VIBAL	-1.05486	0.0419596
tr|Q1V847|Q1V847_VIBAL	-0.737159	0.101237
tr|Q1V3K2|Q1V3K2_VIBAL	0.164318	0.514516
tr|Q1VE29|Q1VE29_VIBAL	-0.342525	0.29498
tr|Q1V8F1|Q1V8F1_VIBAL	-1.5674	0.0115452
tr|Q1V3X2|Q1V3X2_VIBAL	-1.25543	0.0249394
tr|Q1VEI9|Q1VEI9_VIBAL	2.77723	0.00171307
tr|Q1V8Z5|Q1V8Z5_VIBAL	0.573093	0.155685
tr|Q1VF56|Q1VF56_VIBAL	-1.05311	0.0421296
tr|Q1V506|Q1V506_VIBAL	-0.820973	0.0800765
tr|Q1VFR1|Q1VFR1_VIBAL	-0.78772	0.0874049
tr|Q1VAA4|Q1VAA4_VIBAL	-1.13151	0.034831
tr|Q1V5I7|Q1V5I7_VIBAL	-0.465837	0.206317
tr|Q1VAJ4|Q1VAJ4_VIBAL	-0.540228	0.169526
tr|Q1V5N0|Q1V5N0_VIBAL	0.715454	0.104009
tr|Q1VAN9|Q1VAN9_VIBAL	0.0831763	0.626389
tr|Q1VAW2|Q1VAW2_VIBAL	-1.21209	0.0274942
tr|Q1VGD5|Q1VGD5_VIBAL	-1.6735	0.00910096
tr|Q1VGD8|Q1VGD8_VIBAL	-0.3586	0.280978
tr|Q1V661|Q1V661_VIBAL	-1.10858	0.0370414
tr|Q1V6I1|Q1V6I1_VIBAL	-0.594256	0.148905
tr|Q1VG98|Q1VG98_VIBAL	-1.25034	0.025373
tr|Q1V312|Q1V312_VIBAL	0.0101928	0.71926
tr|Q1VC25|Q1VC25_VIBAL	-0.360809	0.279141
tr|Q1V7H5|Q1V7H5_VIBAL	-1.01529	0.0470861
tr|Q1V7I5|Q1V7I5_VIBAL	-0.511011	0.181972
tr|Q1VEF4|Q1VEF4_VIBAL	-0.190551	0.464714
tr|Q1V3U4|Q1V3U4_VIBAL	-0.42468	0.232476
tr|Q1VDU0|Q1VDU0_VIBAL	-0.705548	0.109535
tr|Q1V3Z5|Q1V3Z5_VIBAL	0.0791217	0.631069
tr|Q1VE16|Q1VE16_VIBAL	-0.309094	0.326899
tr|Q1V4Q6|Q1V4Q6_VIBAL	0.109867	0.587086
tr|Q1V9V8|Q1V9V8_VIBAL	-1.52435	0.0125951
tr|Q1VFG1|Q1VFG1_VIBAL	-0.858723	0.0722338
tr|Q1V539|Q1V539_VIBAL	-0.674967	0.119732
tr|Q1V5R8|Q1V5R8_VIBAL	-0.220482	0.425751
tr|Q1VB38|Q1VB38_VIBAL	-0.832918	0.0771435
tr|Q1VBB3|Q1VBB3_VIBAL	-0.680833	0.117382
tr|Q1V2Z5|Q1V2Z5_VIBAL	0.460422	0.212727
tr|Q1V6U1|Q1V6U1_VIBAL	-0.560559	0.161186
tr|Q1V477|Q1V477_VIBAL	-0.899235	0.0659809
tr|Q1V7M3|Q1V7M3_VIBAL	-0.302719	0.333411
tr|Q1V593|Q1V593_VIBAL	0.390376	0.260816
tr|Q1VE65|Q1VE65_VIBAL	-1.38702	0.0177258
tr|Q1V3W6|Q1V3W6_VIBAL	-0.689255	0.115056
tr|Q1V3N0|Q1V3N0_VIBAL	-1.58489	0.0111456
tr|Q1V6S4|Q1V6S4_VIBAL	-0.680211	0.117552
tr|Q1V8U2|Q1V8U2_VIBAL	0.054942	0.663515
tr|Q1VEH7|Q1VEH7_VIBAL	-1.28713	0.0231371
tr|Q1V8Y8|Q1V8Y8_VIBAL	-0.645216	0.129607
tr|Q1V941|Q1V941_VIBAL	-0.8819	0.0681743
tr|Q1V9I5|Q1V9I5_VIBAL	0.796695	0.0807609
tr|Q1V4Y4|Q1V4Y4_VIBAL	-0.408412	0.242954
tr|Q1VF80|Q1VF80_VIBAL	-0.77203	0.0913326
tr|Q1VFN4|Q1VFN4_VIBAL	-0.37359	0.269046
tr|Q1VFQ2|Q1VFQ2_VIBAL	-0.334583	0.302125
tr|Q1V5U9|Q1V5U9_VIBAL	-0.326578	0.309751
tr|Q1V6J6|Q1V6J6_VIBAL	-0.481451	0.197603
tr|Q1V6T3|Q1V6T3_VIBAL	-0.400637	0.2476
tr|Q1V9B9|Q1V9B9_VIBAL	-0.573459	0.156812
tr|Q1VC00|Q1VC00_VIBAL	-0.450712	0.215528
tr|Q1VC17|Q1VC17_VIBAL	-1.52755	0.0124846
tr|Q1VEL7|Q1VEL7_VIBAL	-1.00641	0.0483443
tr|Q1V7L2|Q1V7L2_VIBAL	-0.271759	0.365615
tr|Q1V790|Q1V790_VIBAL	-1.00641	0.0483443
tr|Q1V368|Q1V368_VIBAL	-0.391246	0.254844
tr|Q1VDS9|Q1VDS9_VIBAL	-1.07366	0.0408629
tr|Q1V599|Q1V599_VIBAL	-1.16923	0.031847
tr|Q1VCX5|Q1VCX5_VIBAL	-1.52477	0.0125951
tr|Q1VBD8|Q1VBD8_VIBAL	-1.49372	0.013526
tr|Q1V842|Q1V842_VIBAL	-0.699504	0.111834
tr|Q1V7K0|Q1V7K0_VIBAL	0.0990525	0.602874
tr|Q1V3T2|Q1V3T2_VIBAL	-0.496726	0.189509
tr|Q1V402|Q1V402_VIBAL	-0.585639	0.152026
tr|Q1V8W2|Q1V8W2_VIBAL	-0.909997	0.0644888
tr|Q1VEB5|Q1VEB5_VIBAL	-0.870322	0.0705335
tr|Q1VEM1|Q1VEM1_VIBAL	-0.558151	0.161917
tr|Q1VES6|Q1VES6_VIBAL	0.249815	0.403435
tr|Q1V4E4|Q1V4E4_VIBAL	-0.599373	0.146691
tr|Q1V4M5|Q1V4M5_VIBAL	-0.663812	0.123396
tr|Q1VEX2|Q1VEX2_VIBAL	-0.737085	0.10125
tr|Q1V4X6|Q1V4X6_VIBAL	-0.550294	0.165245
tr|Q1V548|Q1V548_VIBAL	-0.746687	0.0984357
tr|Q1VA71|Q1VA71_VIBAL	-0.421151	0.235443
tr|Q1VFQ6|Q1VFQ6_VIBAL	-0.890877	0.0672476
tr|Q1VAF1|Q1VAF1_VIBAL	0.870611	0.0655048
tr|Q1VFW7|Q1VFW7_VIBAL	-0.896873	0.0662529
tr|Q1VAG9|Q1VAG9_VIBAL	-0.361249	0.278665
tr|Q1V5K7|Q1V5K7_VIBAL	0.797931	0.0806759
tr|Q1VAN5|Q1VAN5_VIBAL	-0.335797	0.30099
tr|Q1VAS3|Q1VAS3_VIBAL	-0.706847	0.109335
tr|Q1V6B7|Q1V6B7_VIBAL	0.236602	0.418797
tr|Q1V2X7|Q1V2X7_VIBAL	-1.46836	0.0143337
tr|Q1VBG7|Q1VBG7_VIBAL	-0.630542	0.134691
tr|Q1V6T4|Q1V6T4_VIBAL	-1.27844	0.0234219
tr|Q1V380|Q1V380_VIBAL	2.63998	0.0018916
tr|Q1V435|Q1V435_VIBAL	-0.379268	0.264043
tr|Q1V4T7|Q1V4T7_VIBAL	-0.488576	0.193458
tr|Q1VAB6|Q1VAB6_VIBAL	0.0127762	0.71543
tr|Q1V755|Q1V755_VIBAL	-0.203488	0.447583
tr|Q1V678|Q1V678_VIBAL	-0.464973	0.207073
tr|Q1V8Z6|Q1V8Z6_VIBAL	-0.380007	0.263371
tr|Q1VG39|Q1VG39_VIBAL	-0.425684	0.231651
tr|Q1V5S9|Q1V5S9_VIBAL	-0.225081	0.420561
tr|Q1VCB1|Q1VCB1_VIBAL	-1.42642	0.0160723
tr|Q1V3D1|Q1V3D1_VIBAL	-0.933742	0.0592434
tr|Q1V5I3|Q1V5I3_VIBAL	-0.31398	0.322278
tr|Q1V316|Q1V316_VIBAL	1.31503	0.0182572
tr|Q1V7M4|Q1V7M4_VIBAL	0.213445	0.44726
tr|Q1V4X5|Q1V4X5_VIBAL	-0.825532	0.0794219
tr|Q1V5P9|Q1V5P9_VIBAL	-0.710444	0.108765
tr|Q1V781|Q1V781_VIBAL	-0.489249	0.193348
tr|Q1V436|Q1V436_VIBAL	-1.14955	0.033407
tr|Q1VB35|Q1VB35_VIBAL	-0.335274	0.301441
tr|Q1VD89|Q1VD89_VIBAL	-1.05662	0.0418278
tr|Q1V3S6|Q1V3S6_VIBAL	-1.73875	0.00792349
tr|Q1V3Y3|Q1V3Y3_VIBAL	-1.20892	0.0277747
tr|Q1VAX0|Q1VAX0_VIBAL	-0.39804	0.249199
tr|Q1V7I1|Q1V7I1_VIBAL	-0.373132	0.269394
tr|Q1V5C7|Q1V5C7_VIBAL	-0.568885	0.158062
DECOY1_tr|Q1V4L4|Q1V4L4_VIBAL	0.51241	0.182321
tr|Q1VET3|Q1VET3_VIBAL	-1.40809	0.0168587
tr|Q1V4P8|Q1V4P8_VIBAL	-0.980878	0.0524931
tr|Q1V4T3|Q1V4T3_VIBAL	-0.775359	0.0906823
tr|Q1VF76|Q1VF76_VIBAL	-0.98152	0.0524123
tr|Q1V5F3|Q1V5F3_VIBAL	-0.137932	0.533148
tr|Q1VAU4|Q1VAU4_VIBAL	0.094111	0.610546
tr|Q1VAV9|Q1VAV9_VIBAL	-1.17145	0.0317067
tr|Q1VGB1|Q1VGB1_VIBAL	-0.630809	0.134627
tr|Q1V6E4|Q1V6E4_VIBAL	-1.12097	0.0361615
tr|Q1VBB6|Q1VBB6_VIBAL	-1.04171	0.0433666
tr|Q1VBM1|Q1VBM1_VIBAL	-1.62396	0.00992136
tr|Q1V328|Q1V328_VIBAL	-0.226748	0.418083
tr|Q1V6M7|Q1V6M7_VIBAL	-0.594164	0.148905
tr|Q1V723|Q1V723_VIBAL	-0.89214	0.0669586
tr|Q1V898|Q1V898_VIBAL	-0.33945	0.298125
tr|Q1V8W0|Q1V8W0_VIBAL	-1.2018	0.0286036
tr|Q1V911|Q1V911_VIBAL	-0.107238	0.573186
tr|Q1VC23|Q1VC23_VIBAL	-0.946207	0.057339
tr|Q1V326|Q1V326_VIBAL	-1.26542	0.0244251
tr|Q1VD59|Q1VD59_VIBAL	0.557001	0.16173
tr|Q1VG11|Q1VG11_VIBAL	-0.409472	0.242508
tr|Q1V9L9|Q1V9L9_VIBAL	1.01822	0.0423294
tr|Q1VCV2|Q1VCV2_VIBAL	-0.486063	0.19495
tr|Q1V8F9|Q1V8F9_VIBAL	-1.26741	0.02417
tr|Q1V7K1|Q1V7K1_VIBAL	-0.709421	0.108948
tr|Q1V6N5|Q1V6N5_VIBAL	-1.02692	0.0456111
tr|Q1V9F8|Q1V9F8_VIBAL	-0.575269	0.155762
tr|Q1V4F6|Q1V4F6_VIBAL	-0.799654	0.0846971
tr|Q1VF69|Q1VF69_VIBAL	-0.384467	0.259481
tr|Q1VB43|Q1VB43_VIBAL	-0.845466	0.0738916
DECOY1_tr|Q1VBT4|Q1VBT4_VIBAL	-0.306691	0.329981
tr|Q1VDG5|Q1VDG5_VIBAL	-0.720232	0.10638
tr|Q1V8I8|Q1V8I8_VIBAL	-0.146813	0.522478
tr|Q1V3X1|Q1V3X1_VIBAL	-0.361262	0.278623
tr|Q1V401|Q1V401_VIBAL	-0.272149	0.36522
tr|Q1VFA3|Q1VFA3_VIBAL	-0.533993	0.17163
tr|Q1VFE0|Q1VFE0_VIBAL	-0.95392	0.0564251
tr|Q1VAM8|Q1VAM8_VIBAL	-1.25671	0.0248544
tr|Q1V5V7|Q1V5V7_VIBAL	-0.633301	0.133581
tr|Q1VB31|Q1VB31_VIBAL	-1.18488	0.0305165
tr|Q1V6G8|Q1V6G8_VIBAL	-0.955191	0.056136
tr|Q1VBC4|Q1VBC4_VIBAL	-0.00235655	0.710487
tr|Q1V309|Q1V309_VIBAL	-1.33276	0.0209777
tr|Q1V2Y2|Q1V2Y2_VIBAL	-1.21583	0.0273156
tr|Q1V626|Q1V626_VIBAL	0.448916	0.219834
tr|Q1V7L5|Q1V7L5_VIBAL	-0.855899	0.0724251
tr|Q1VB42|Q1VB42_VIBAL	-1.01041	0.0474644
tr|Q1VC38|Q1VC38_VIBAL	-0.930898	0.0598172
tr|Q1V5X9|Q1V5X9_VIBAL	1.18197	0.0268268
tr|Q1VAT5|Q1VAT5_VIBAL	-0.196152	0.458584
tr|Q1VA80|Q1VA80_VIBAL	-1.35714	0.0191796
tr|Q1VDL7|Q1VDL7_VIBAL	-1.10169	0.0379256
tr|Q1V3X8|Q1V3X8_VIBAL	-0.783166	0.0884081
tr|Q1VDI8|Q1VDI8_VIBAL	-0.630669	0.134661
tr|Q1VEN2|Q1VEN2_VIBAL	-0.664645	0.123095
tr|Q1V5K9|Q1V5K9_VIBAL	0.58487	0.151005
tr|Q1VFY7|Q1VFY7_VIBAL	-0.264017	0.374729
tr|Q1VCX7|Q1VCX7_VIBAL	-0.975523	0.0536833
tr|Q1VEN3|Q1VEN3_VIBAL	-0.962156	0.0552306
tr|Q1V770|Q1V770_VIBAL	0.559629	0.160986
tr|Q1VBG1|Q1VBG1_VIBAL	-0.546458	0.166772
tr|Q1VEQ4|Q1VEQ4_VIBAL	-0.361733	0.278266
tr|Q1V3L4|Q1V3L4_VIBAL	-0.89881	0.0660234
tr|Q1V7H6|Q1V7H6_VIBAL	-0.736205	0.101811
tr|Q1VFQ7|Q1VFQ7_VIBAL	-0.541697	0.168842
tr|Q1V743|Q1V743_VIBAL	-0.841424	0.0753369
tr|Q1V6A4|Q1V6A4_VIBAL	0.598852	0.145211
tr|Q1VDU7|Q1VDU7_VIBAL	-0.869531	0.0707333
tr|Q1V3T7|Q1V3T7_VIBAL	-0.541779	0.168731
tr|Q1VC79|Q1VC79_VIBAL	-1.01607	0.0469798
tr|Q1V4A4|Q1V4A4_VIBAL	-1.57363	0.0114134
tr|Q1V963|Q1V963_VIBAL	-0.916633	0.0629628
tr|Q1V4N7|Q1V4N7_VIBAL	-0.656121	0.126482
tr|Q1V504|Q1V504_VIBAL	-0.617911	0.139728
tr|Q1VA31|Q1VA31_VIBAL	-1.70903	0.00842933
tr|Q1VAN6|Q1VAN6_VIBAL	-1.19282	0.0297216
tr|Q1V7M2|Q1V7M2_VIBAL	-1.03493	0.0445356
tr|Q1VC27|Q1VC27_VIBAL	-0.788574	0.0871116
tr|Q1V796|Q1V796_VIBAL	-1.00862	0.047949
tr|Q1VBC1|Q1VBC1_VIBAL	0.693482	0.110589
tr|Q1VD61|Q1VD61_VIBAL	0.289553	0.35682
tr|Q1VF25|Q1VF25_VIBAL	0.500289	0.188786
tr|Q1VBH3|Q1VBH3_VIBAL	-0.769198	0.092068
tr|Q1VEW1|Q1VEW1_VIBAL	-0.697902	0.112336
tr|Q1V4G7|Q1V4G7_VIBAL	0.238324	0.416094
tr|Q1VFM2|Q1VFM2_VIBAL	1.32558	0.0179766
tr|Q1V9T5|Q1V9T5_VIBAL	-0.744529	0.0990138
tr|Q1VCQ5|Q1VCQ5_VIBAL	-0.864775	0.0713454
tr|Q1V777|Q1V777_VIBAL	-1.0218	0.0461509
tr|Q1V6I4|Q1V6I4_VIBAL	-1.57078	0.0114814
tr|Q1V3W0|Q1V3W0_VIBAL	-0.135405	0.536064
tr|Q1V7Z9|Q1V7Z9_VIBAL	-0.694704	0.113313
tr|Q1VA38|Q1VA38_VIBAL	-0.519307	0.178202
tr|Q1V3J6|Q1V3J6_VIBAL	-0.995223	0.0500914
tr|Q1VGC2|Q1VGC2_VIBAL	-1.14833	0.0334623
tr|Q1VBS6|Q1VBS6_VIBAL	-0.397227	0.24987
tr|Q1VAM1|Q1VAM1_VIBAL	0.167821	0.509662
tr|Q1V8J6|Q1V8J6_VIBAL	-0.516859	0.178963
tr|Q1V5T2|Q1V5T2_VIBAL	-0.603057	0.145275
tr|Q1V615|Q1V615_VIBAL	-1.5313	0.0124208
tr|Q1V3B3|Q1V3B3_VIBAL	-0.729351	0.10386
tr|Q1V6Z0|Q1V6Z0_VIBAL	-0.661972	0.124438
tr|Q1V384|Q1V384_VIBAL	-0.594633	0.148757
tr|Q1VB79|Q1VB79_VIBAL	1.49861	0.0112774
tr|Q1V6C1|Q1V6C1_VIBAL	0.217581	0.441679
tr|Q1VCP1|Q1VCP1_VIBAL	-0.207685	0.442219
tr|Q1V8F8|Q1V8F8_VIBAL	0.931101	0.054916
DECOY1_tr|Q1V555|Q1V555_VIBAL	0.820996	0.0756302
tr|Q1VBV5|Q1VBV5_VIBAL	-0.597117	0.147647
tr|Q1V4K9|Q1V4K9_VIBAL	0.663643	0.12031
tr|Q1VAI3|Q1VAI3_VIBAL	0.917451	0.0572795
tr|Q1VAK6|Q1VAK6_VIBAL	-0.0618187	0.634601
tr|Q1V6L7|Q1V6L7_VIBAL	-1.21678	0.0272561
tr|Q1VFJ2|Q1VFJ2_VIBAL	-0.264369	0.374491
tr|Q1VEW7|Q1VEW7_VIBAL	-0.754584	0.0953454
tr|Q1V8M6|Q1V8M6_VIBAL	-0.685126	0.116442
tr|Q1V5N9|Q1V5N9_VIBAL	-0.700321	0.111639
tr|Q1V5J3|Q1V5J3_VIBAL	-0.783166	0.0884081
tr|Q1V6R6|Q1V6R6_VIBAL	-0.772532	0.0911541
tr|Q1V9B3|Q1V9B3_VIBAL	0.740953	0.096221
tr|Q1VCF3|Q1VCF3_VIBAL	-0.614959	0.14091
tr|Q1VEK4|Q1VEK4_VIBAL	-0.0265312	0.67875
tr|Q1VBU8|Q1VBU8_VIBAL	-0.806548	0.0833879
tr|Q1V646|Q1V646_VIBAL	-0.712967	0.108234
tr|Q1V9G8|Q1V9G8_VIBAL	-0.645775	0.12933
tr|Q1VF36|Q1VF36_VIBAL	0.972956	0.0491137
tr|Q1VFX7|Q1VFX7_VIBAL	-1.13106	0.034848
tr|Q1V6M4|Q1V6M4_VIBAL	-0.74378	0.0994006
tr|Q1VD67|Q1VD67_VIBAL	-0.666256	0.122546
tr|Q1V3C6|Q1V3C6_VIBAL	-0.730502	0.103558
tr|Q1V5T0|Q1V5T0_VIBAL	-0.658095	0.126096
tr|Q1V902|Q1V902_VIBAL	-0.898989	0.0660191
tr|Q1VA57|Q1VA57_VIBAL	-0.551931	0.164387
tr|Q1V3Y6|Q1V3Y6_VIBAL	-1.12192	0.0361105
tr|Q1V3S7|Q1V3S7_VIBAL	-1.16659	0.032034
tr|Q1VDL9|Q1VDL9_VIBAL	0.373053	0.275116
tr|Q1VEY6|Q1VEY6_VIBAL	-0.923954	0.0612795
tr|Q1VFH1|Q1VFH1_VIBAL	-1.37184	0.0183634
tr|Q1VDR5|Q1VDR5_VIBAL	-0.775131	0.0907673
tr|Q1V4B8|Q1V4B8_VIBAL	-0.491148	0.191898
tr|Q1VEQ6|Q1VEQ6_VIBAL	1.19038	0.0261169
tr|Q1V8Q0|Q1V8Q0_VIBAL	-0.55012	0.165301
tr|Q1V9E1|Q1V9E1_VIBAL	-0.404789	0.244897
DECOY1_tr|Q1VEN2|Q1VEN2_VIBAL	0.661667	0.121611
tr|Q1V4F2|Q1V4F2_VIBAL	-0.621926	0.138559
tr|Q1V4Y5|Q1V4Y5_VIBAL	-0.841697	0.0753199
tr|Q1V538|Q1V538_VIBAL	-0.942425	0.0581424
tr|Q1V3E7|Q1V3E7_VIBAL	-0.473708	0.202419
tr|Q1V432|Q1V432_VIBAL	1.60642	0.00849309
tr|Q1V663|Q1V663_VIBAL	-0.935209	0.0591753
tr|Q1V6I8|Q1V6I8_VIBAL	0.839474	0.0710223
tr|Q1V7B8|Q1V7B8_VIBAL	-1.14321	0.0337428
tr|Q1VBE7|Q1VBE7_VIBAL	-0.831956	0.077271
tr|Q1VA43|Q1VA43_VIBAL	-0.487239	0.1941
DECOY2_tr|Q1V6H8|Q1V6H8_VIBAL	0.875782	0.0640128
tr|Q1VBH1|Q1VBH1_VIBAL	-0.348585	0.289815
DECOY2_tr|Q1VEY3|Q1VEY3_VIBAL	0.747442	0.0937768
tr|Q1V6G4|Q1V6G4_VIBAL	0.442343	0.22326
tr|Q1V3C3|Q1V3C3_VIBAL	0.751368	0.0922125
tr|Q1V9Q7|Q1V9Q7_VIBAL	-0.347832	0.290325
tr|Q1V829|Q1V829_VIBAL	-0.611804	0.141705
tr|Q1VB44|Q1VB44_VIBAL	-0.850448	0.0731392
tr|Q1VF39|Q1VF39_VIBAL	-0.995556	0.0500191
tr|Q1VF94|Q1VF94_VIBAL	-0.588587	0.151575
DECOY2_tr|Q1VC04|Q1VC04_VIBAL	-1.43288	0.0158045
tr|Q1V3R2|Q1V3R2_VIBAL	-0.264851	0.373977
tr|Q1V3J8|Q1V3J8_VIBAL	-0.451763	0.214971
tr|Q1V6D7|Q1V6D7_VIBAL	0.736891	0.0976238
tr|Q1V8F6|Q1V8F6_VIBAL	-0.516818	0.179243
tr|Q1V8U0|Q1V8U0_VIBAL	-0.417569	0.237866
tr|Q1V4X4|Q1V4X4_VIBAL	-0.311184	0.325216
tr|Q1V393|Q1V393_VIBAL	-1.06259	0.041577
